# Supplementary material
Source: PubMed Central journal article supplement (PMC9700438)

# NEXTERA chr11.117998788\_C\_T

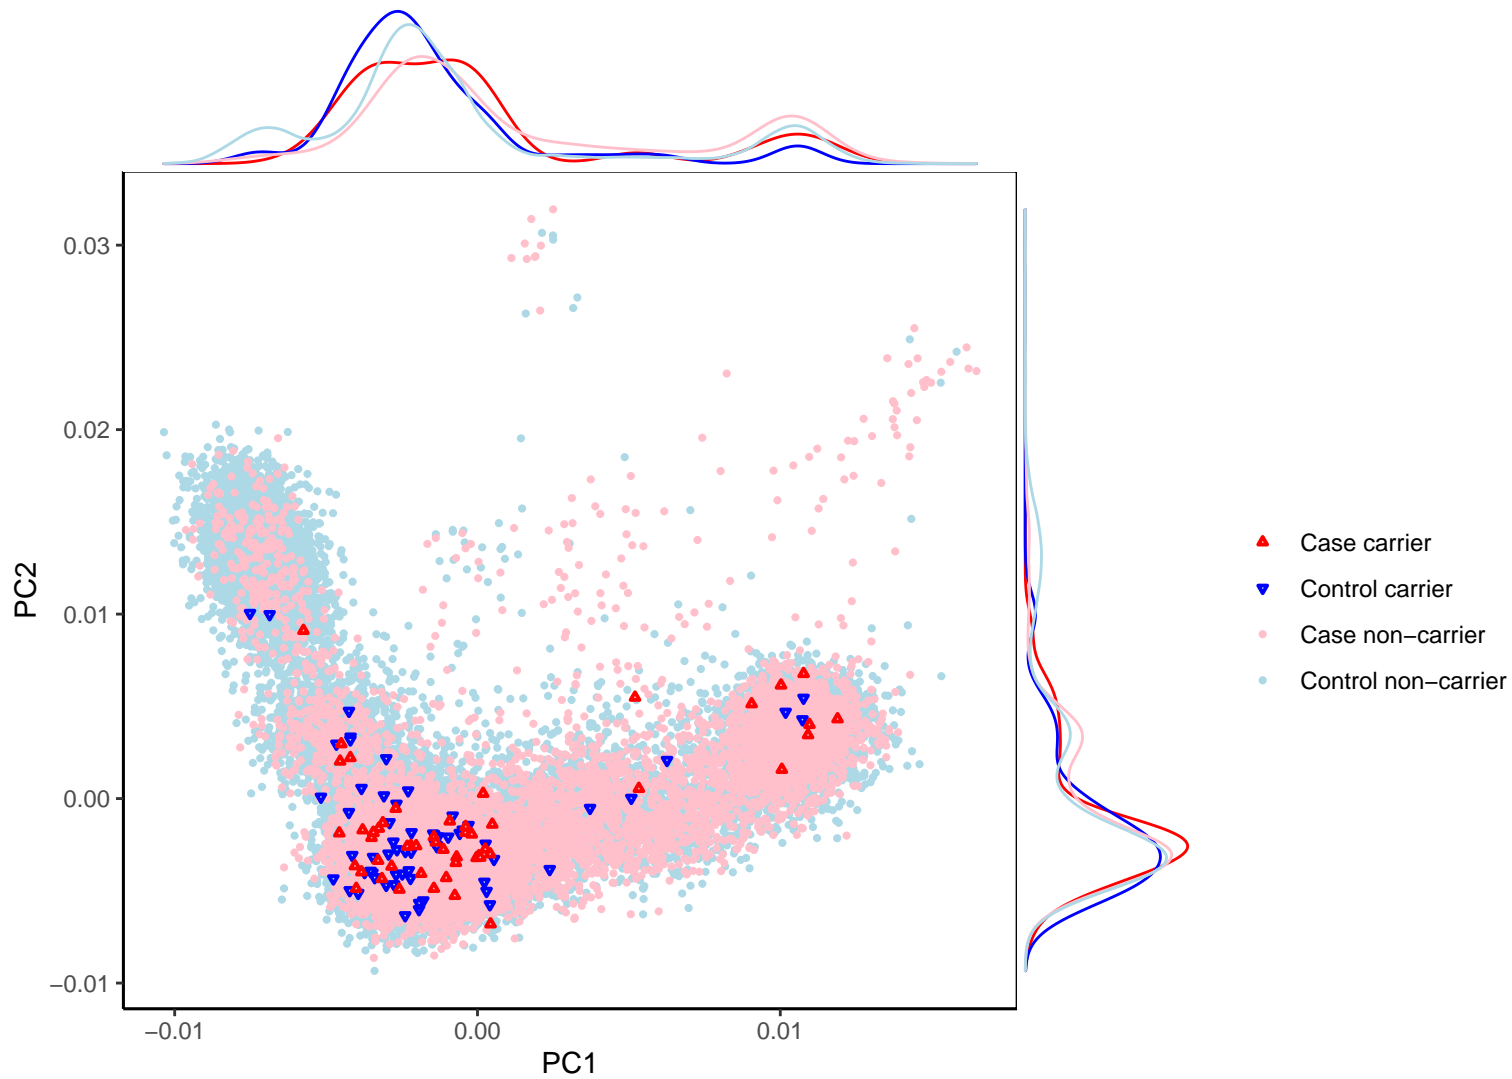

# NEXTERA chr11.65658293\_C\_T

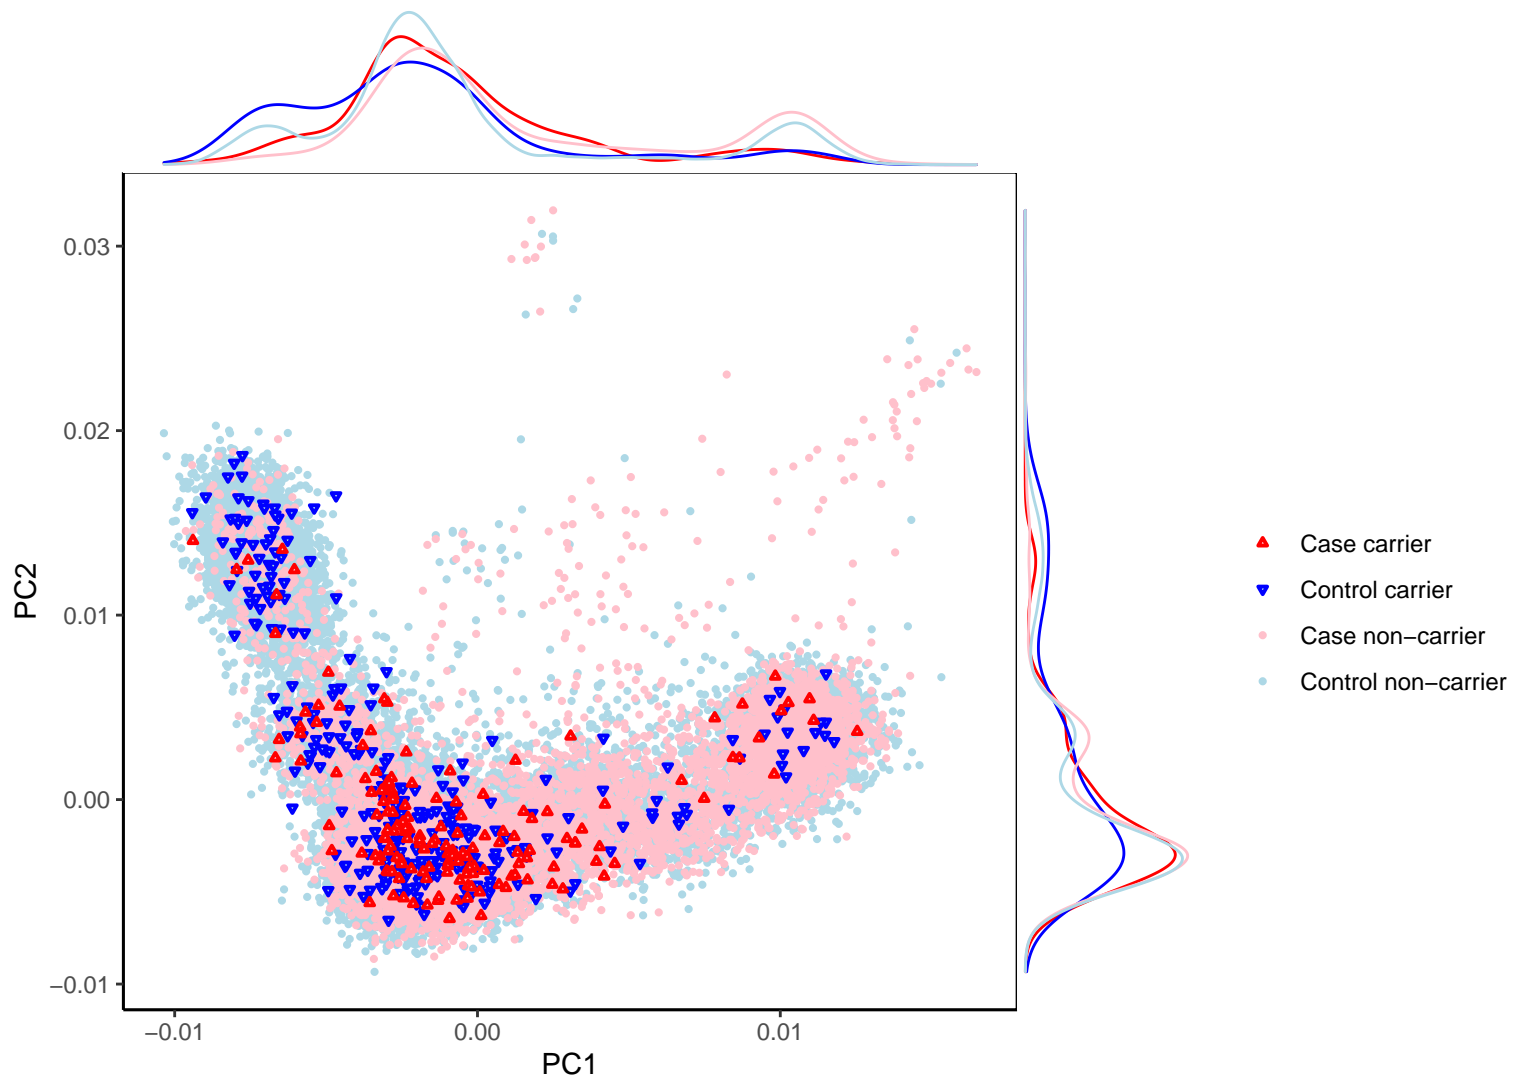

# NEXTERA chr12.40263898\_C\_G

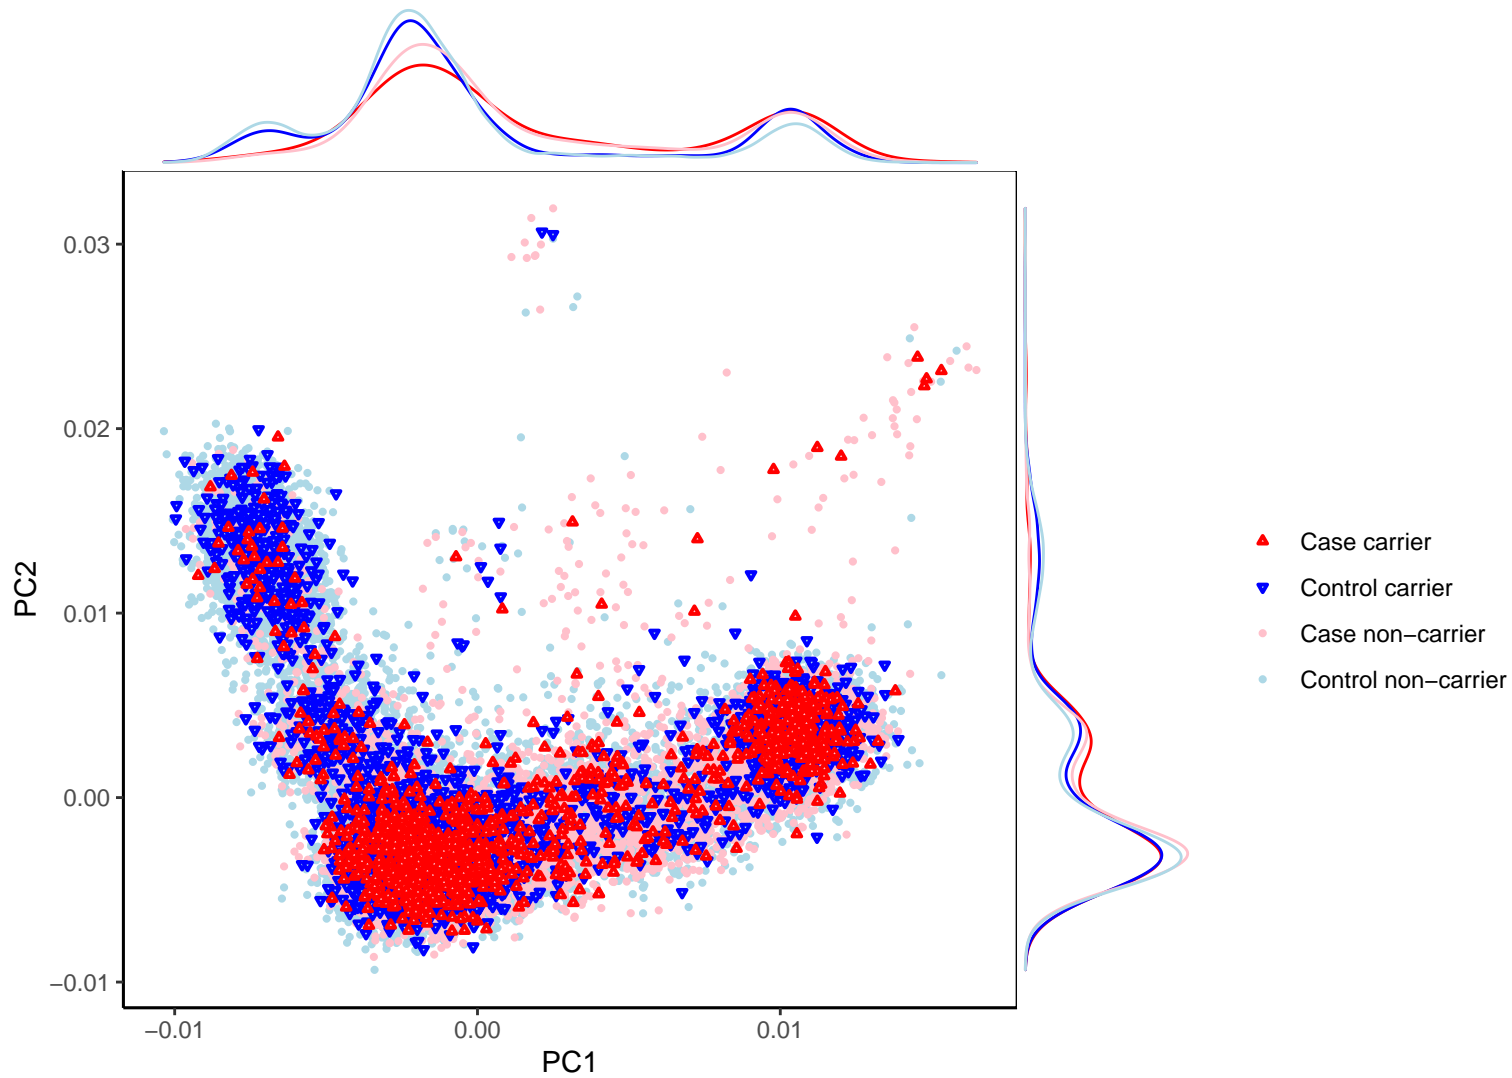

# NEXTERA chr12.40309109\_G\_A

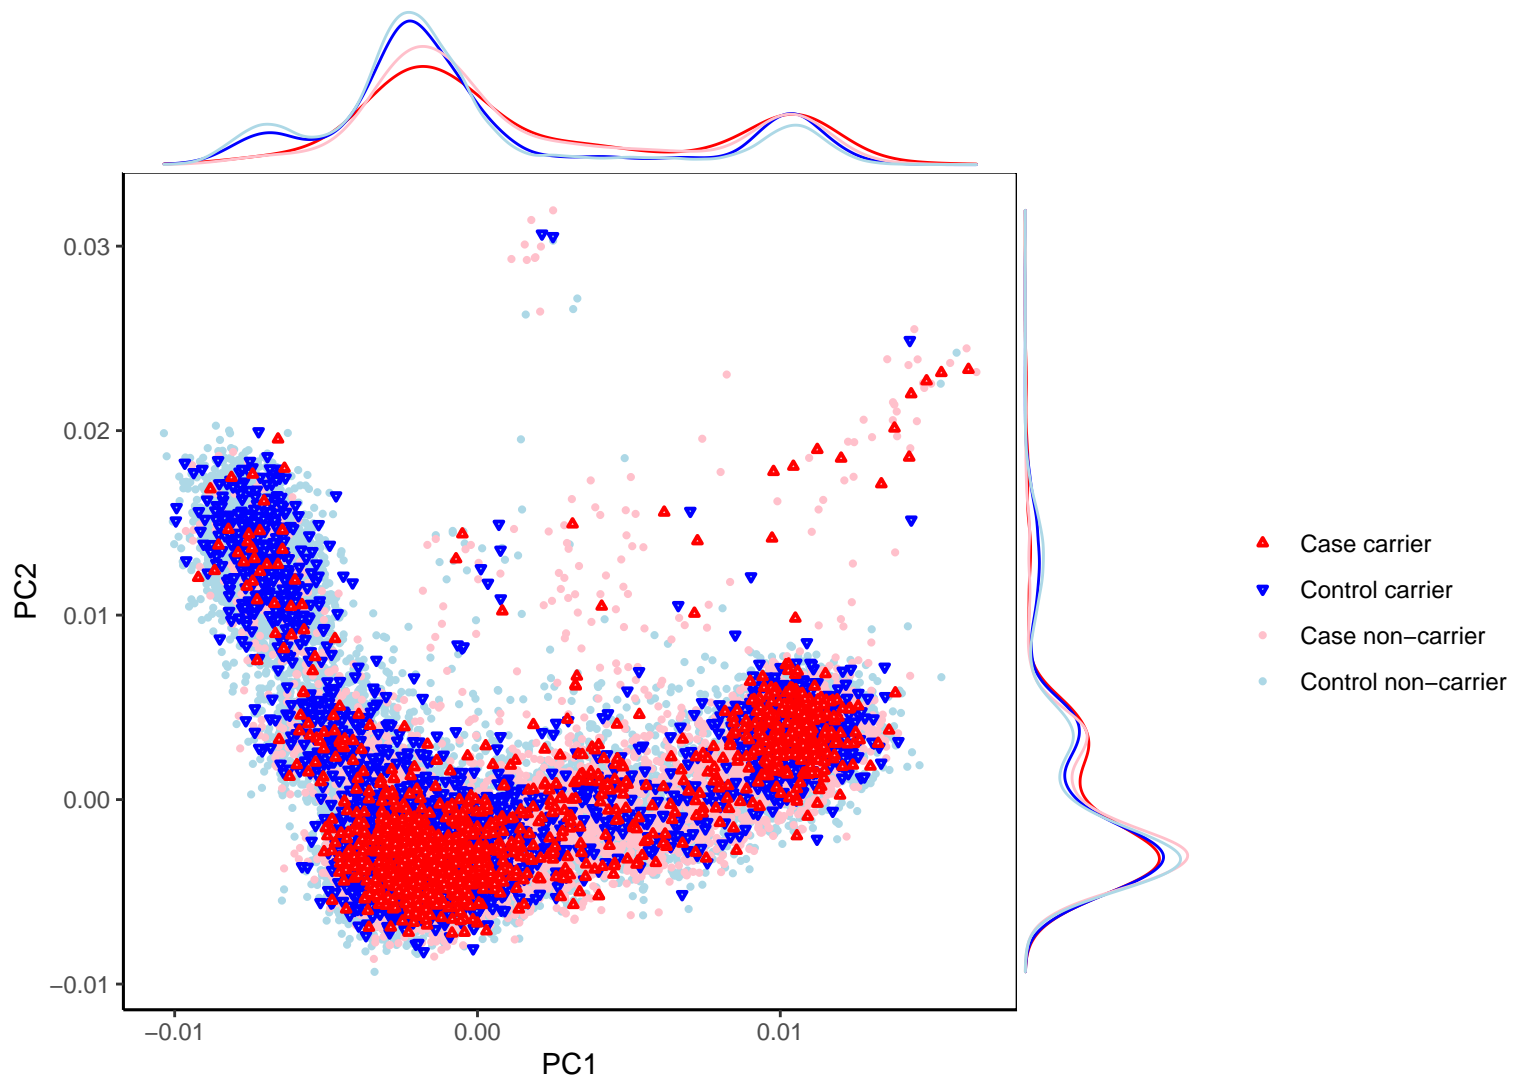



# NEXTERA chr12.40309185\_G\_A

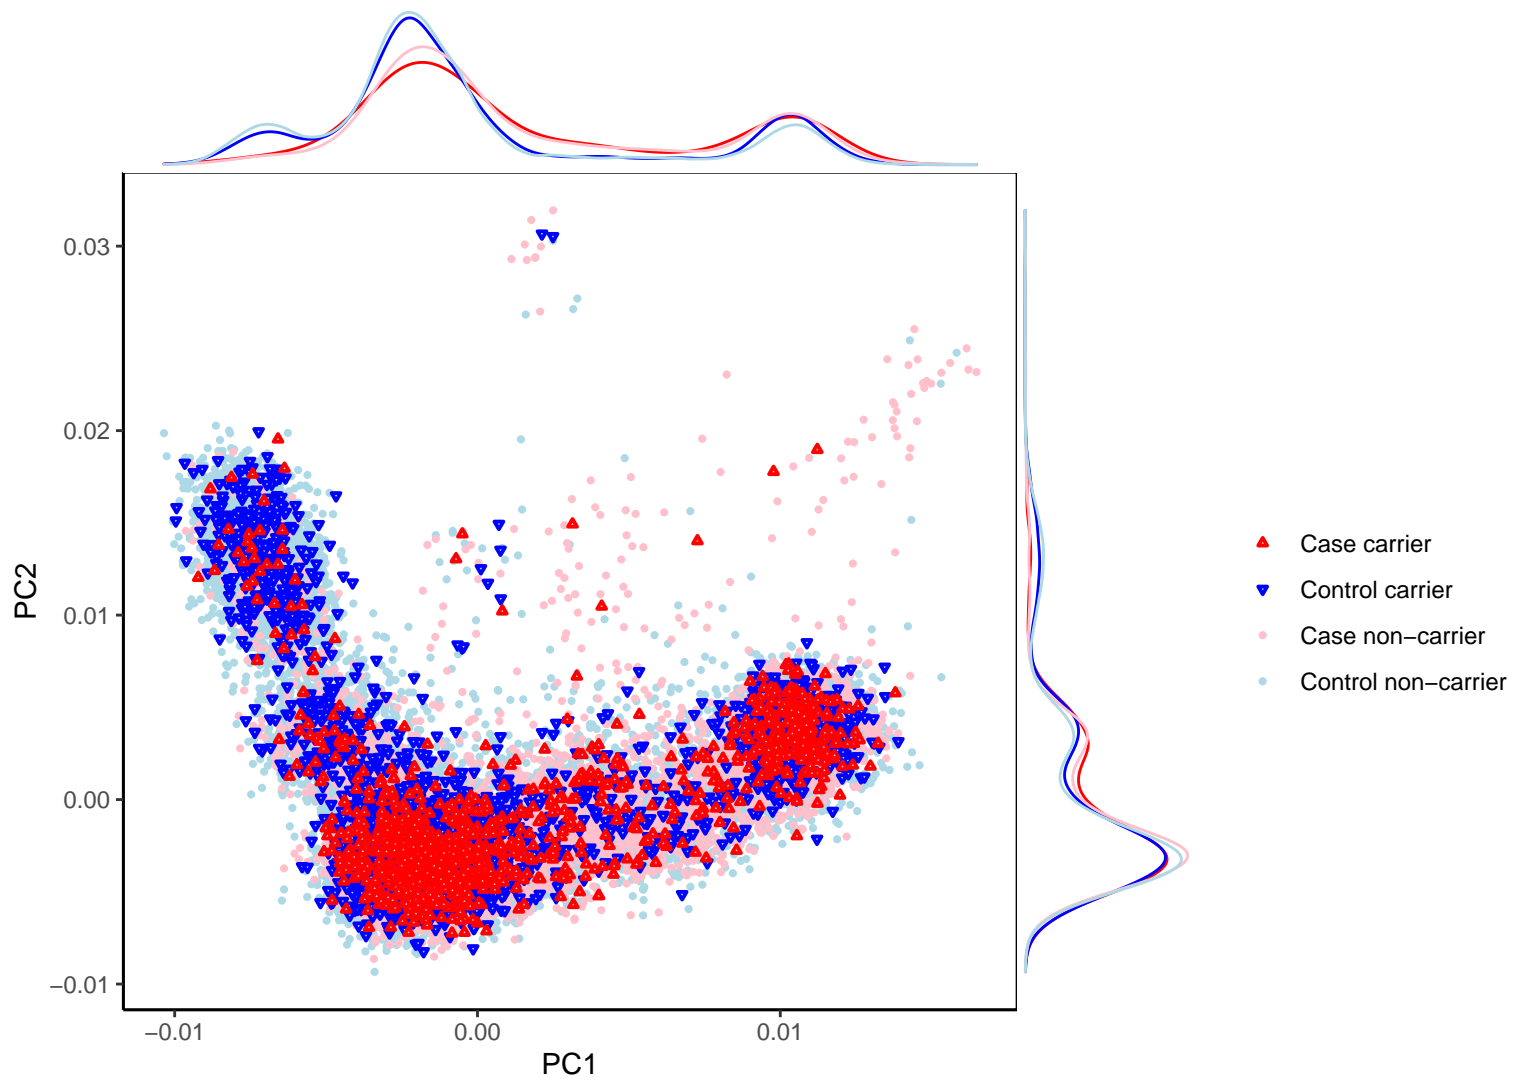

NEXTERA chr12.40346884\_A\_G

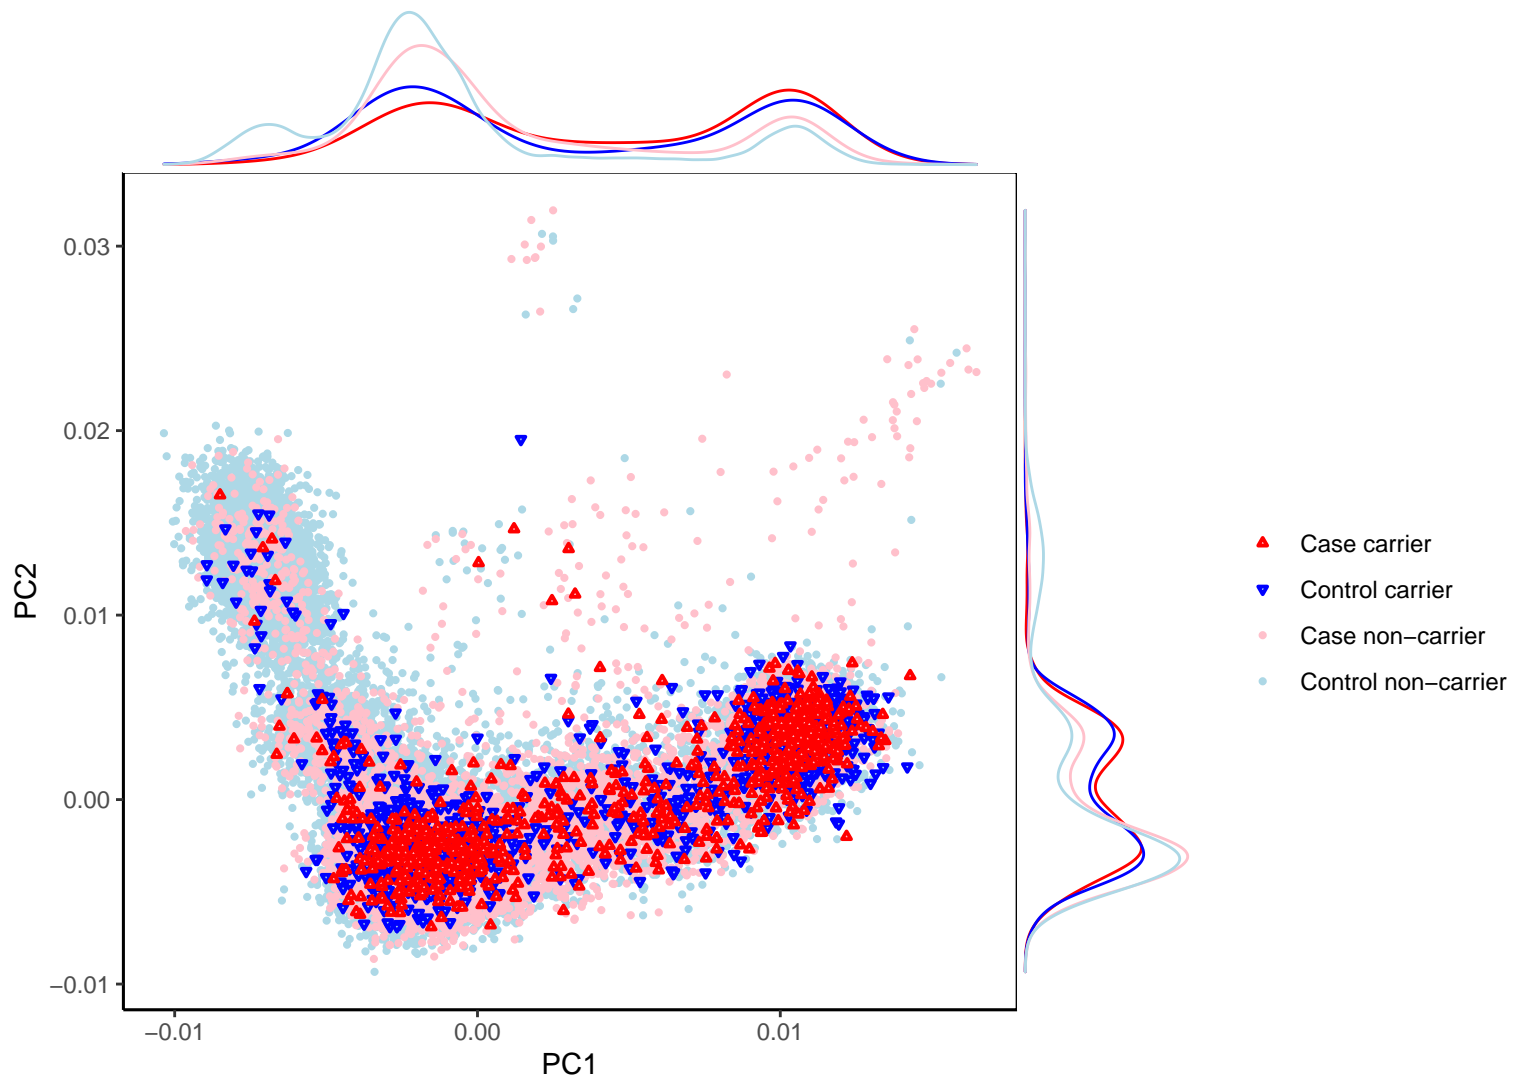

# NEXTERA chr16.50668046\_G\_A

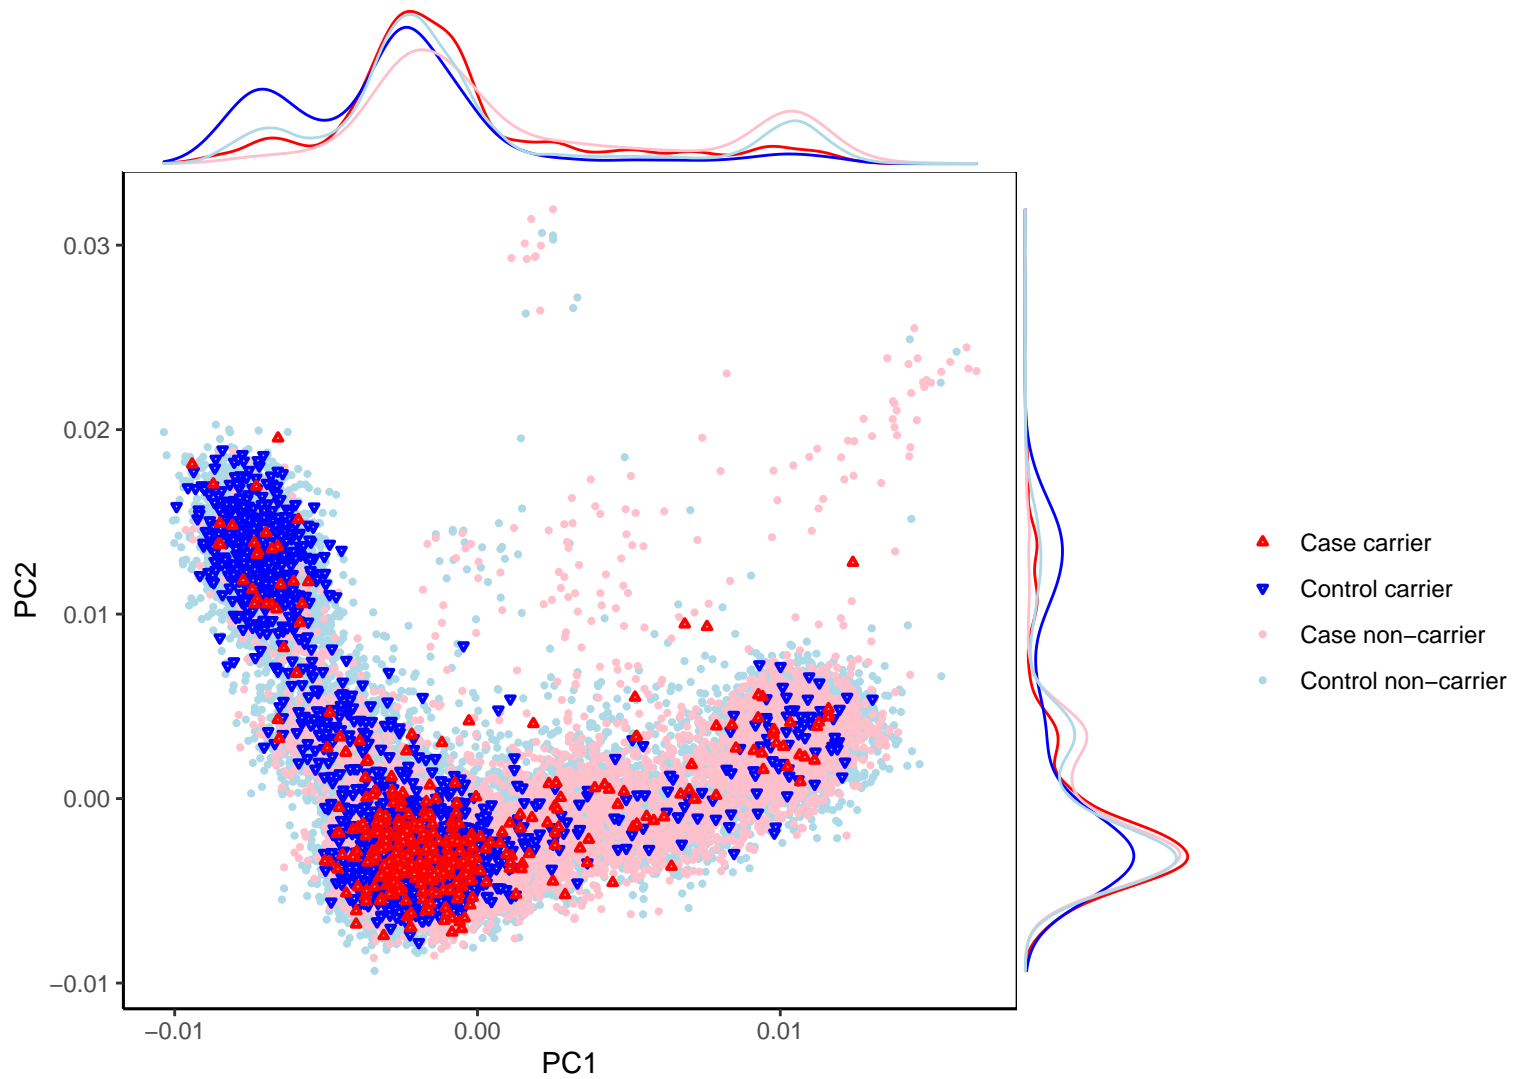

# NEXTERA chr16.50669105\_C\_T

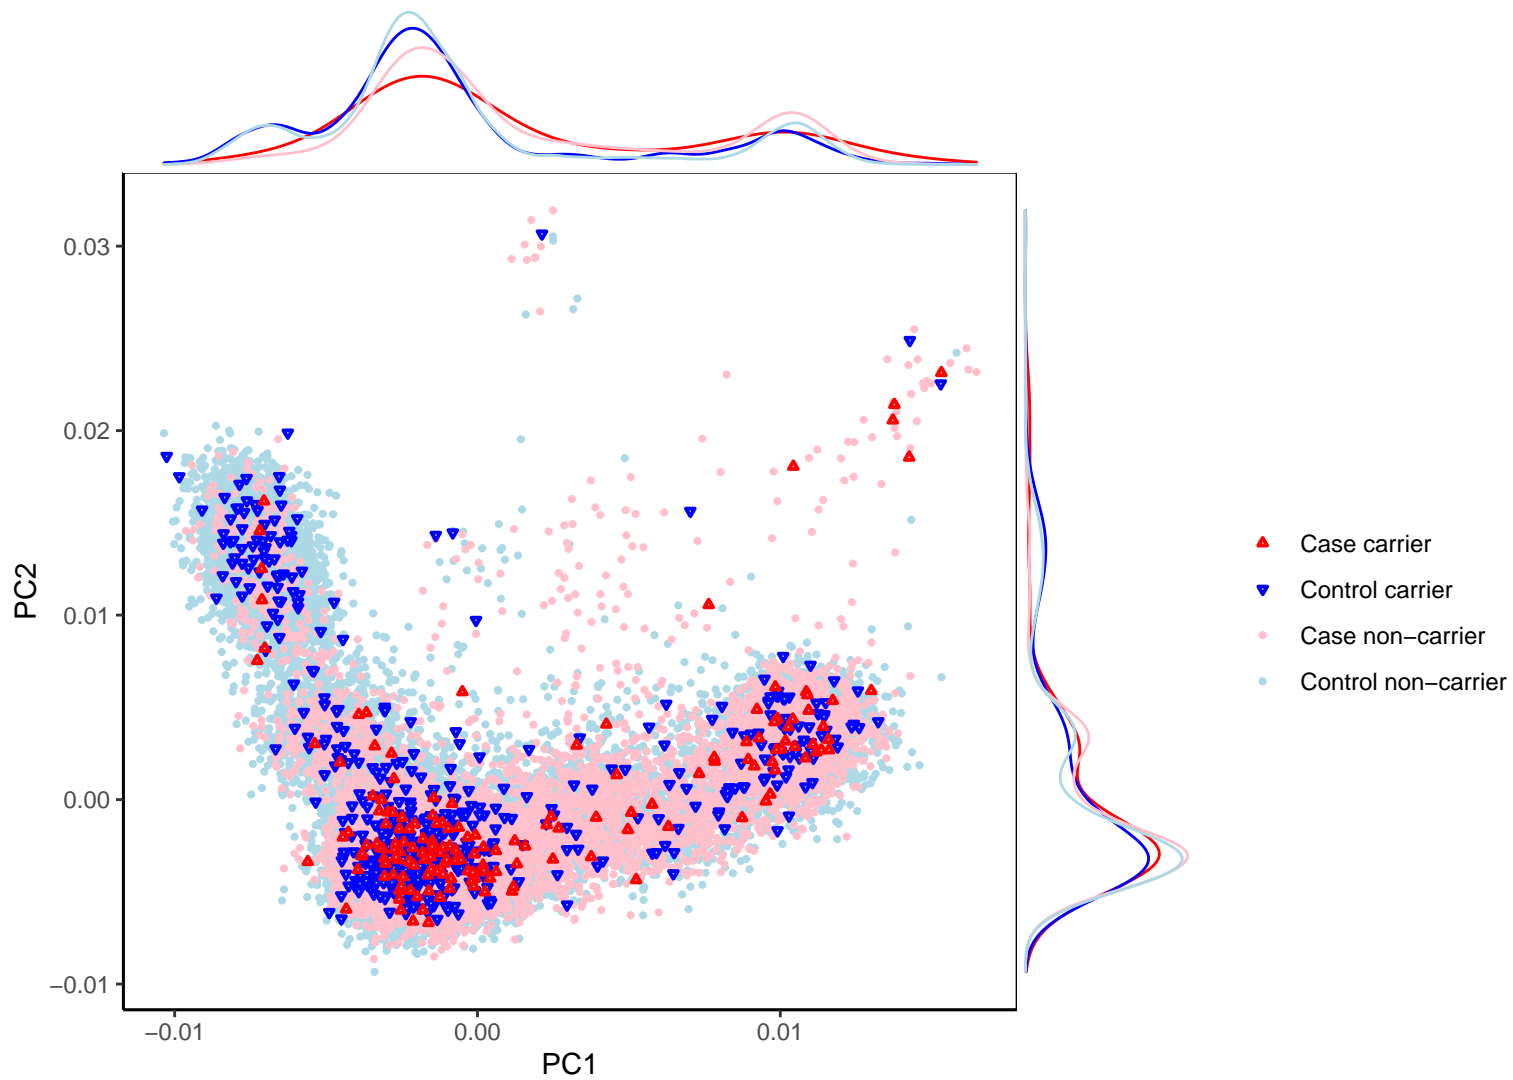

# NEXTERA chr16.50699481\_T\_A

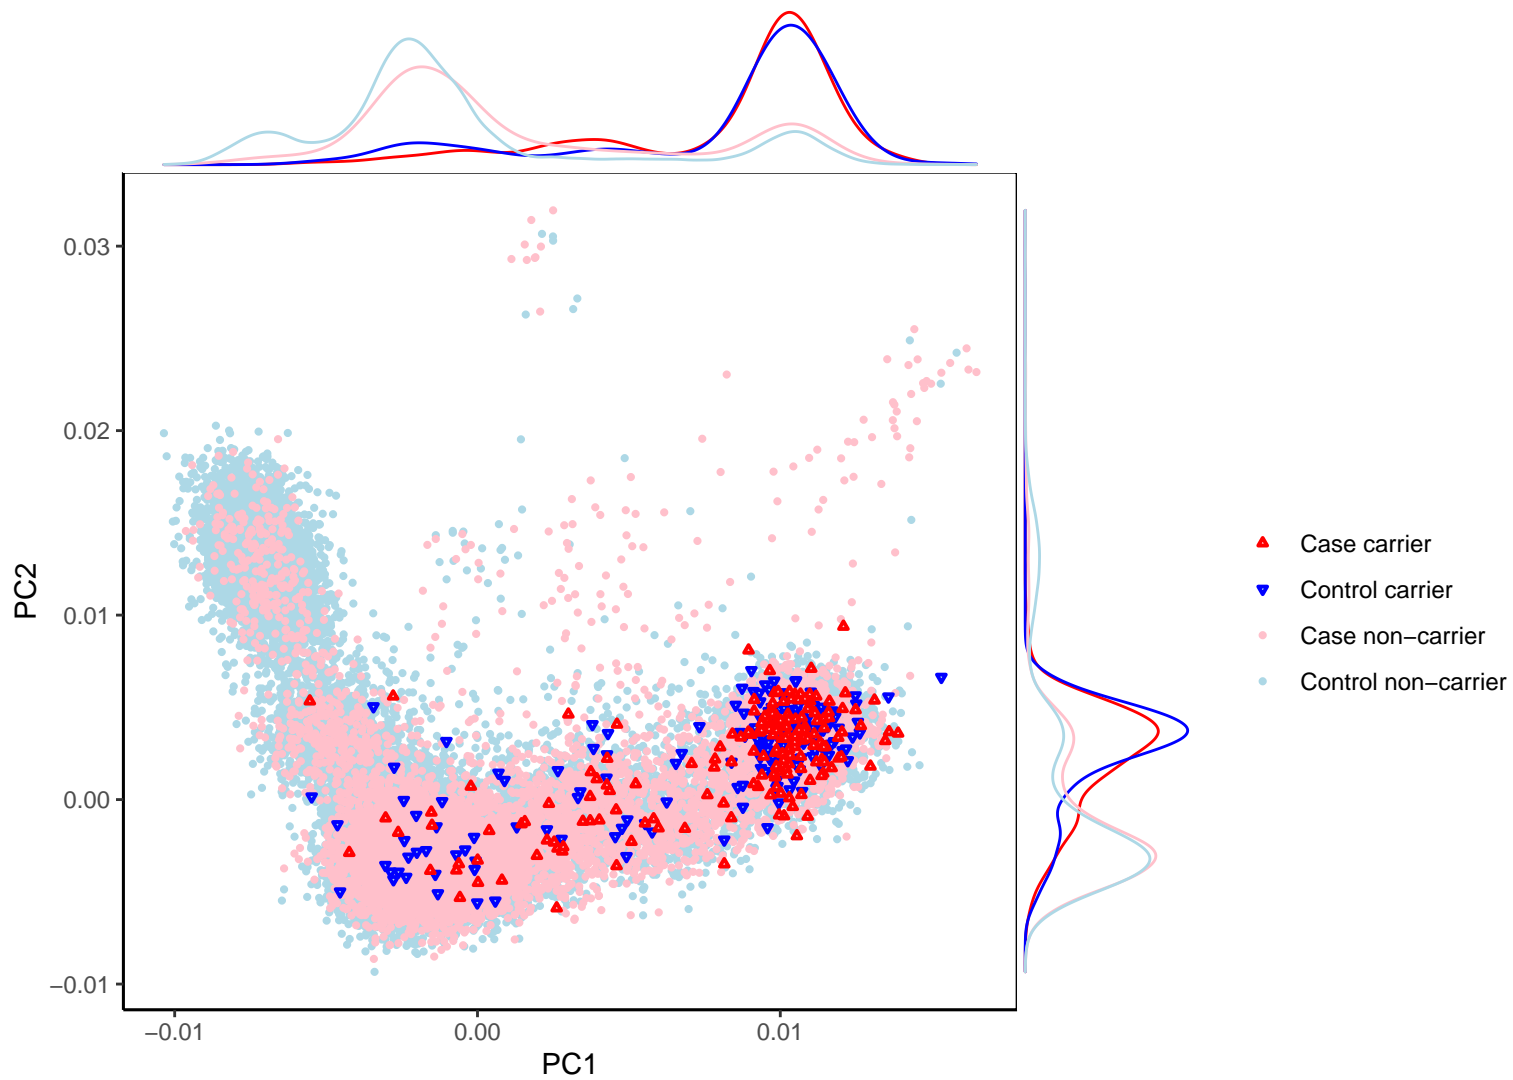

# NEXTERA chr16.50699554\_C\_T

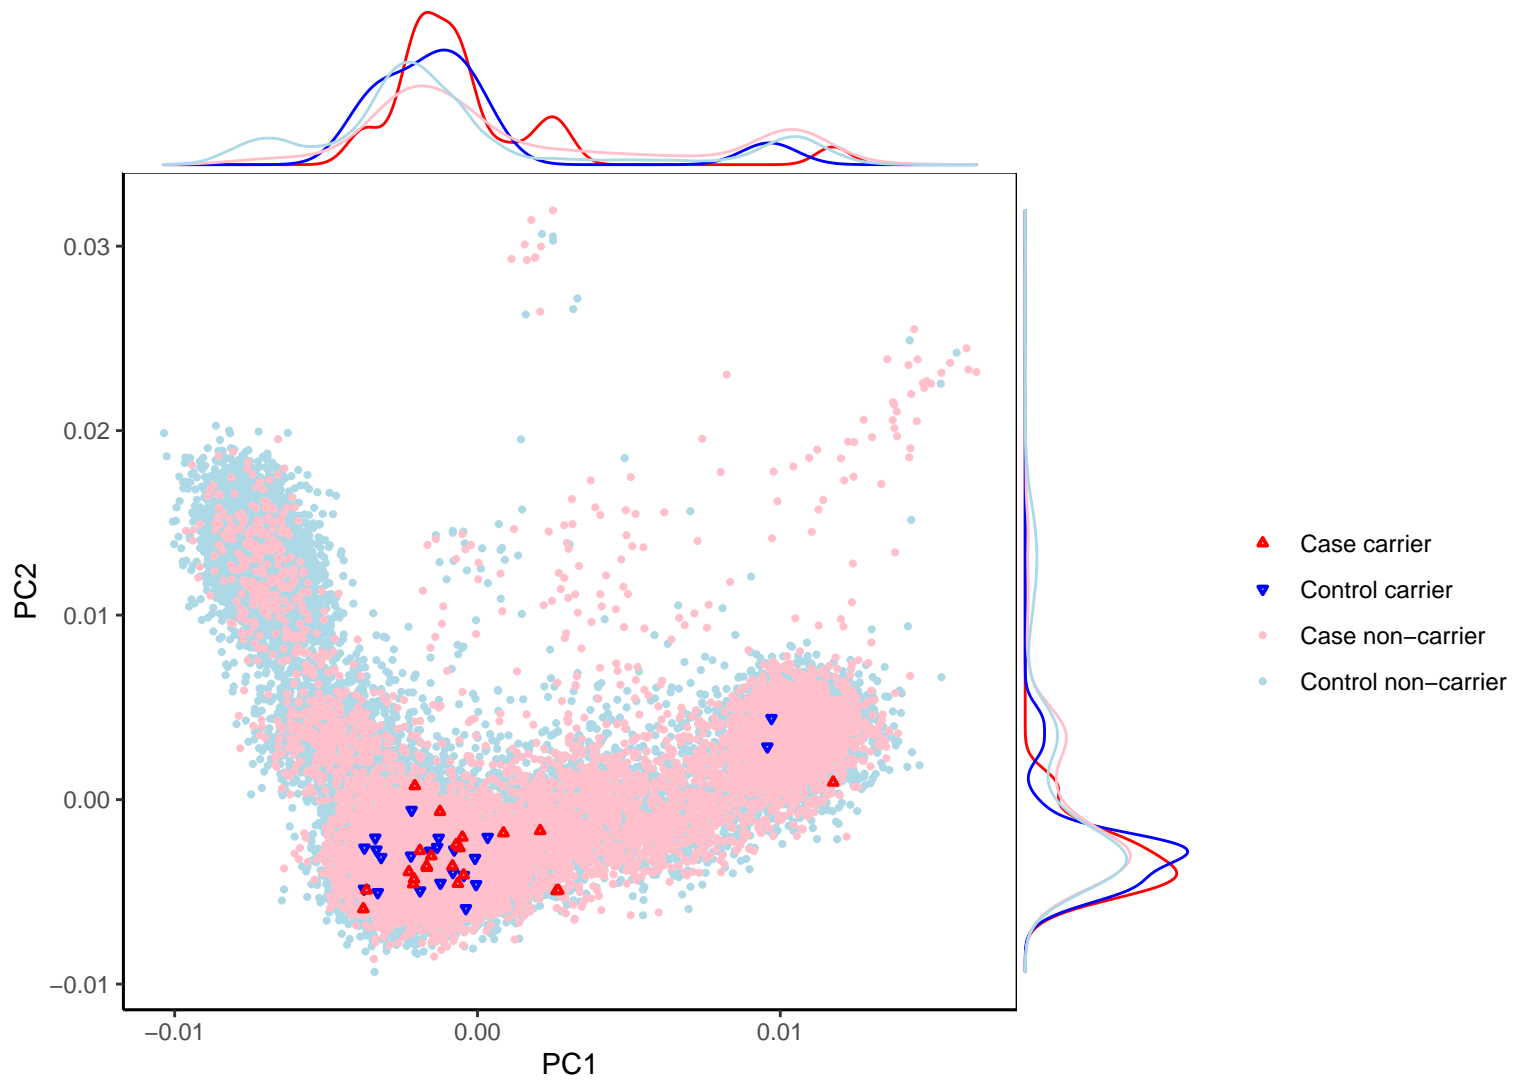

# NEXTERA chr16.50710654\_T\_G

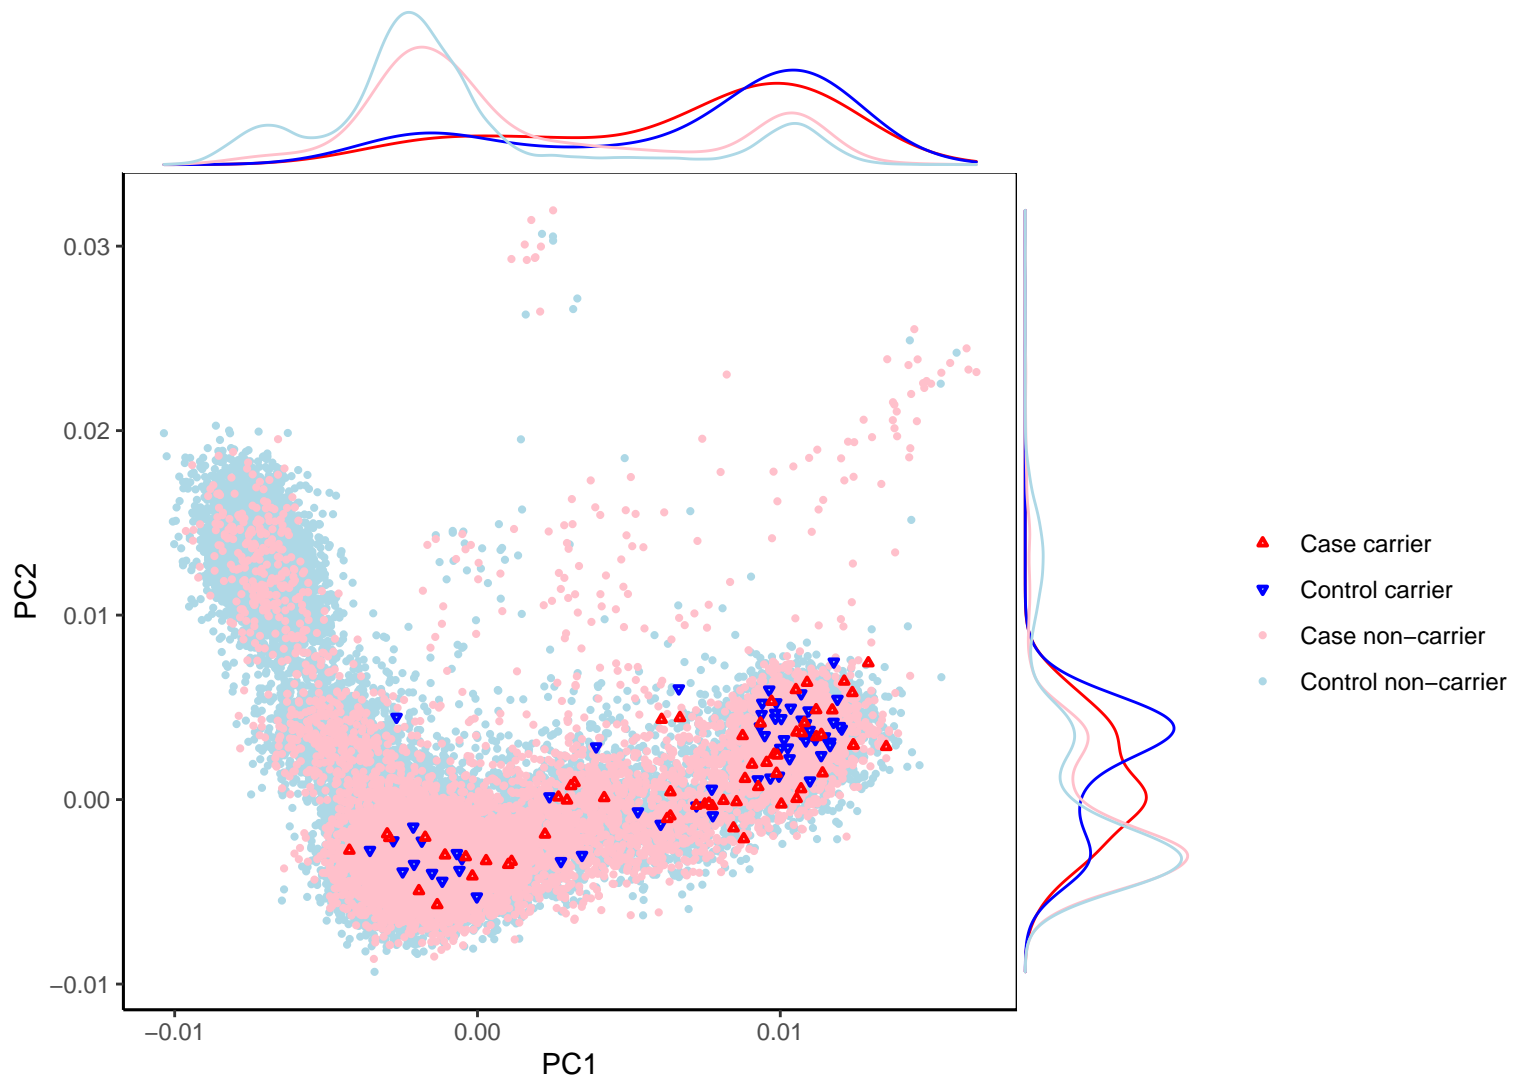

# NEXTERA chr16.50711203\_C\_T

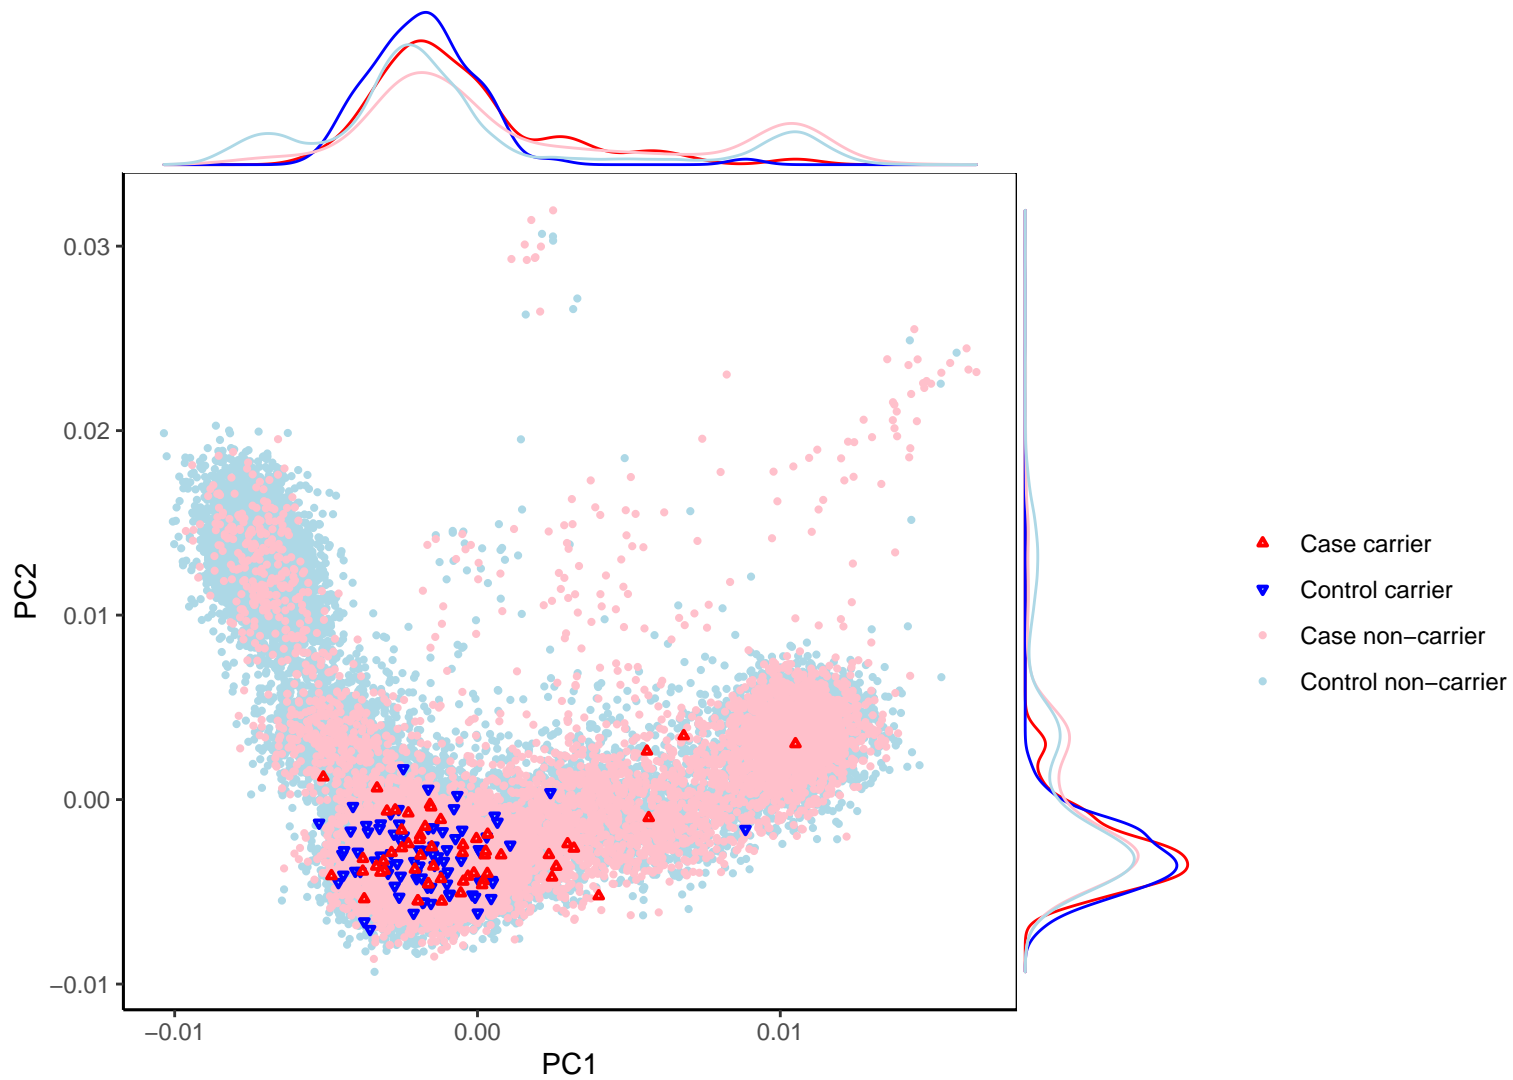



# NEXTERA chr16.50711745\_G\_A

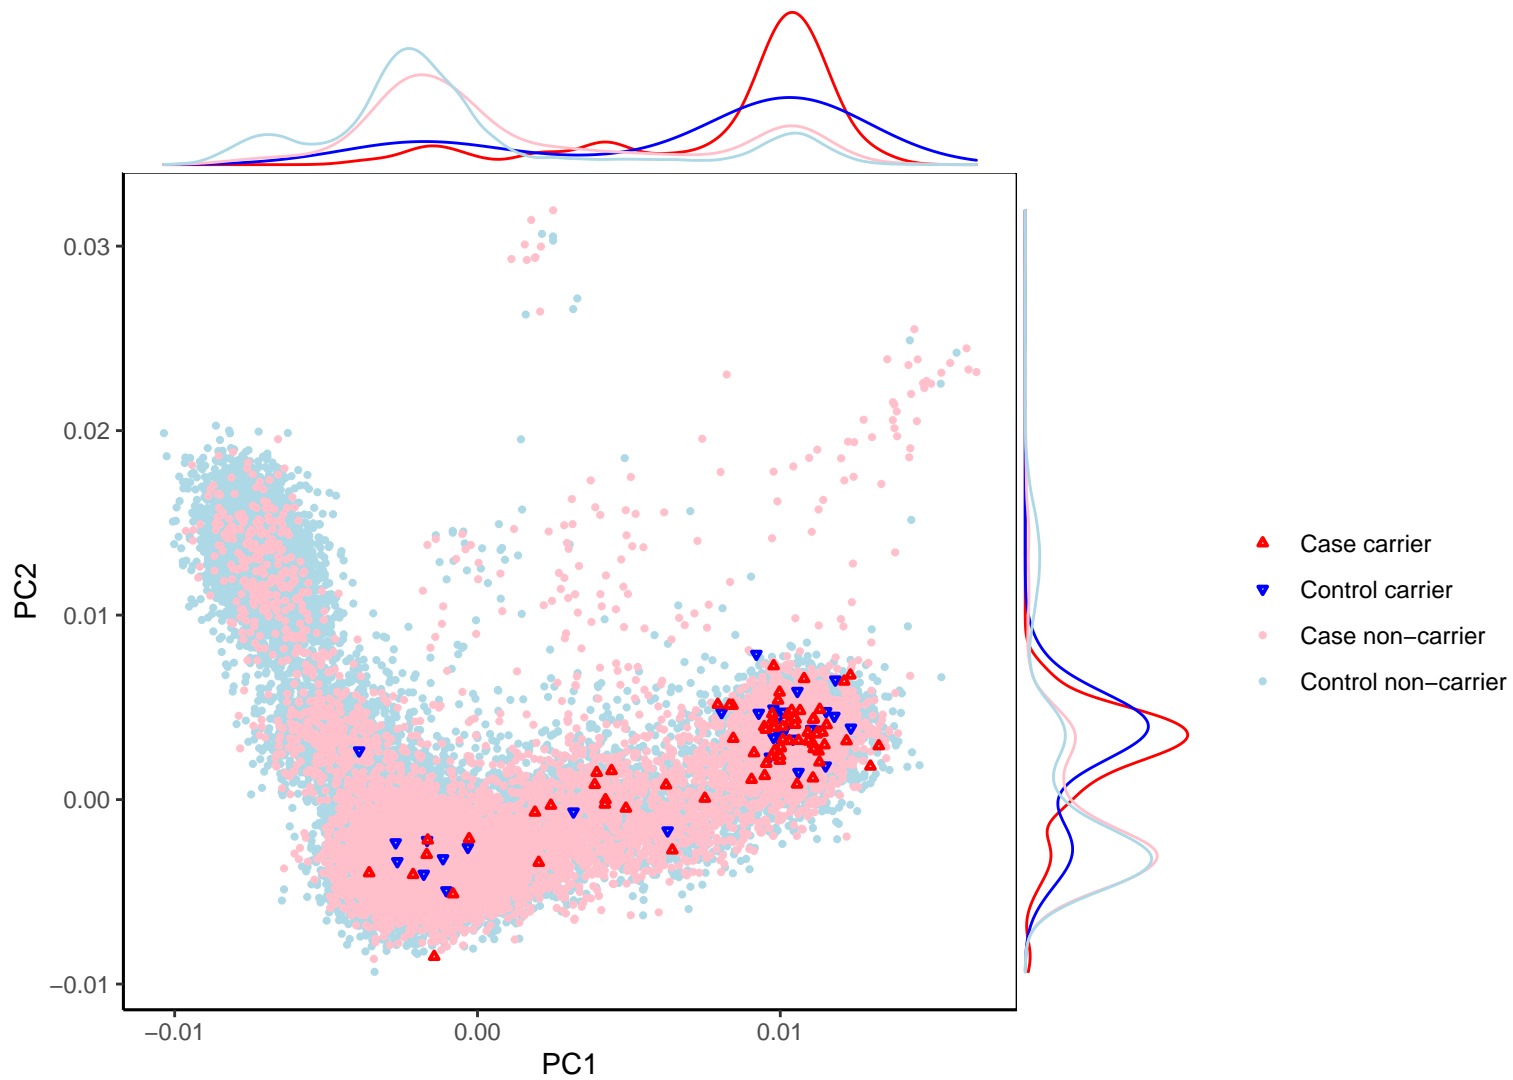

# NEXTERA chr16.50712015\_C\_T

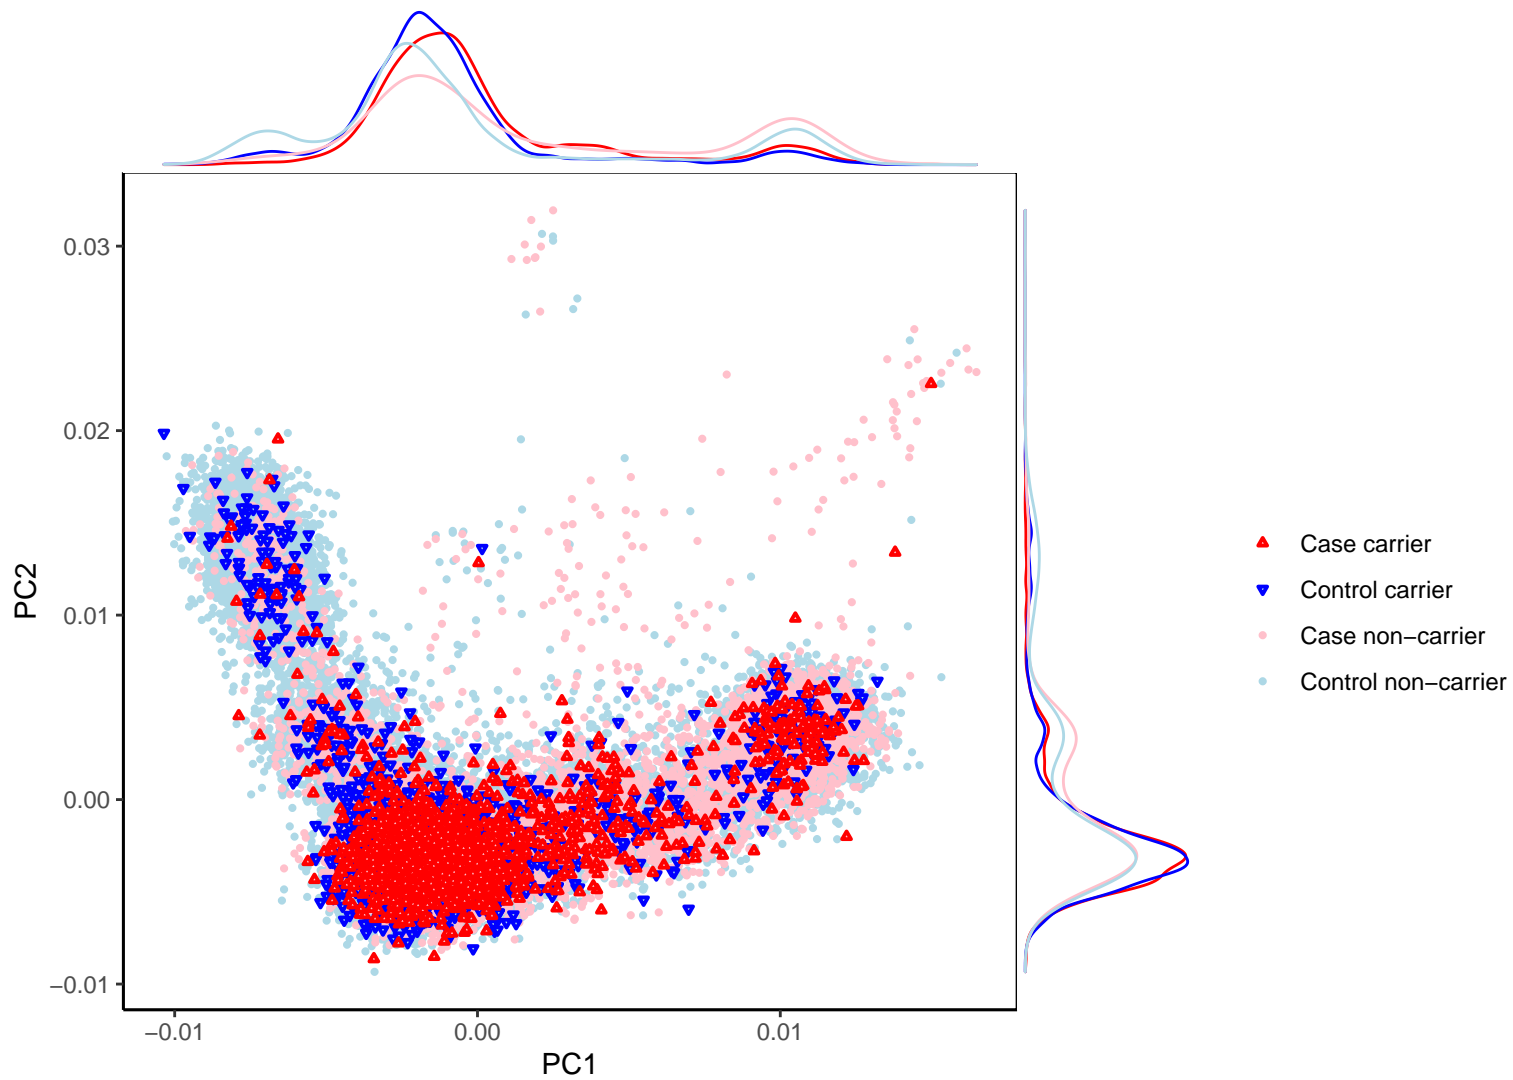

# NEXTERA chr16.50712018\_C\_T

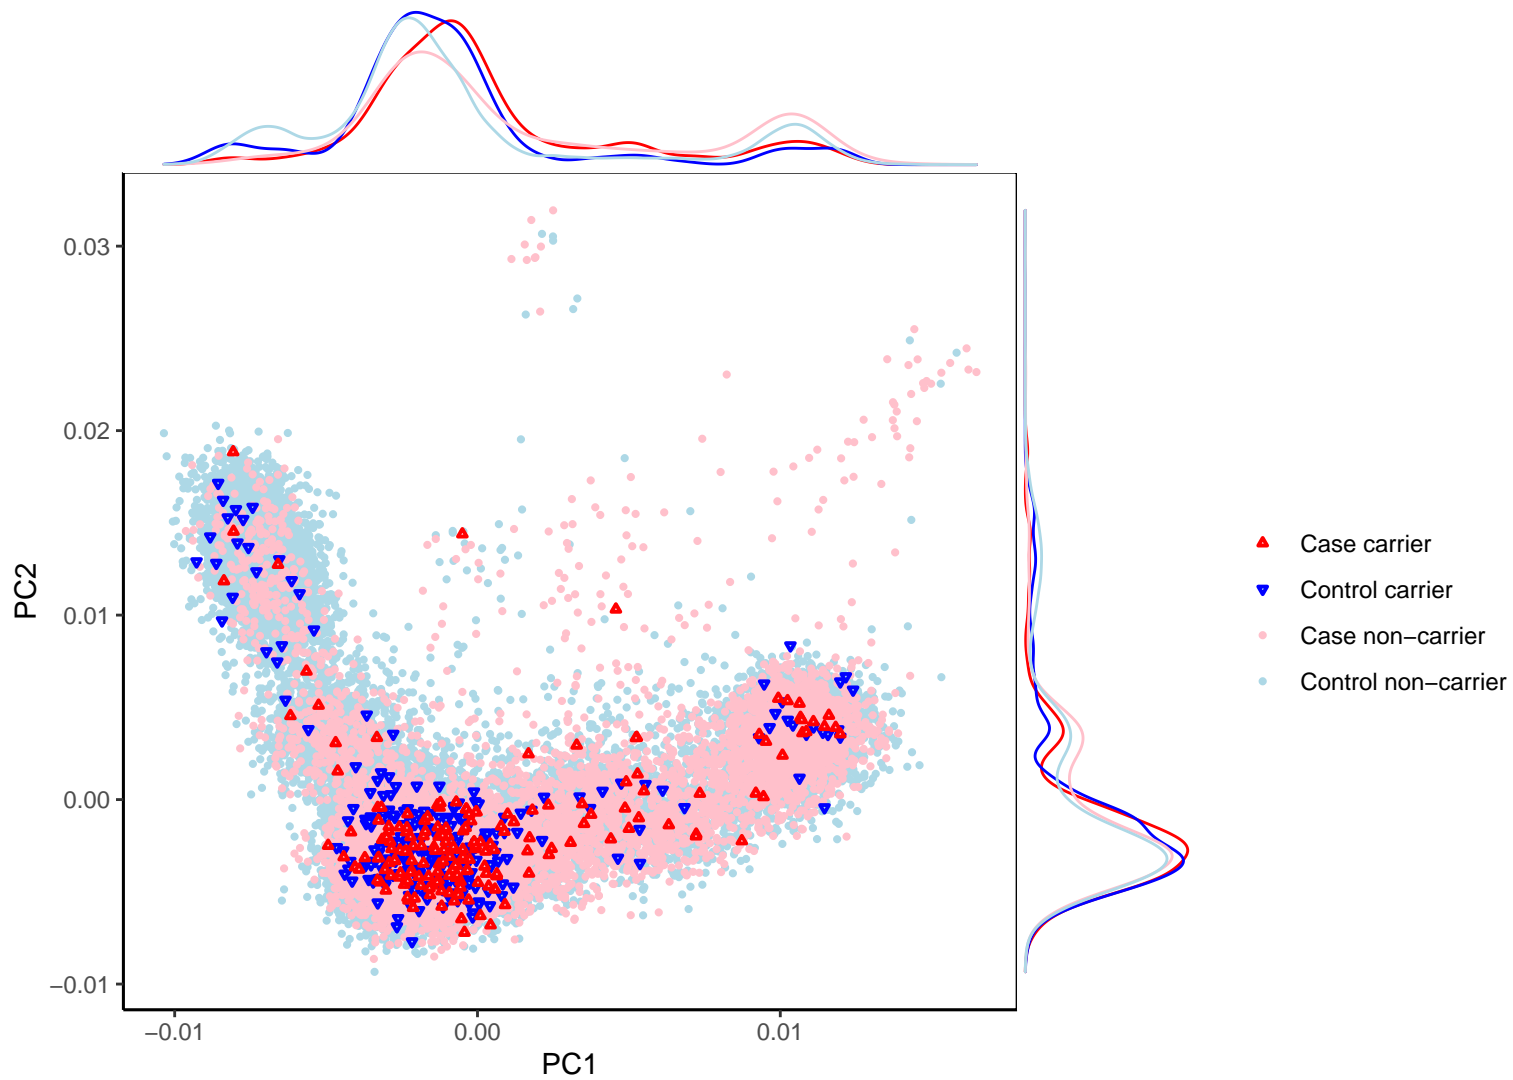

# NEXTERA chr16.50712175\_C\_T

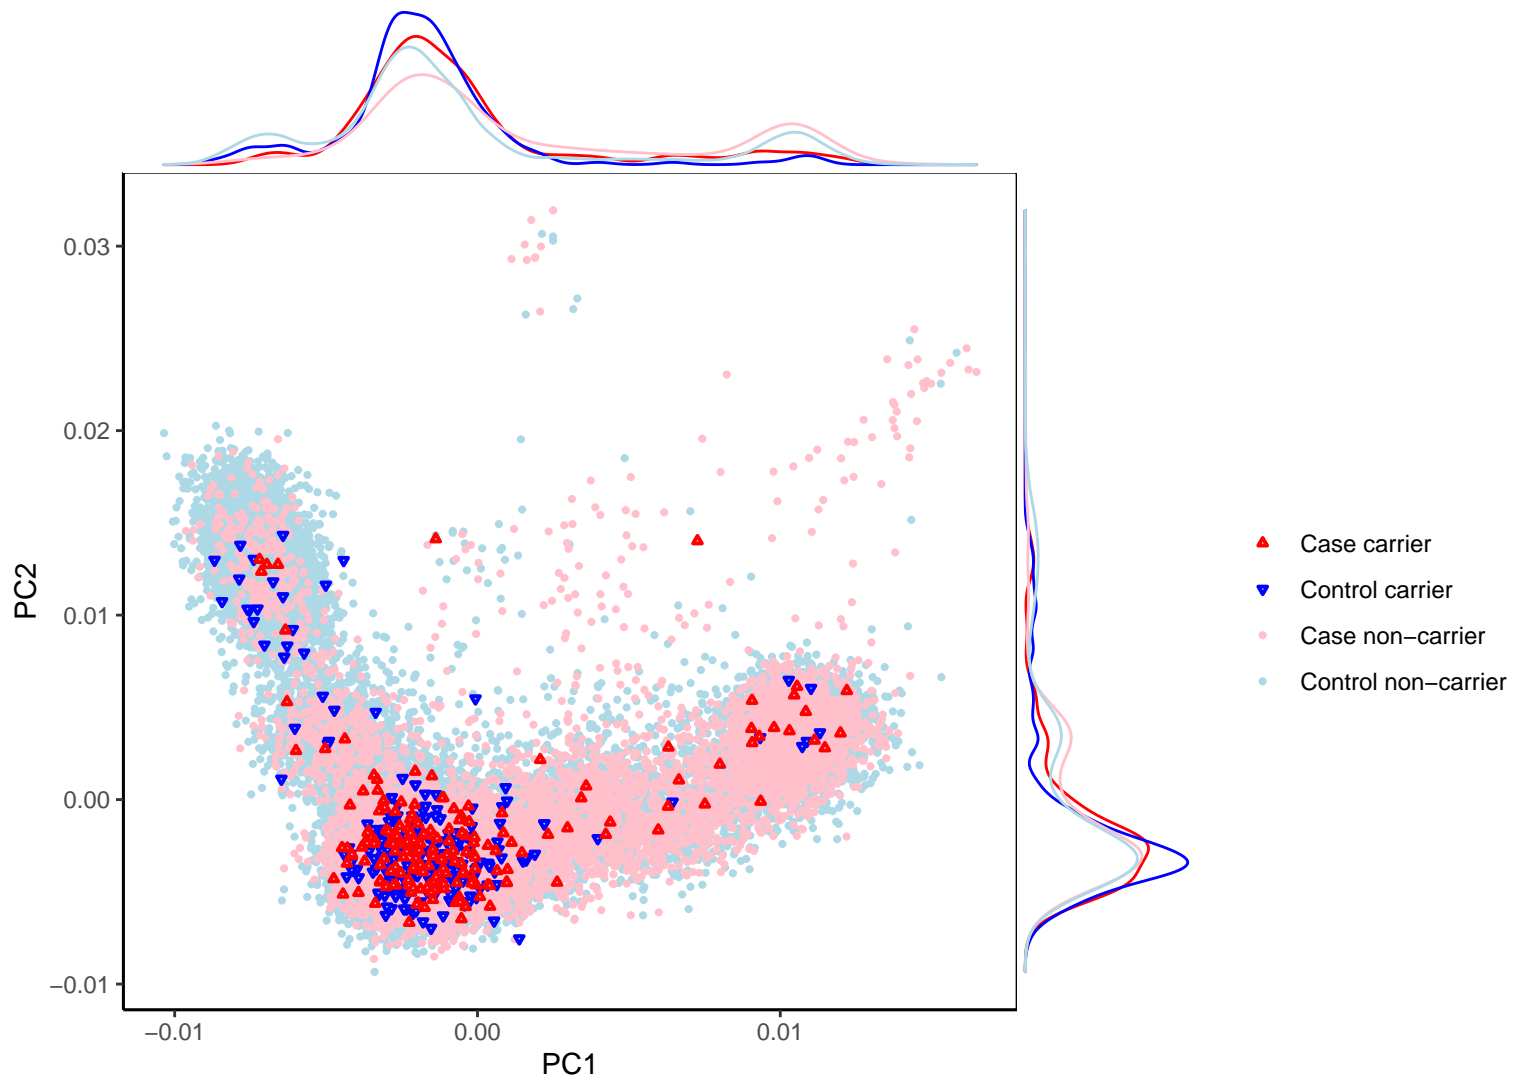

# NEXTERA chr16.50712243\_G\_A

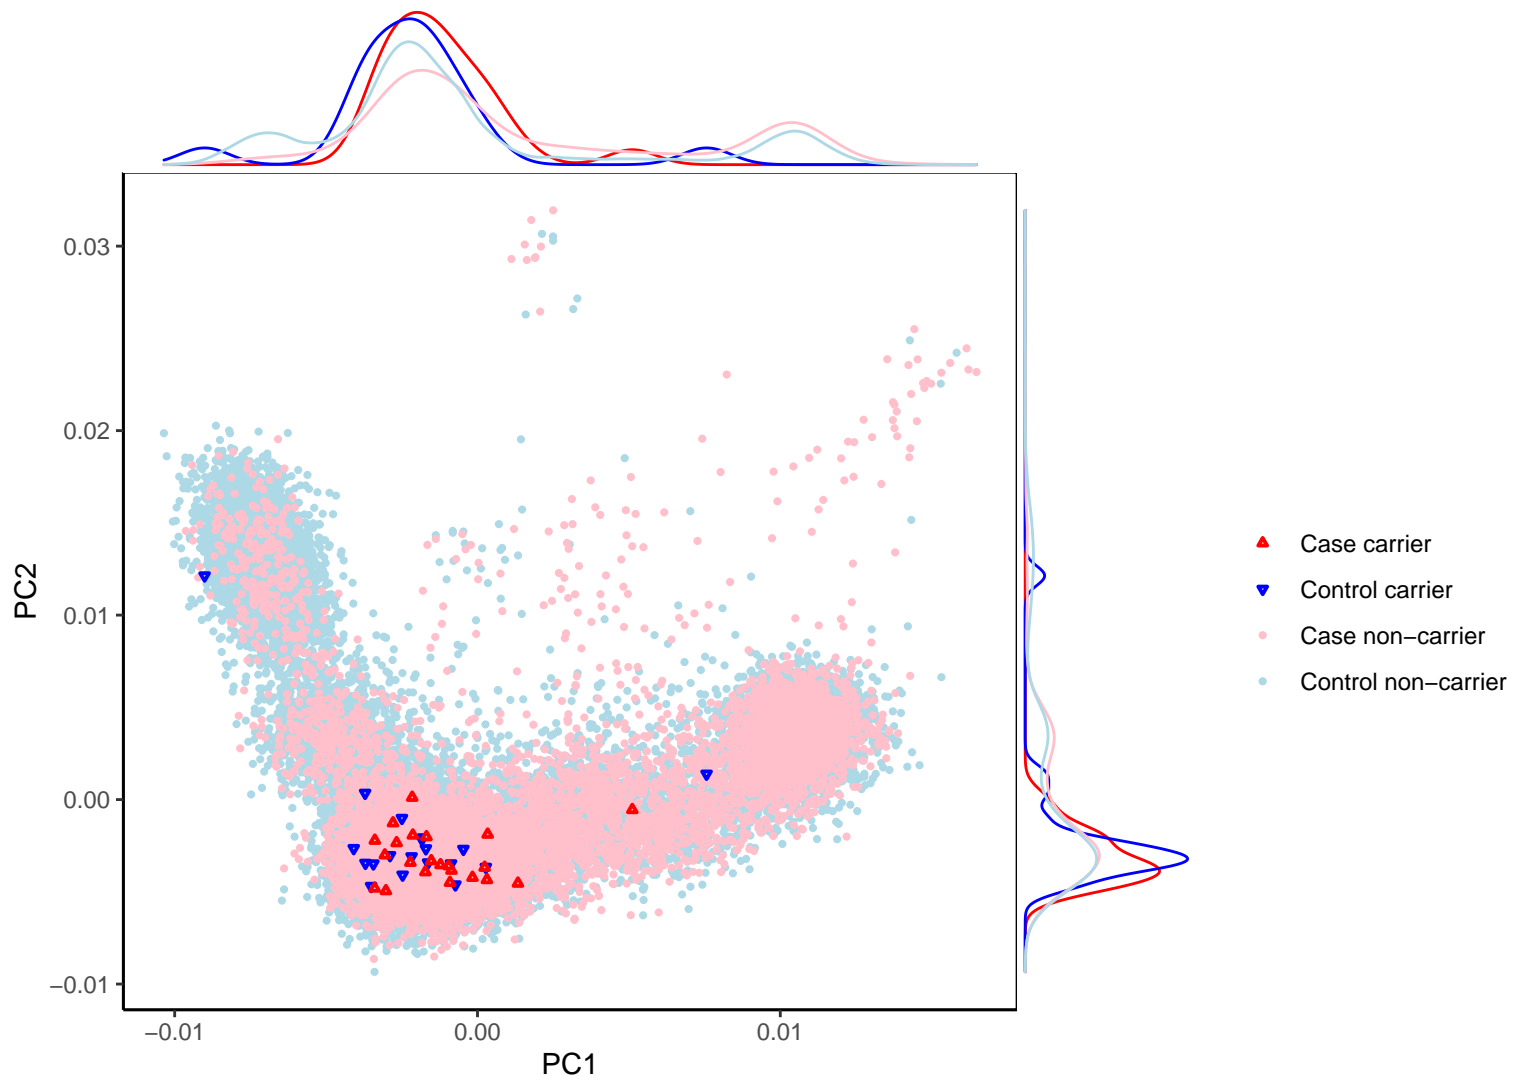

# NEXTERA chr16.50716671\_G\_GT

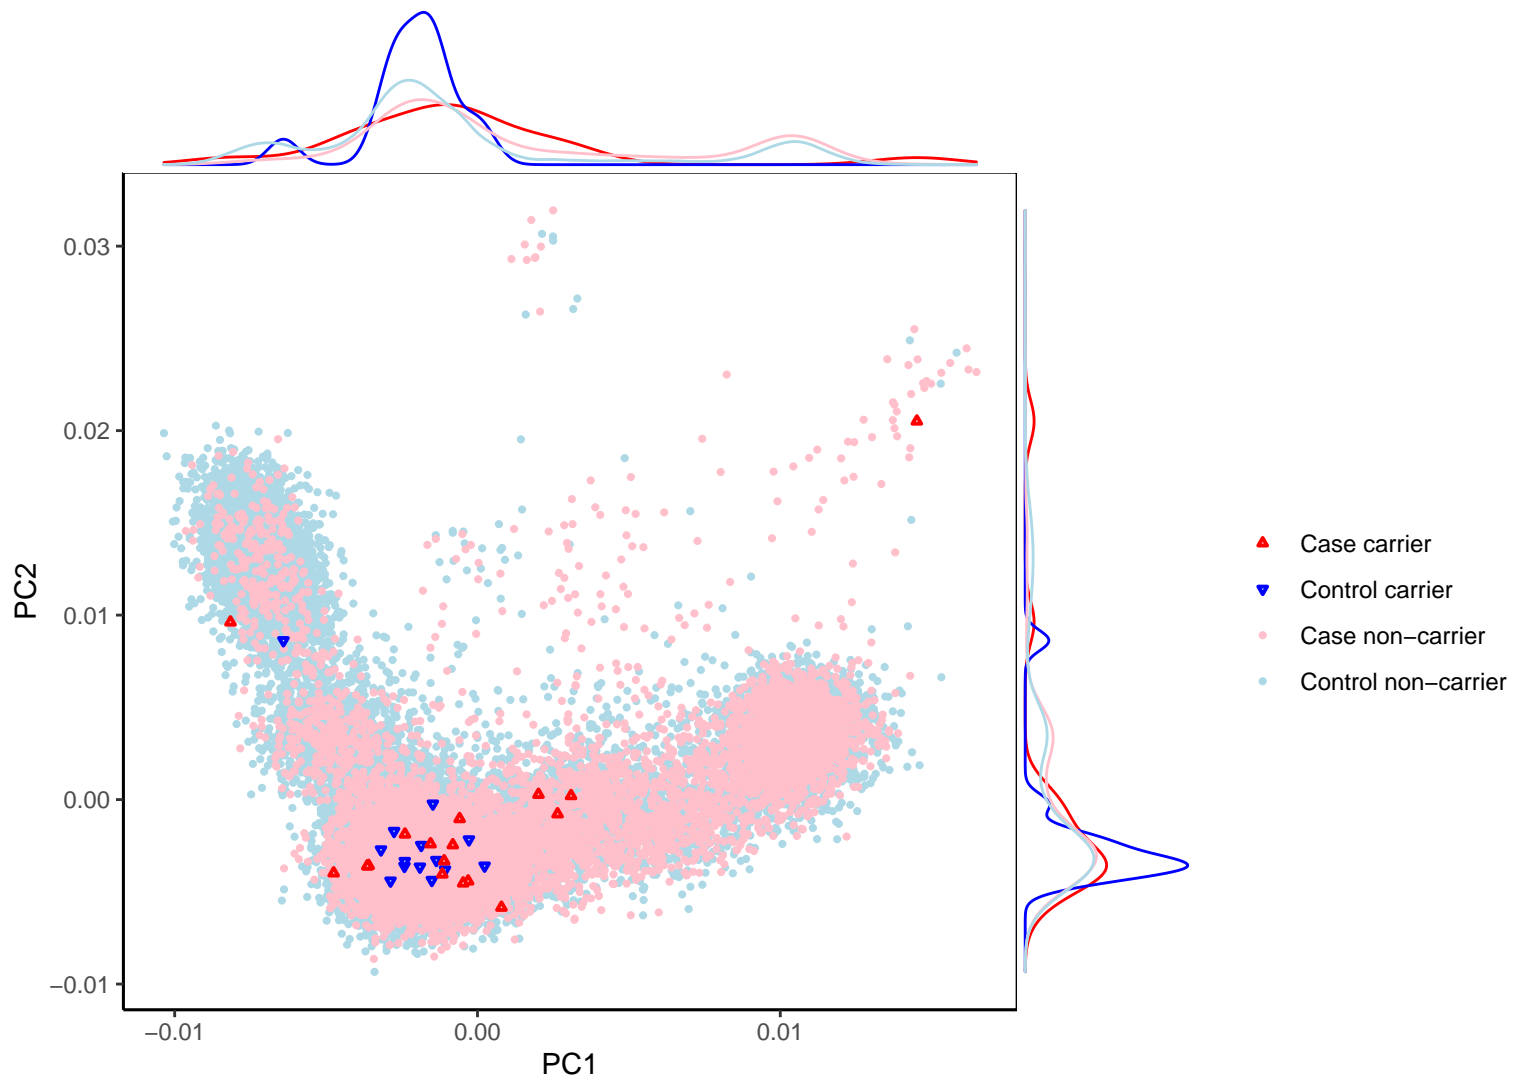

# NEXTERA chr16.50716899\_A\_G

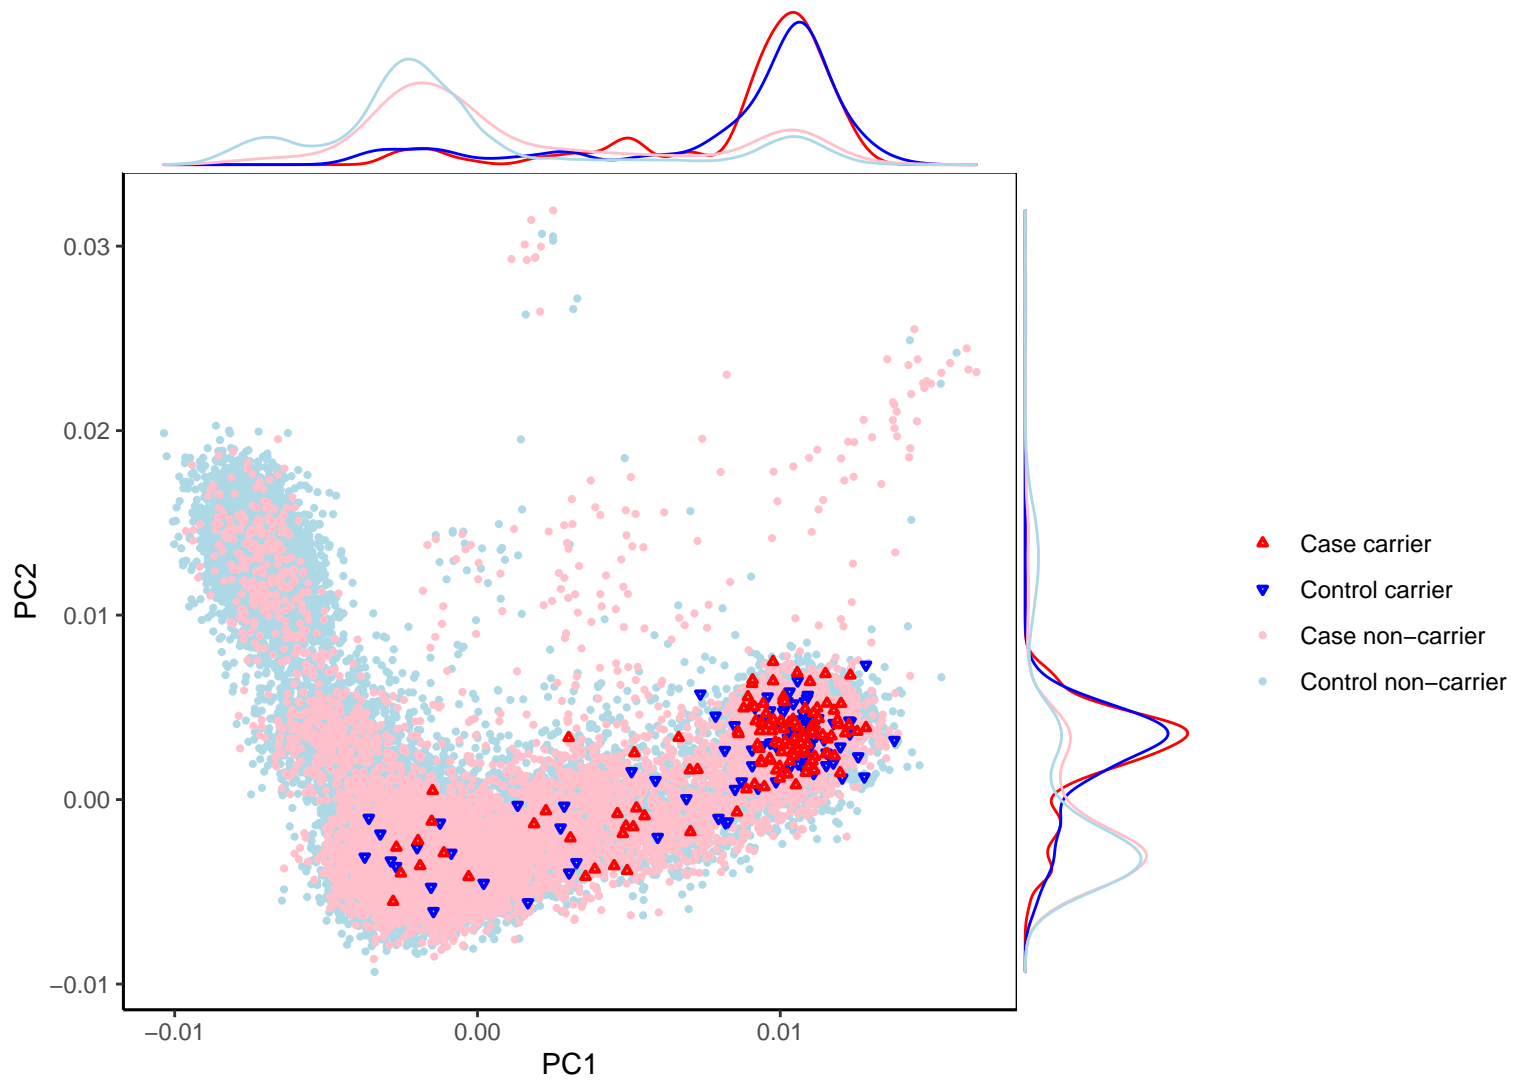

# NEXTERA chr16.50716931\_A\_G

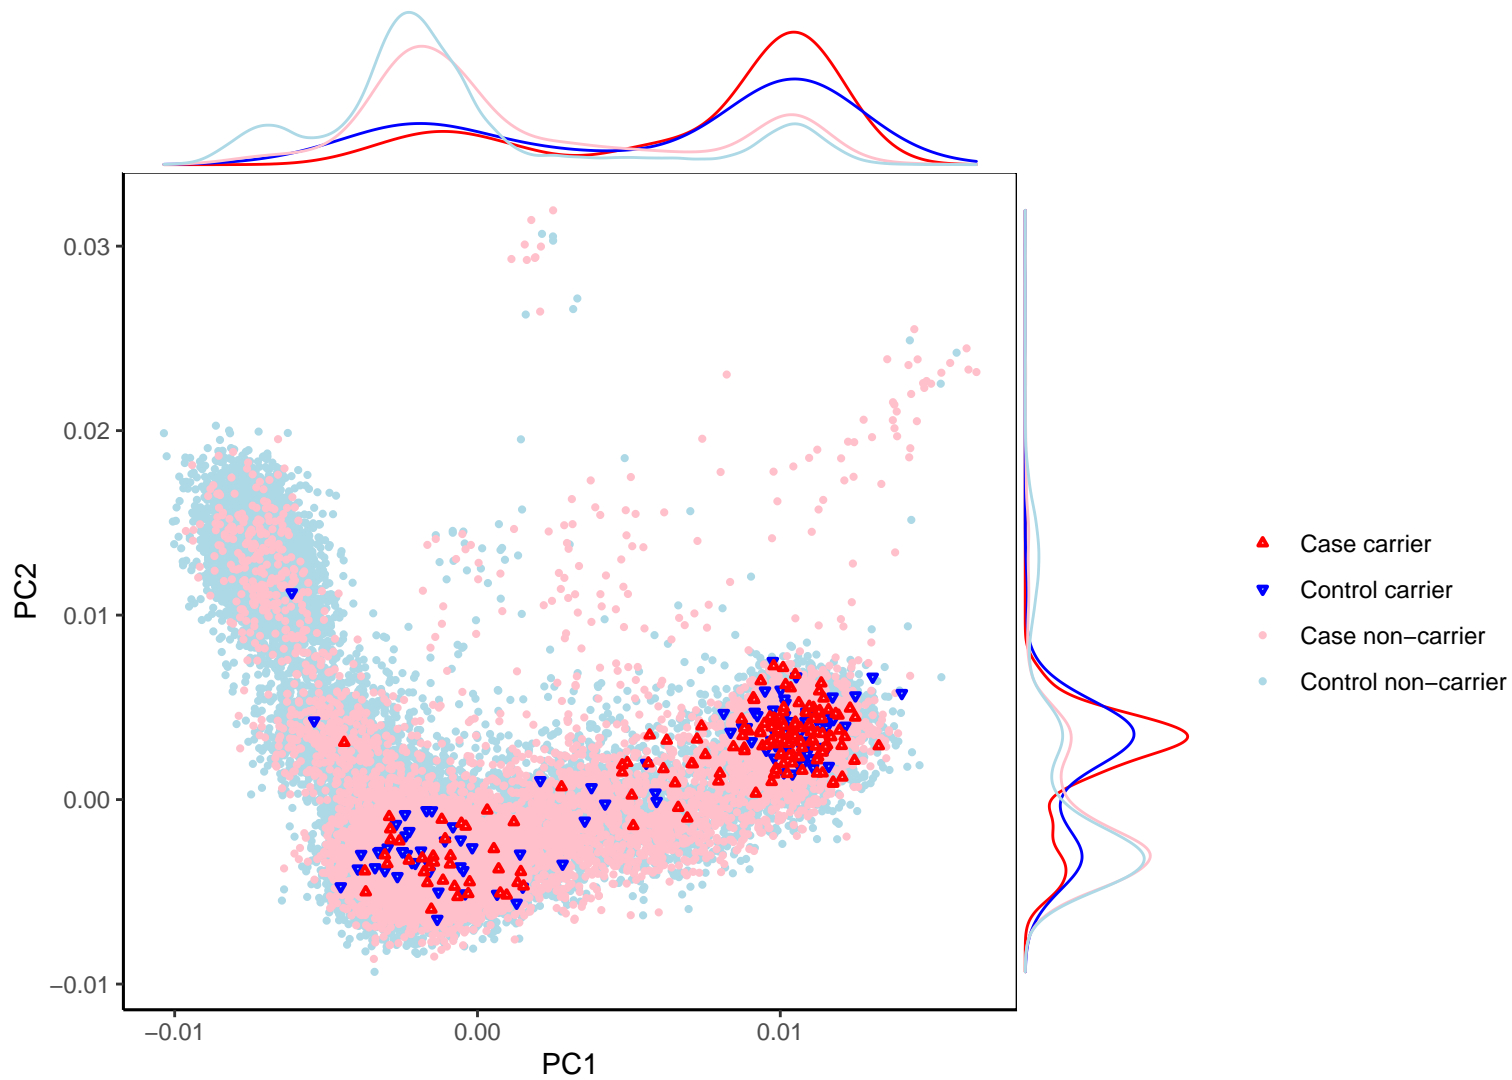



# NEXTERA chr16.50722629\_G\_C

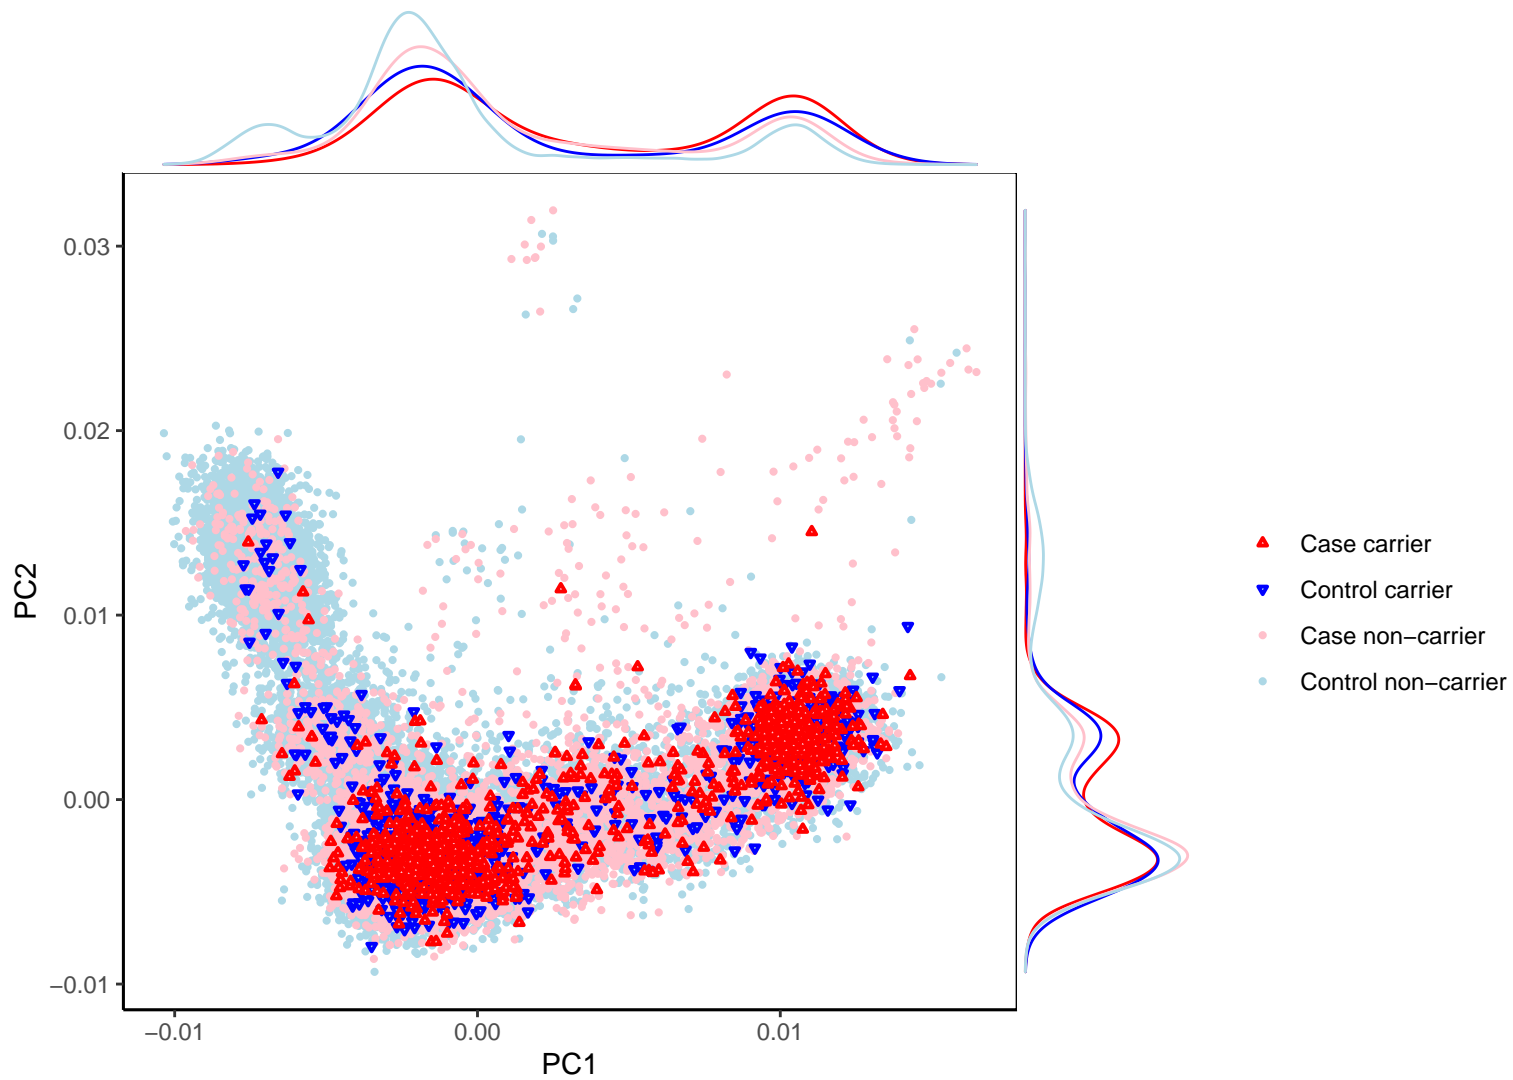

# NEXTERA chr16.50723365\_G\_A

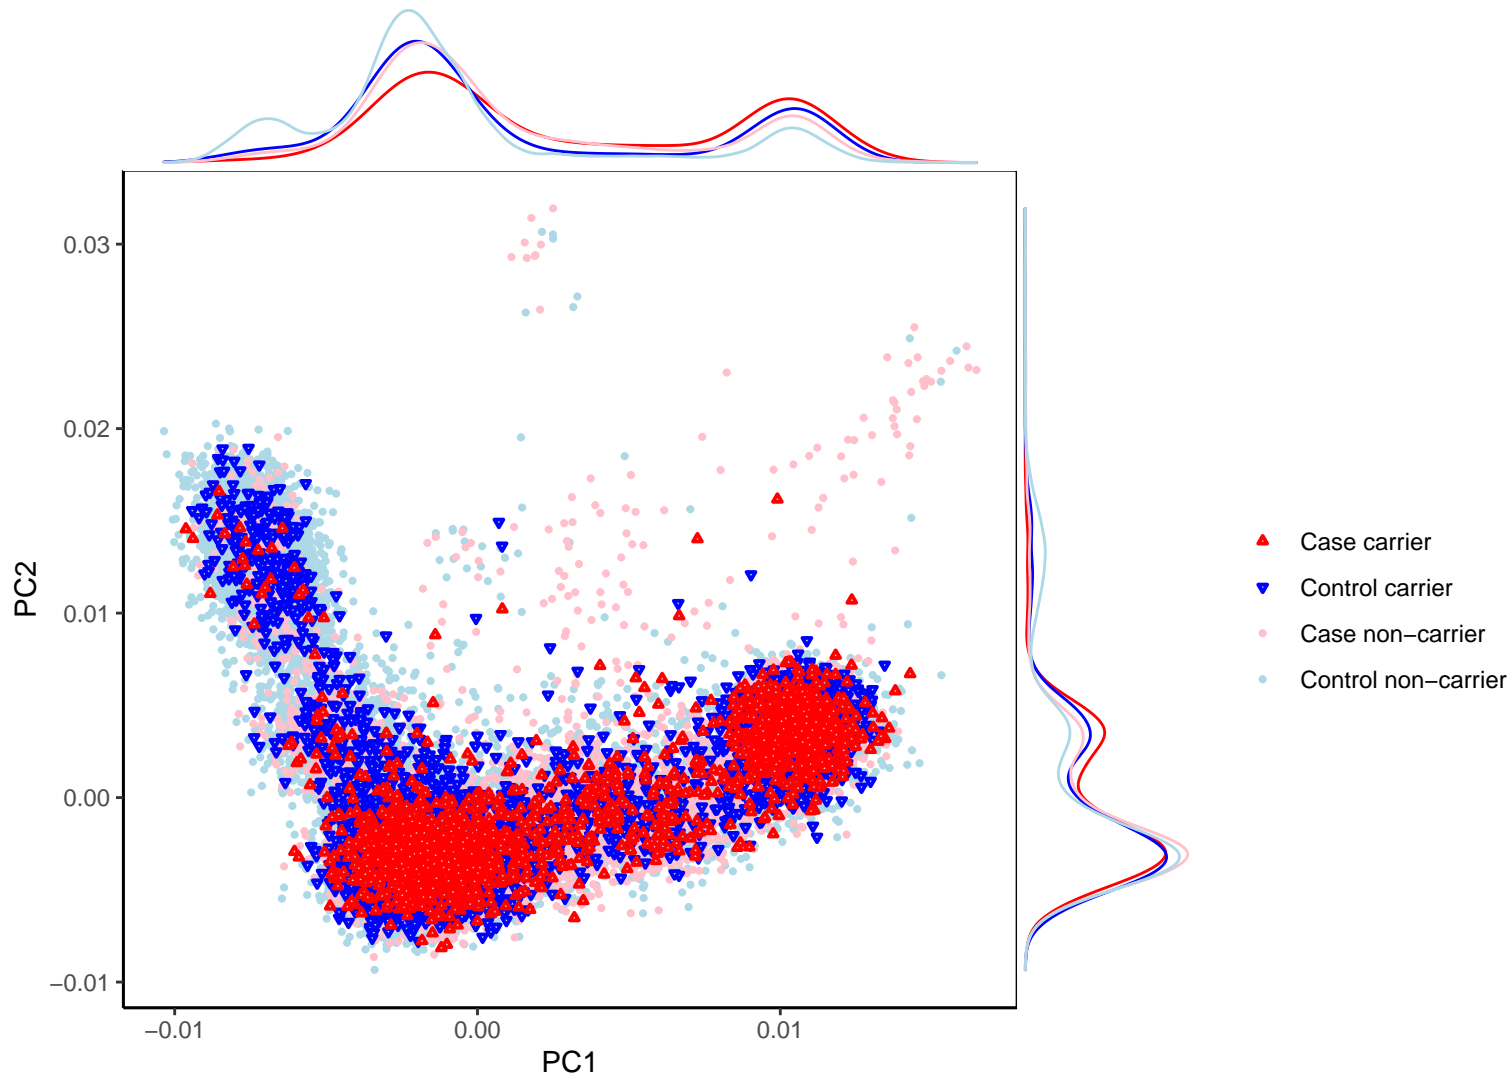

# NEXTERA chr16.50729867\_G\_GC

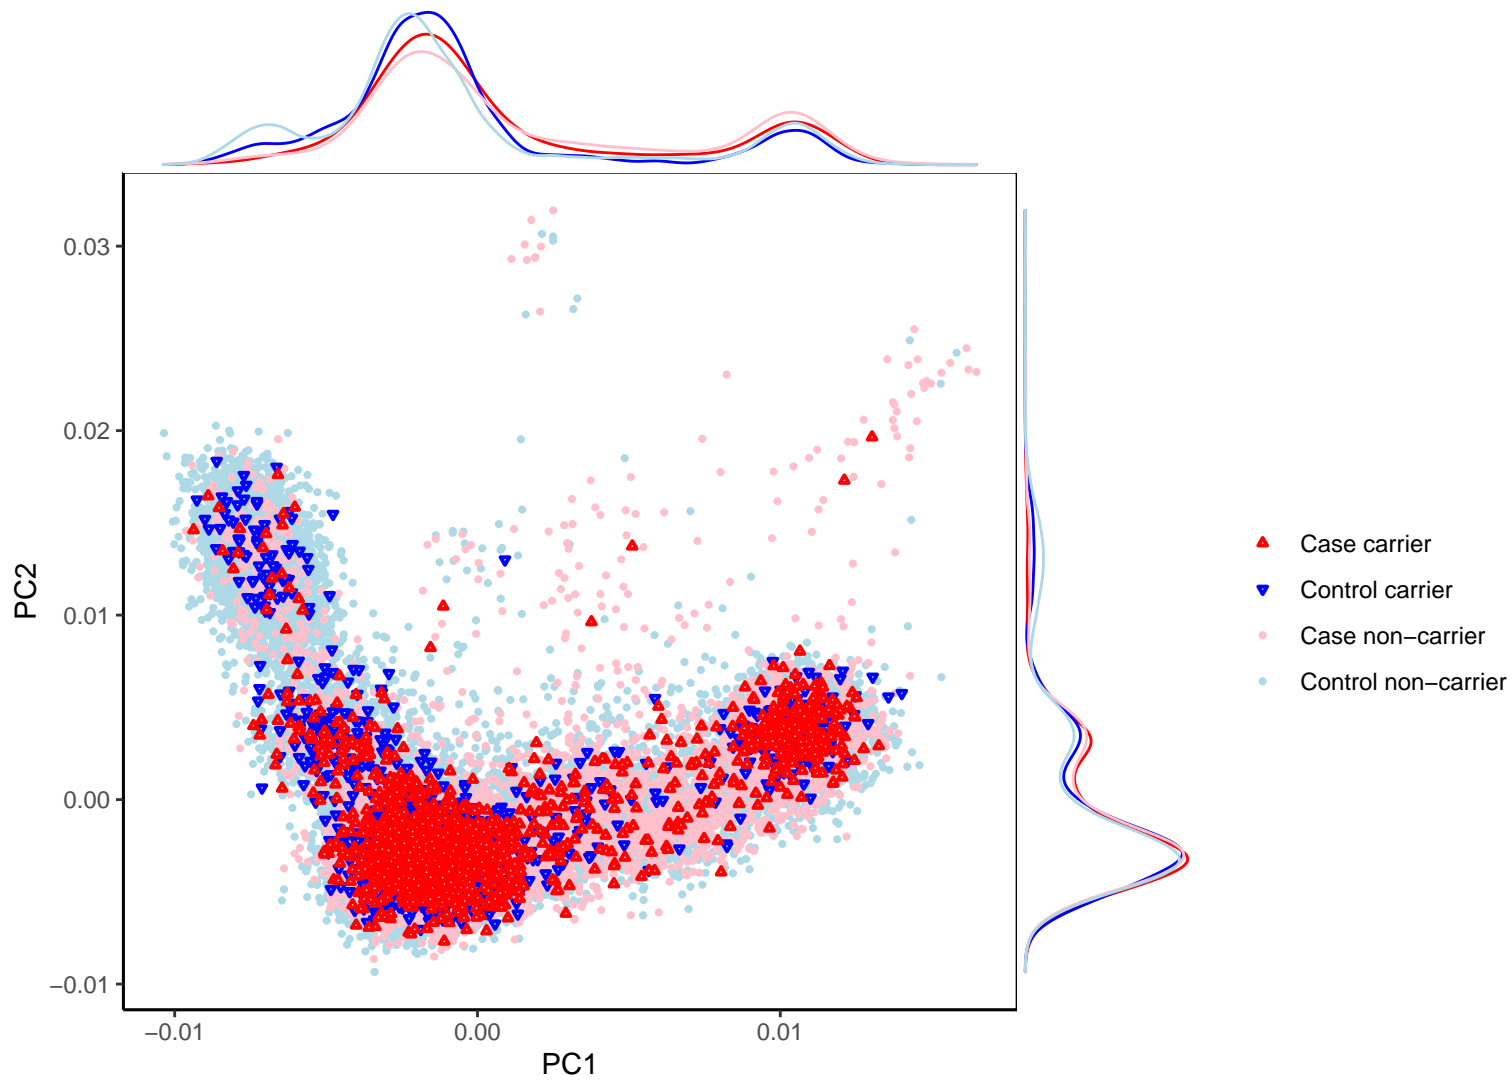

# NEXTERA chr16.50793607\_C\_T

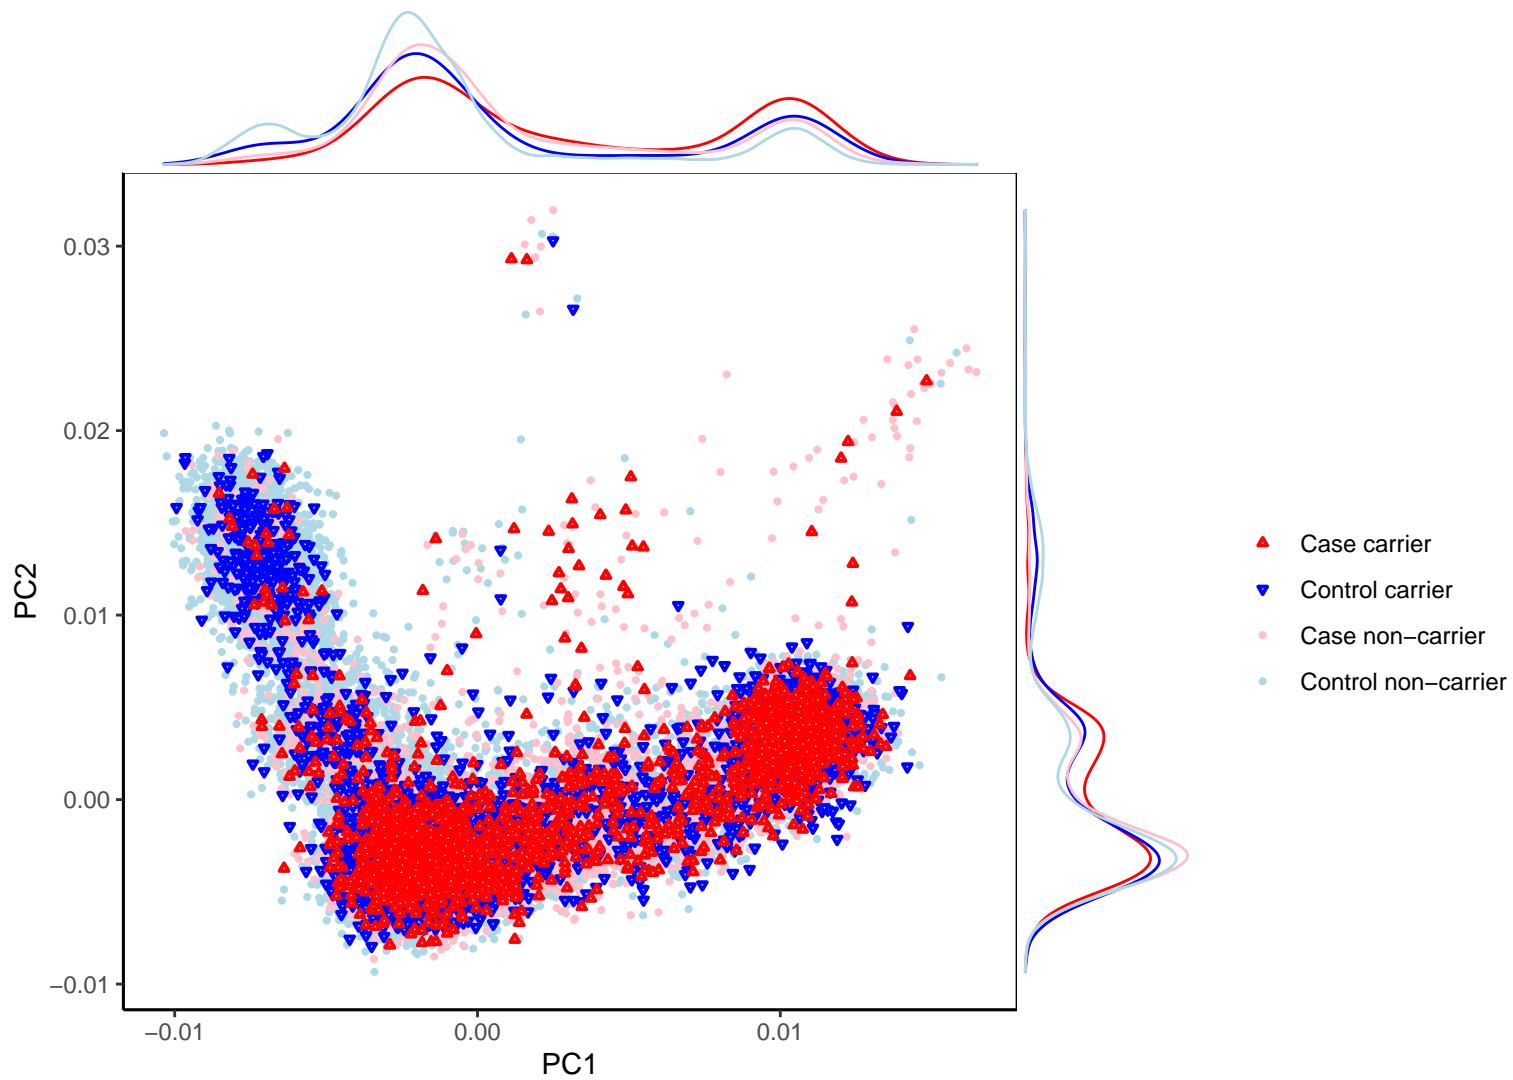

# NEXTERA chr17.40558934\_T\_C

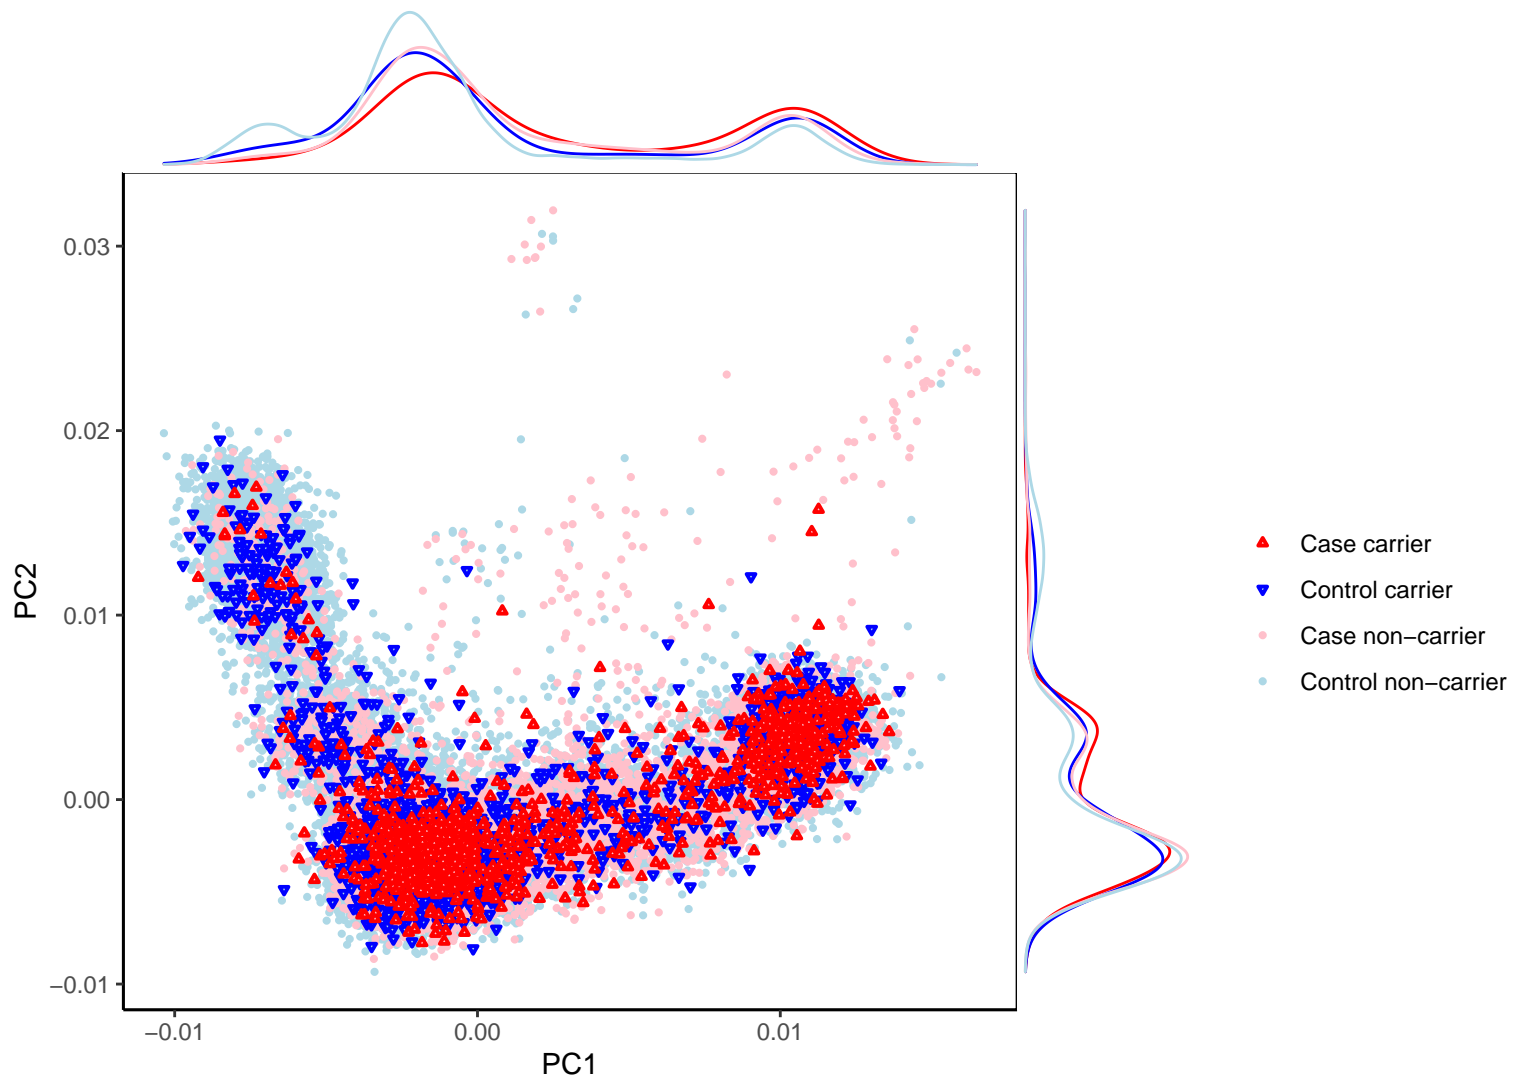

# NEXTERA chr19.10352442\_G\_C

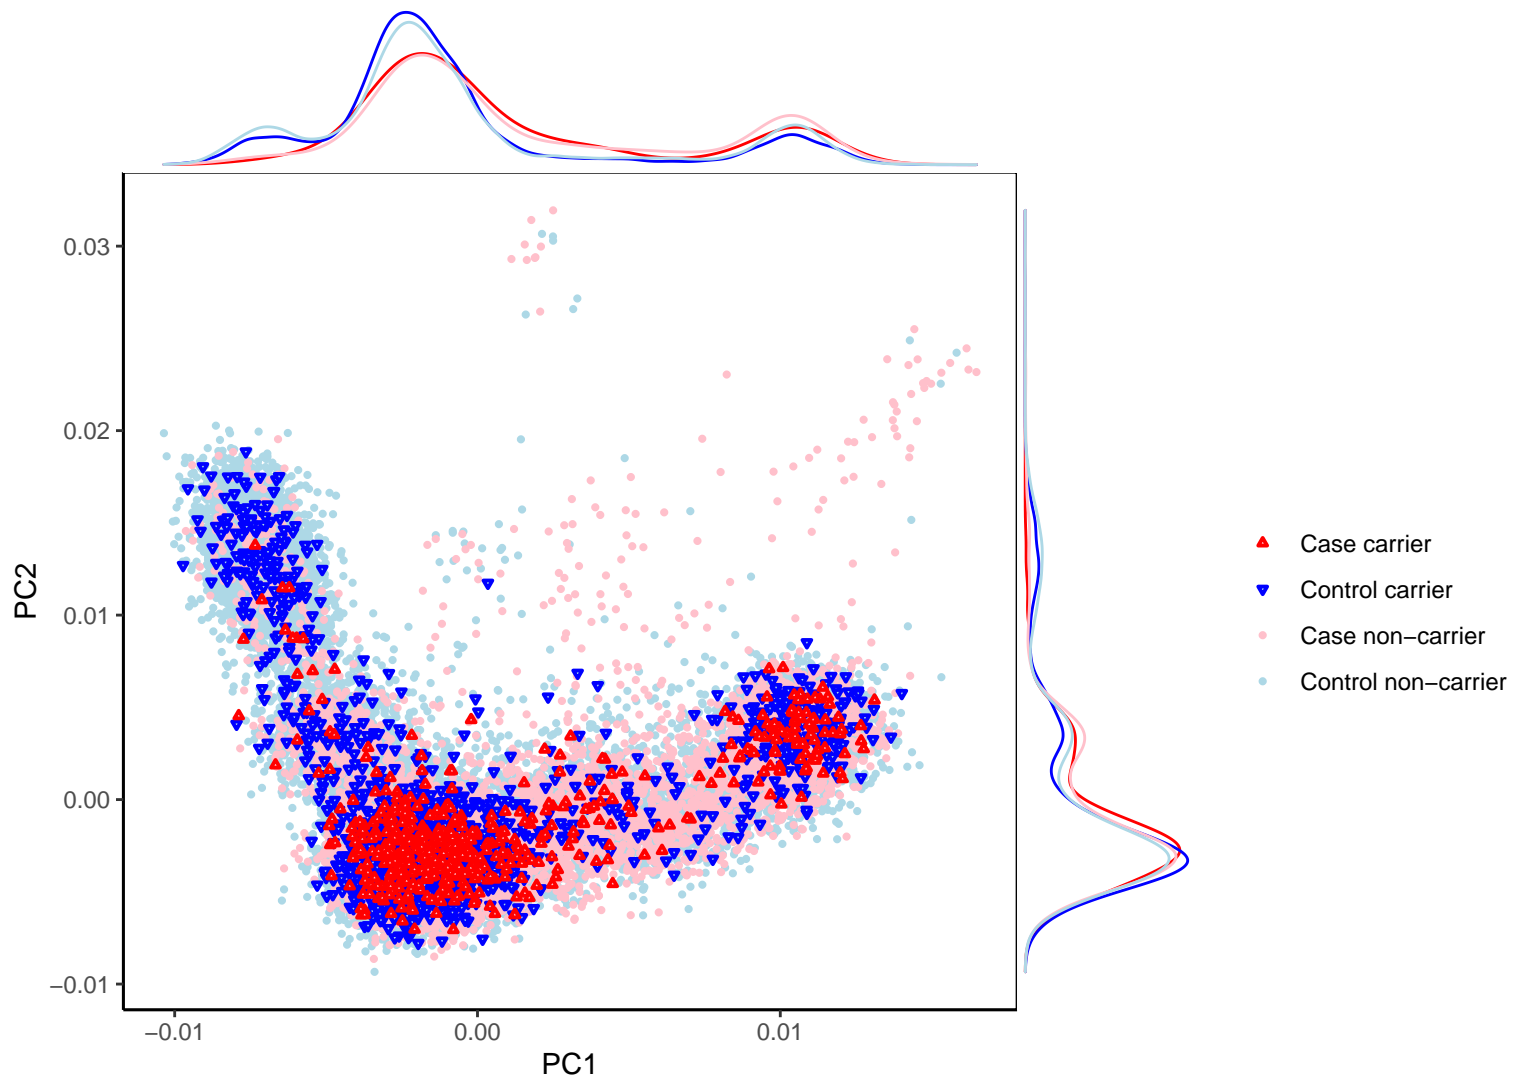

# NEXTERA chr19.10354167\_G\_A

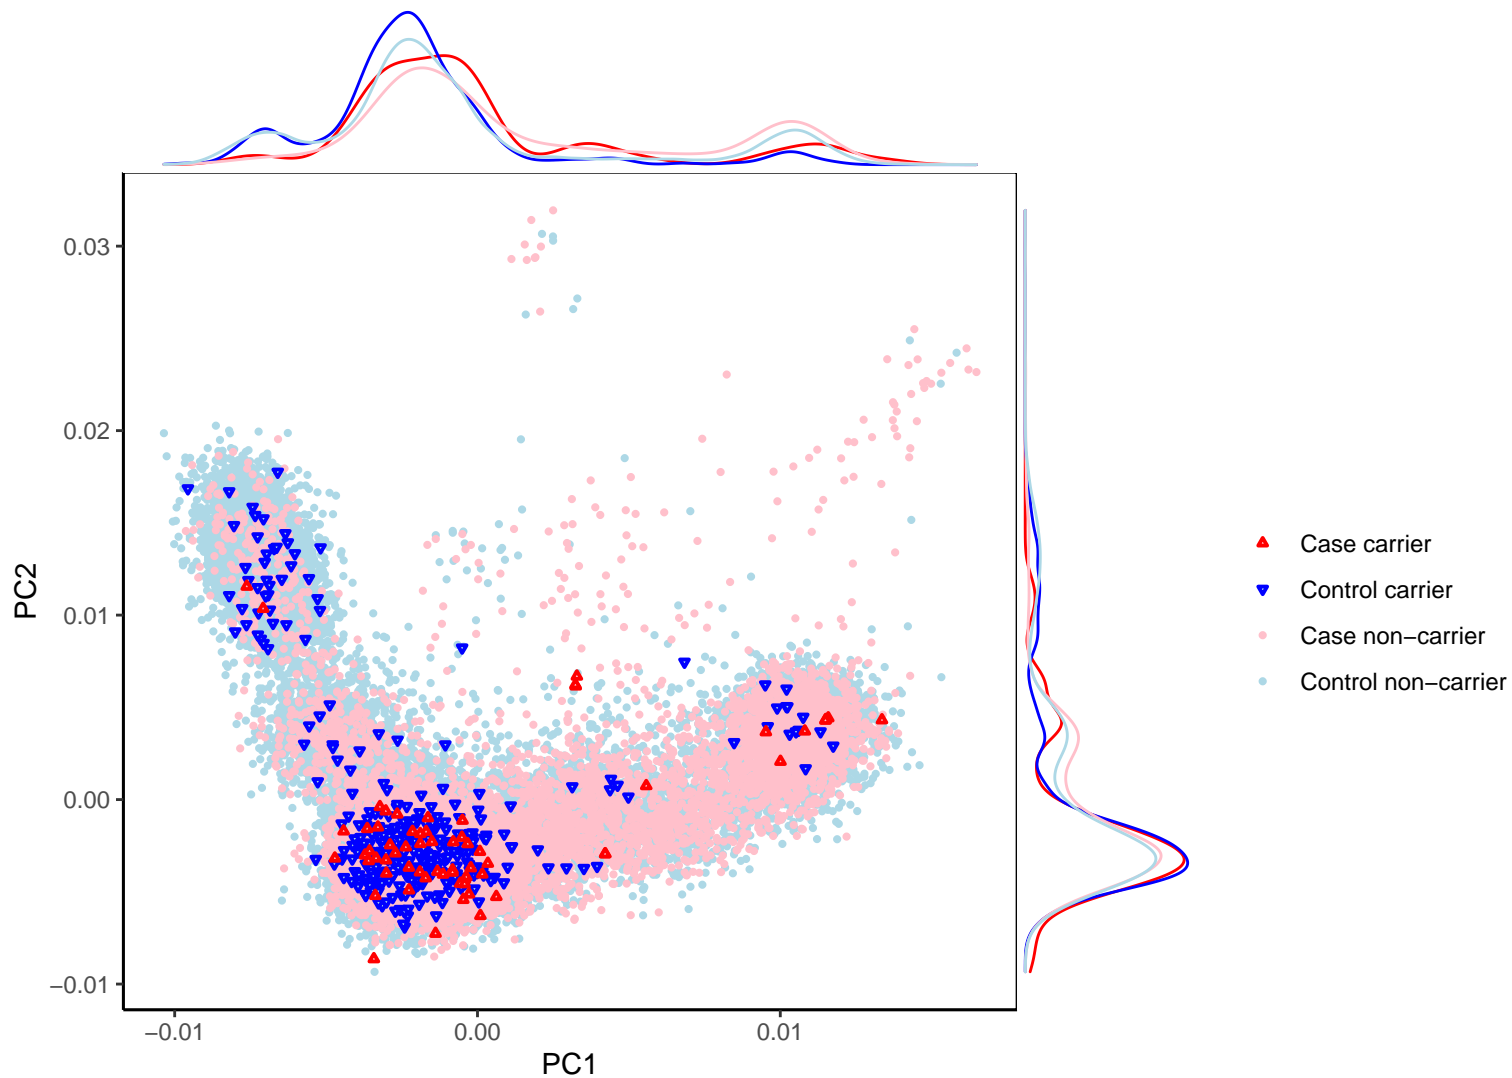

# NEXTERA chr1.28150681\_T\_C

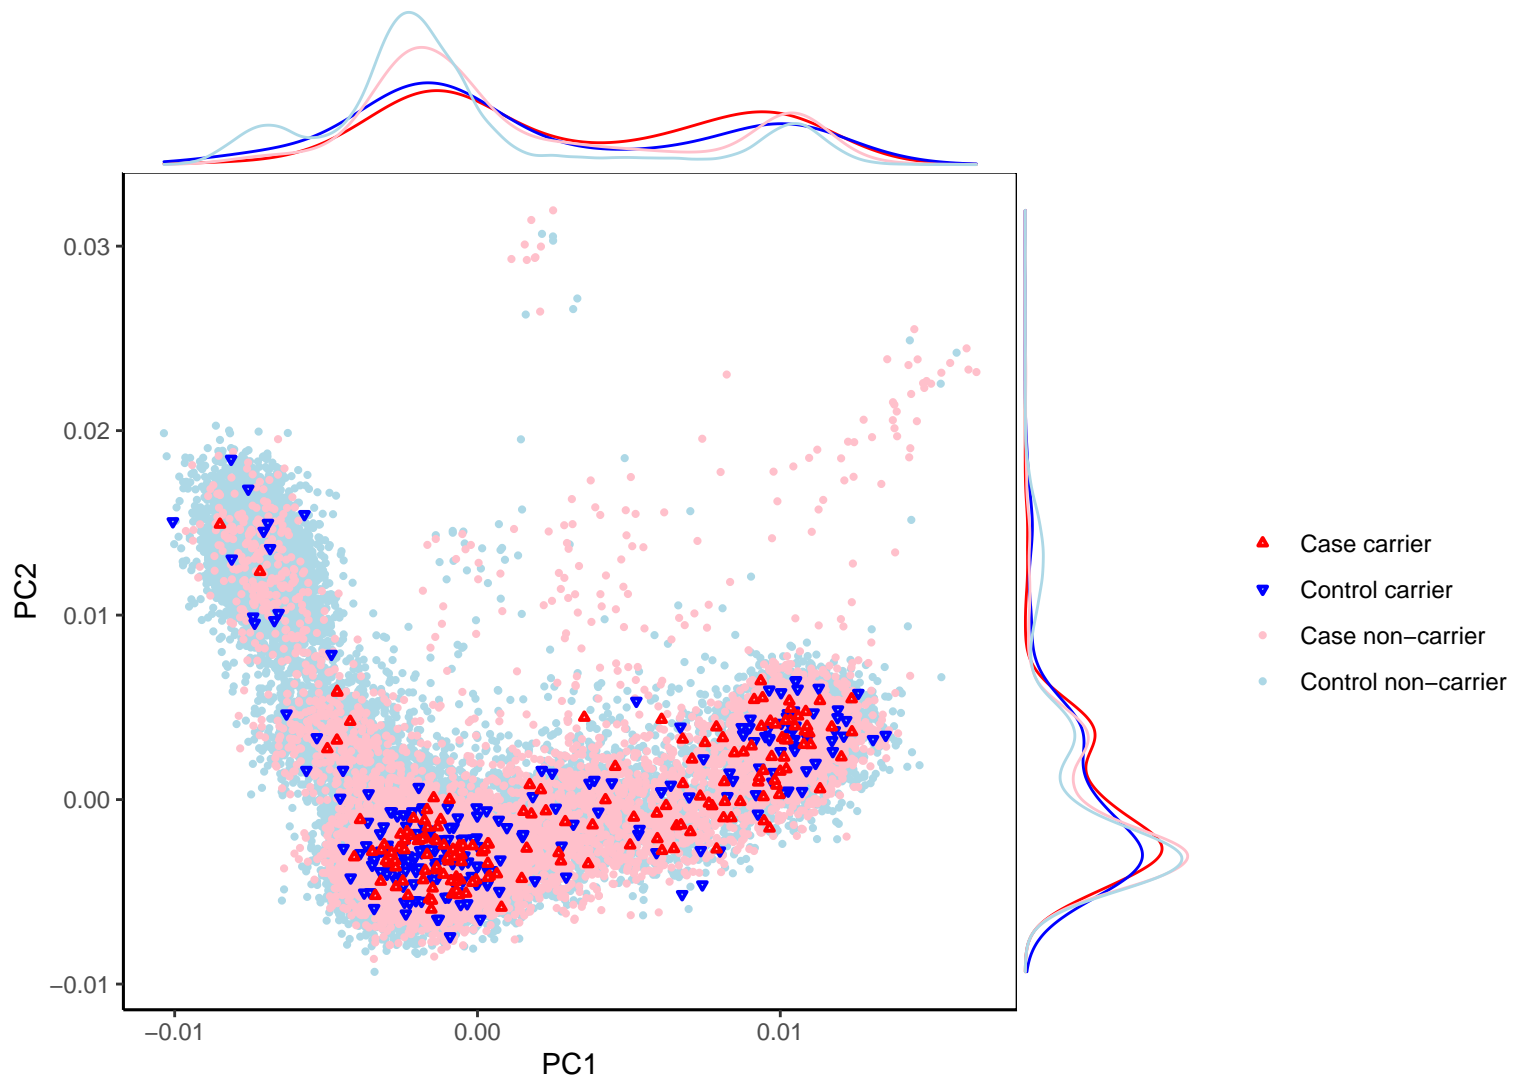



# NEXTERA chr1.67206980\_T\_C

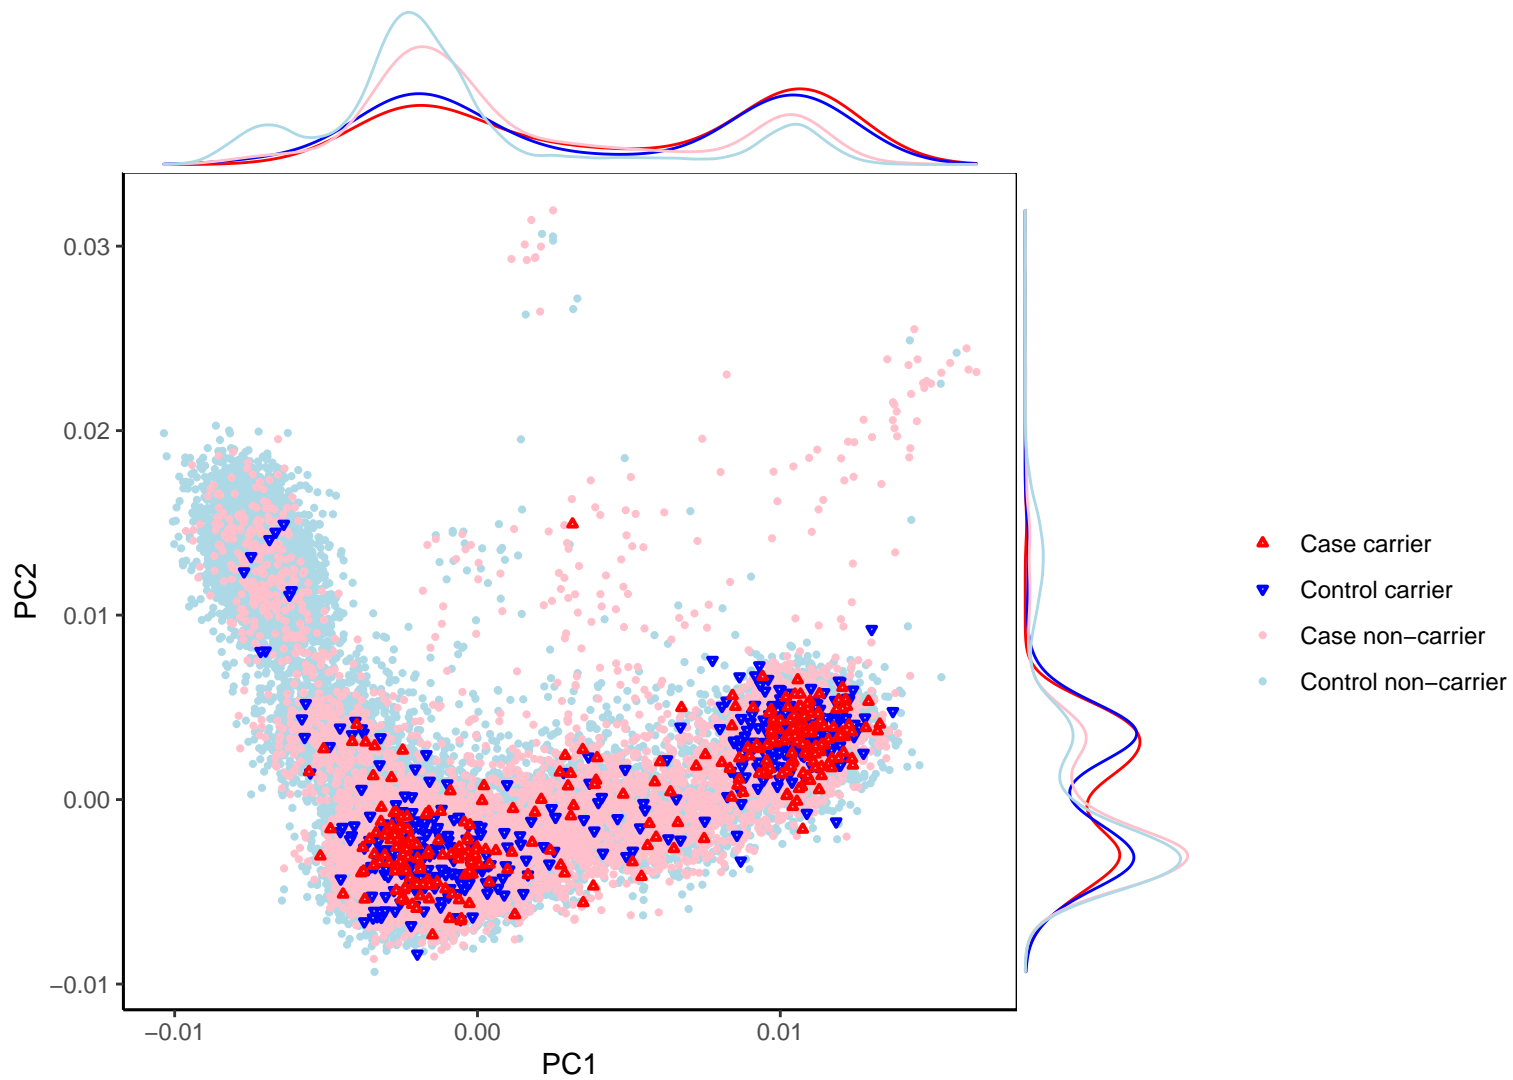

# NEXTERA chr1.67240217\_G\_A

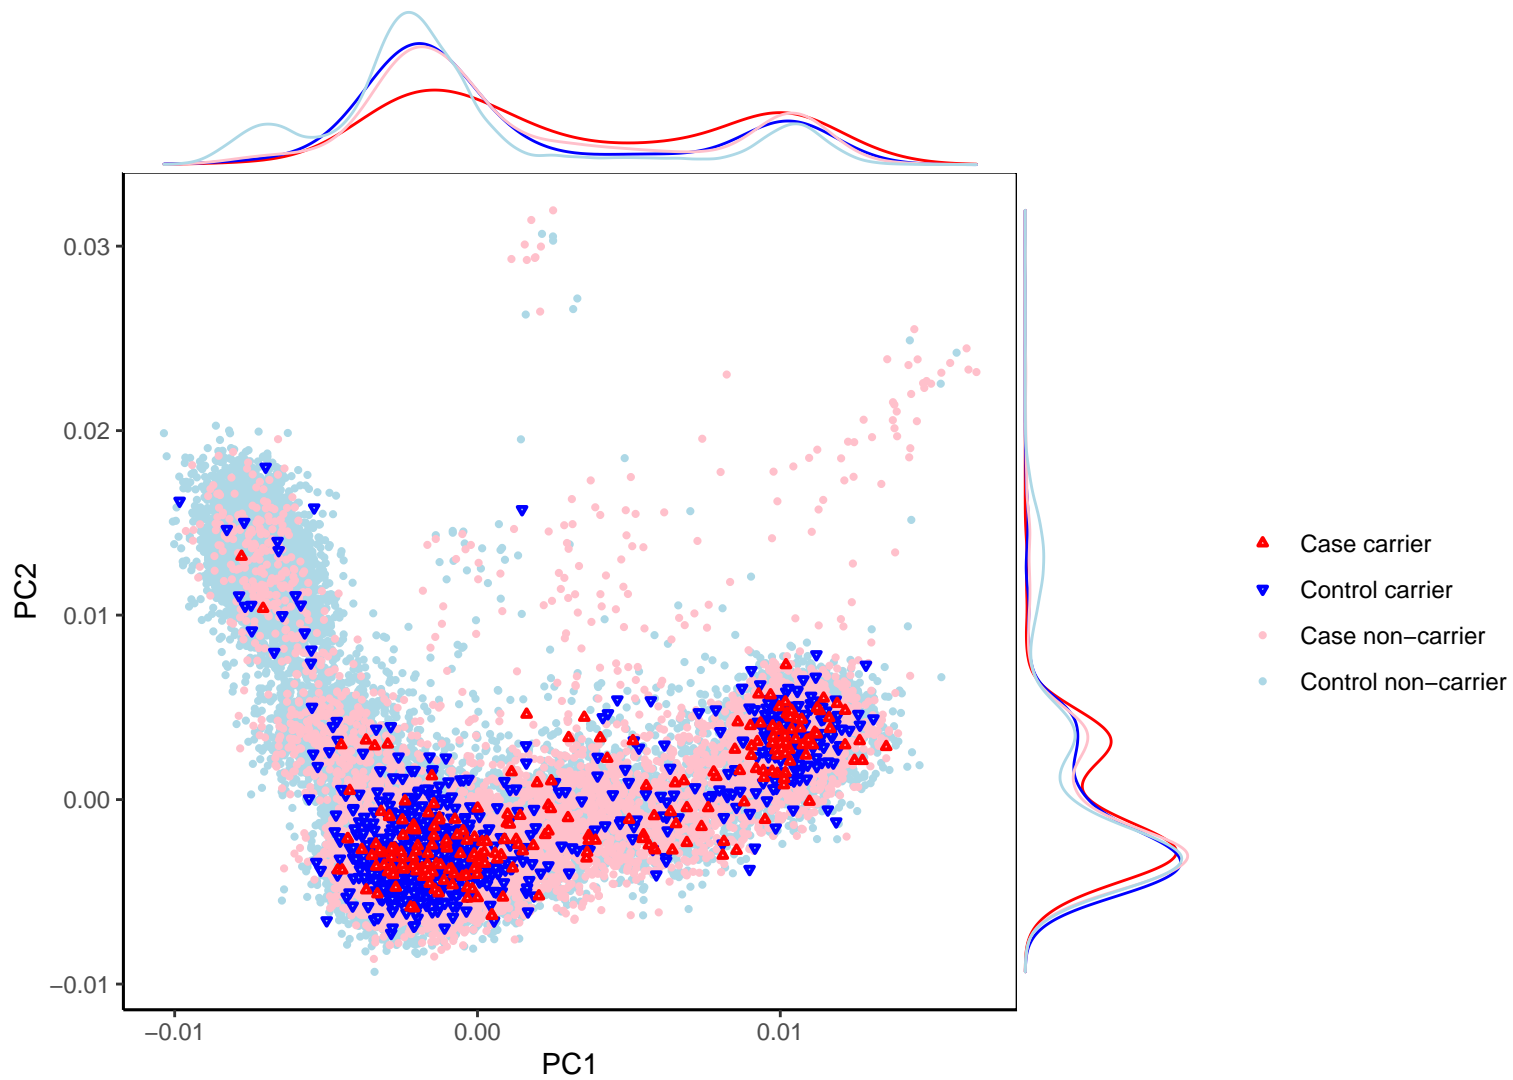

# NEXTERA chr1.67240275\_G\_A

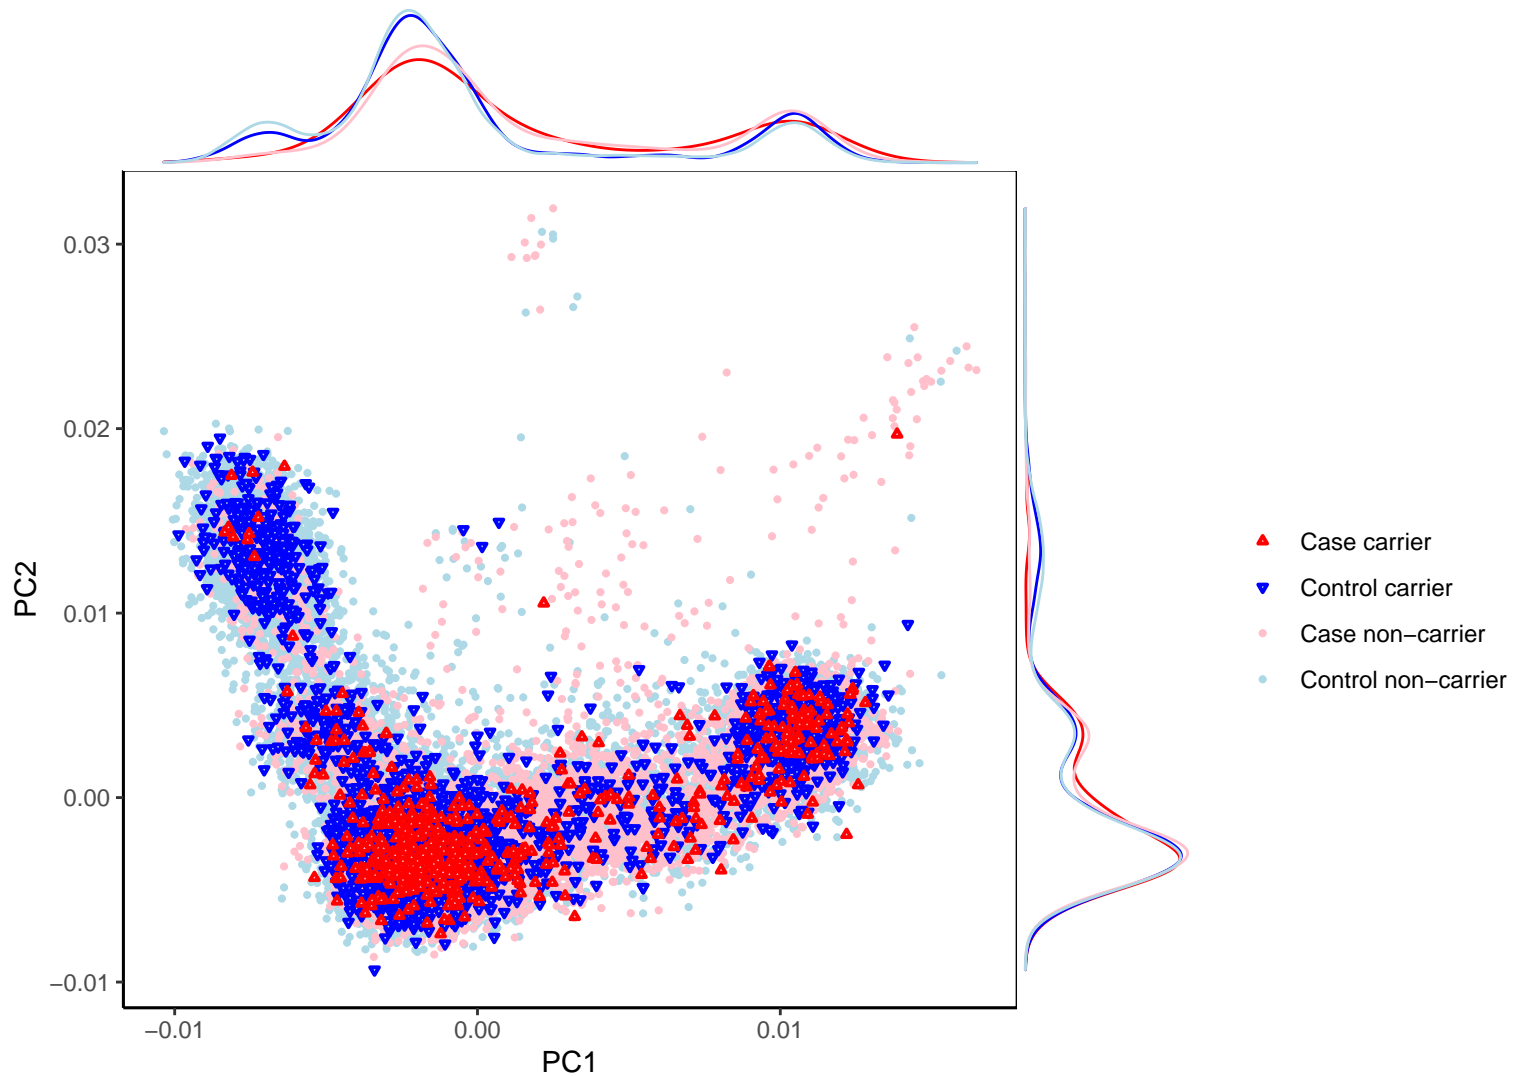

# NEXTERA chr22.21643991\_G\_A

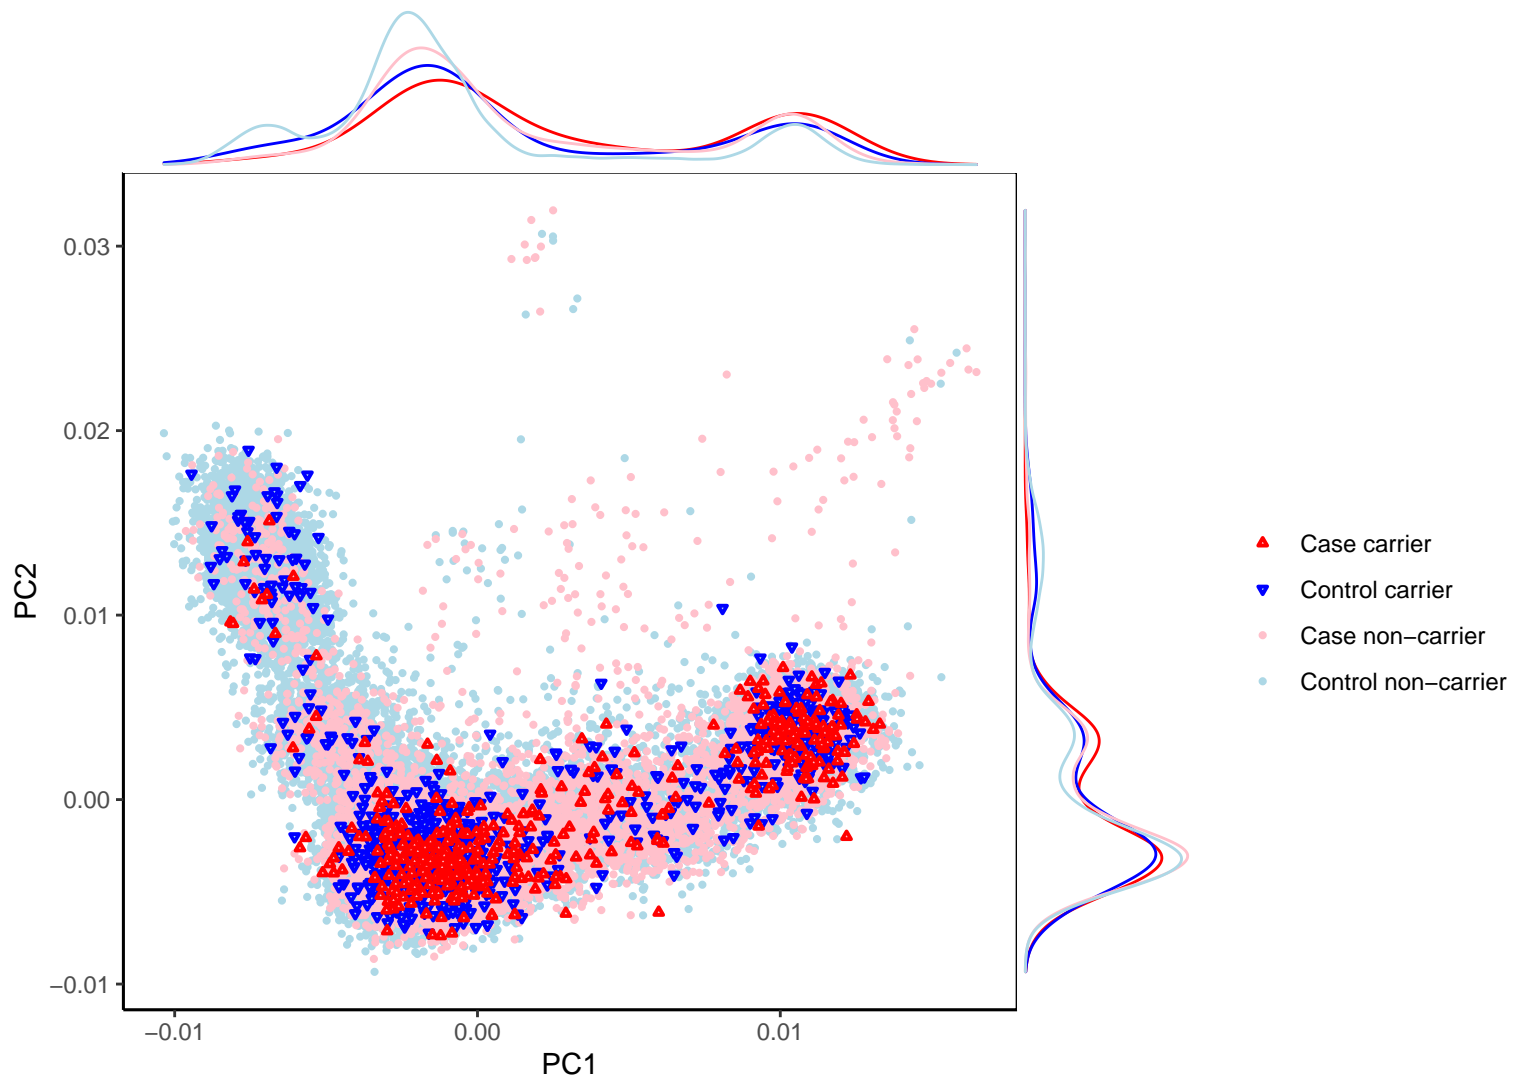

# NEXTERA chr2.233263166\_A\_G

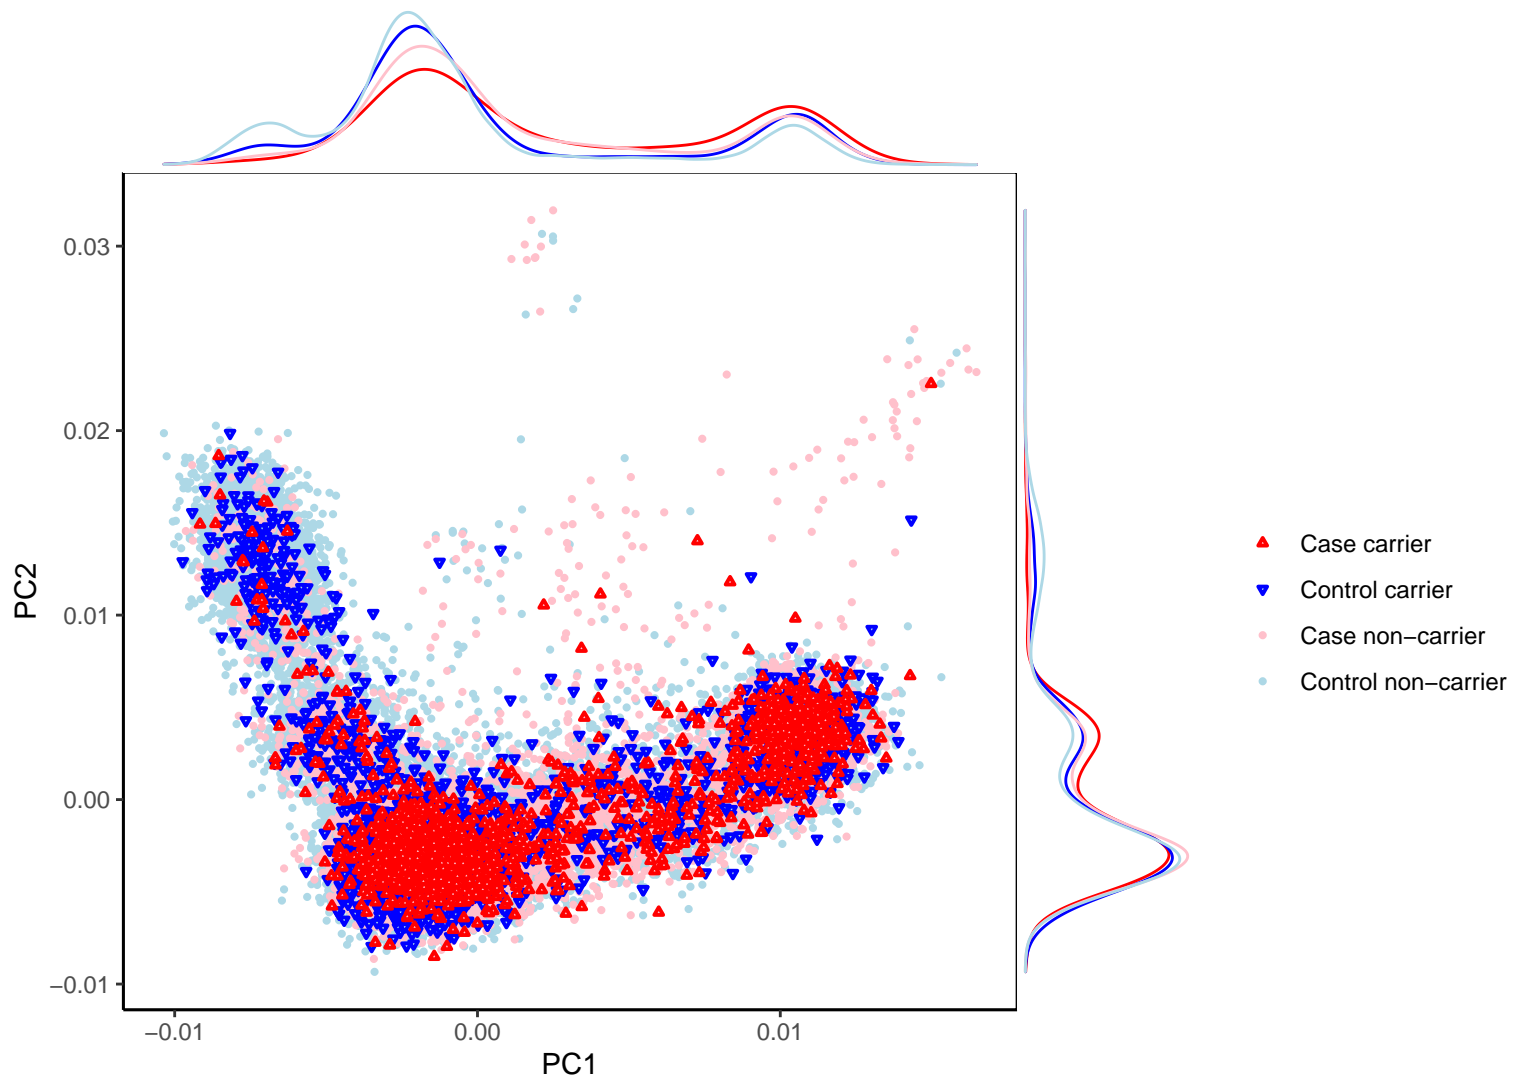

NEXTERA chr2.233320674\_A\_G

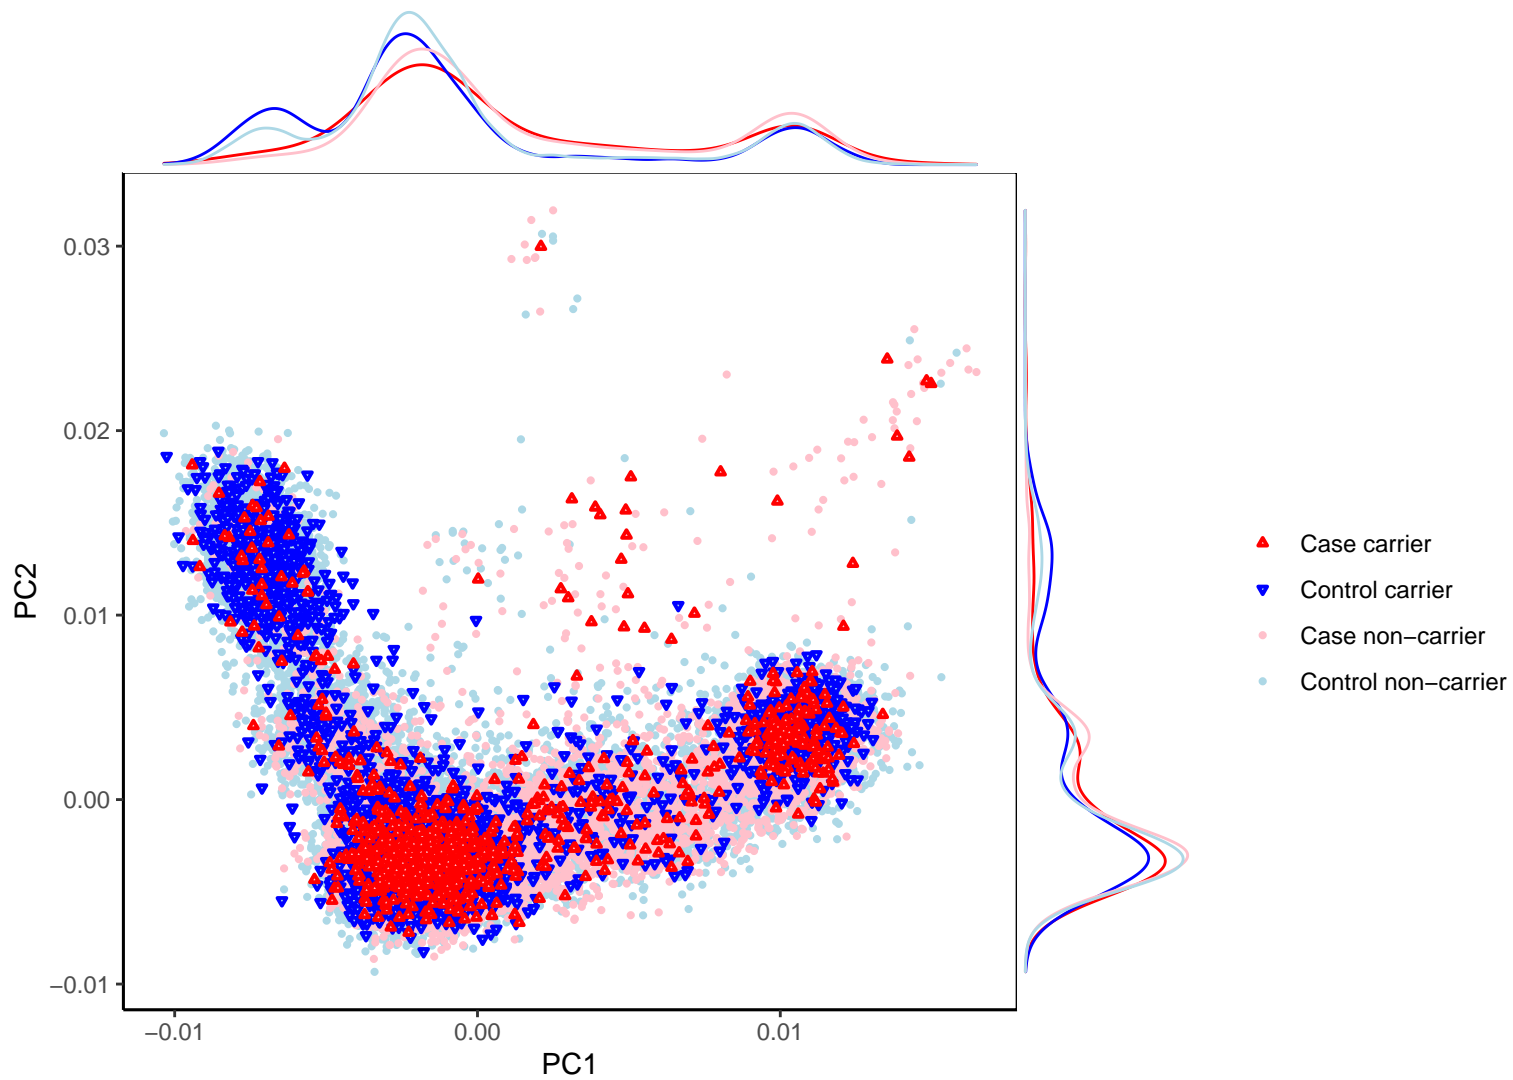

# NEXTERA chr2.233527423\_C\_T

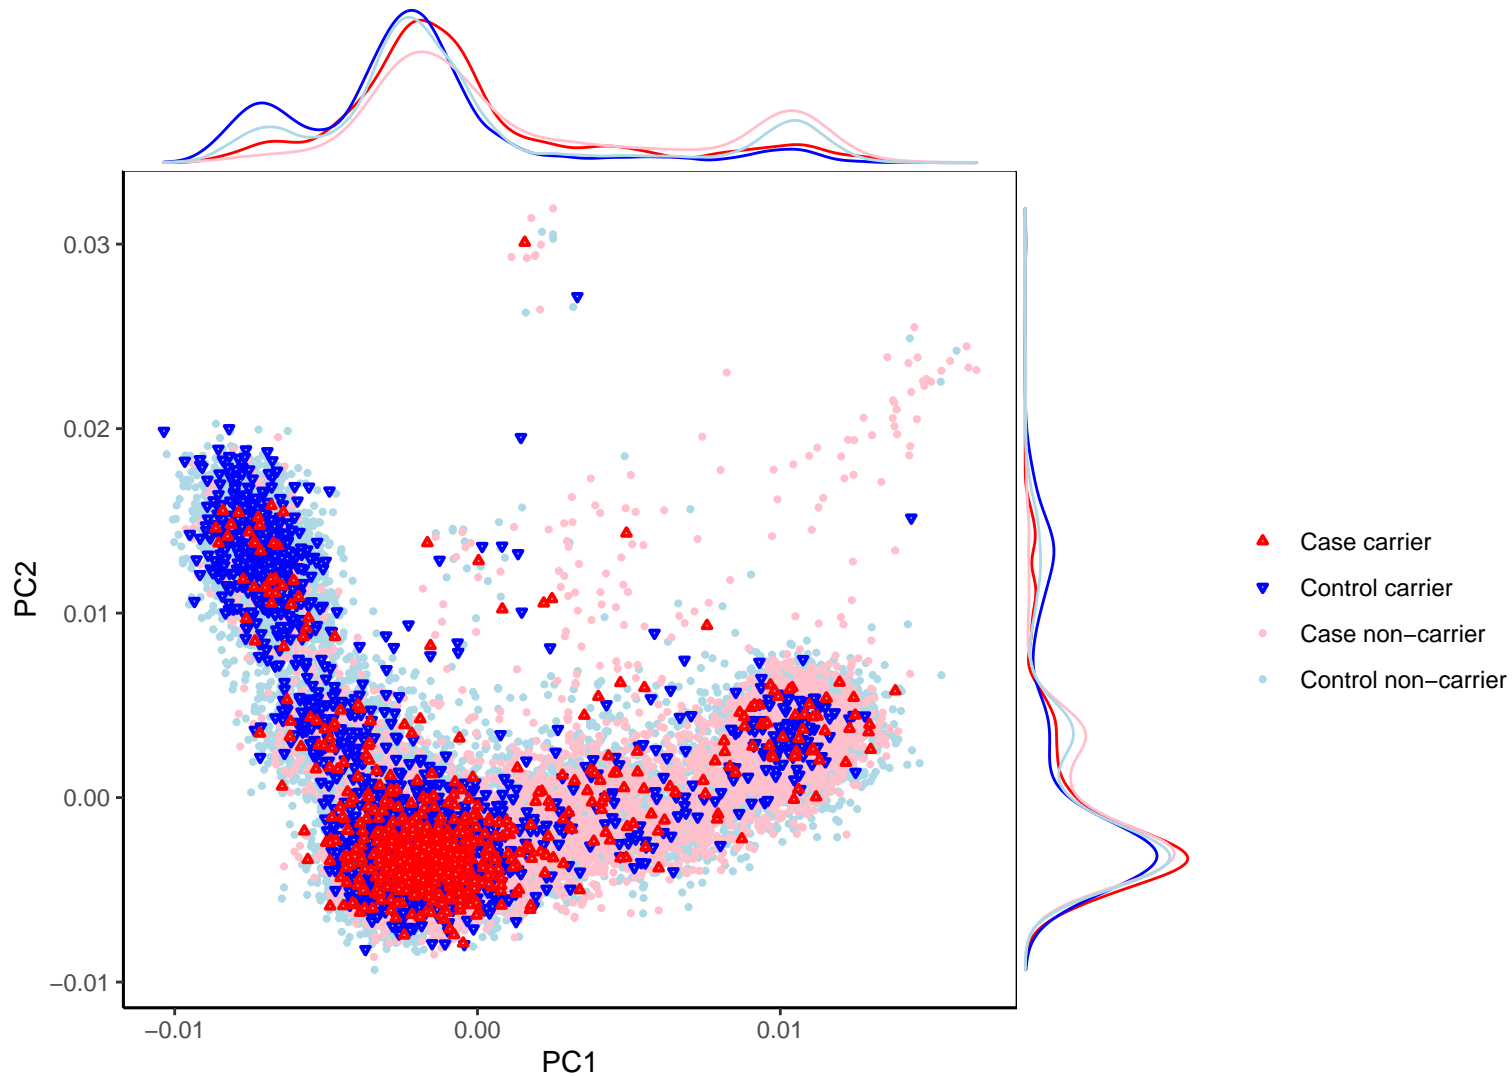

# NEXTERA chr4.102267552\_C\_T

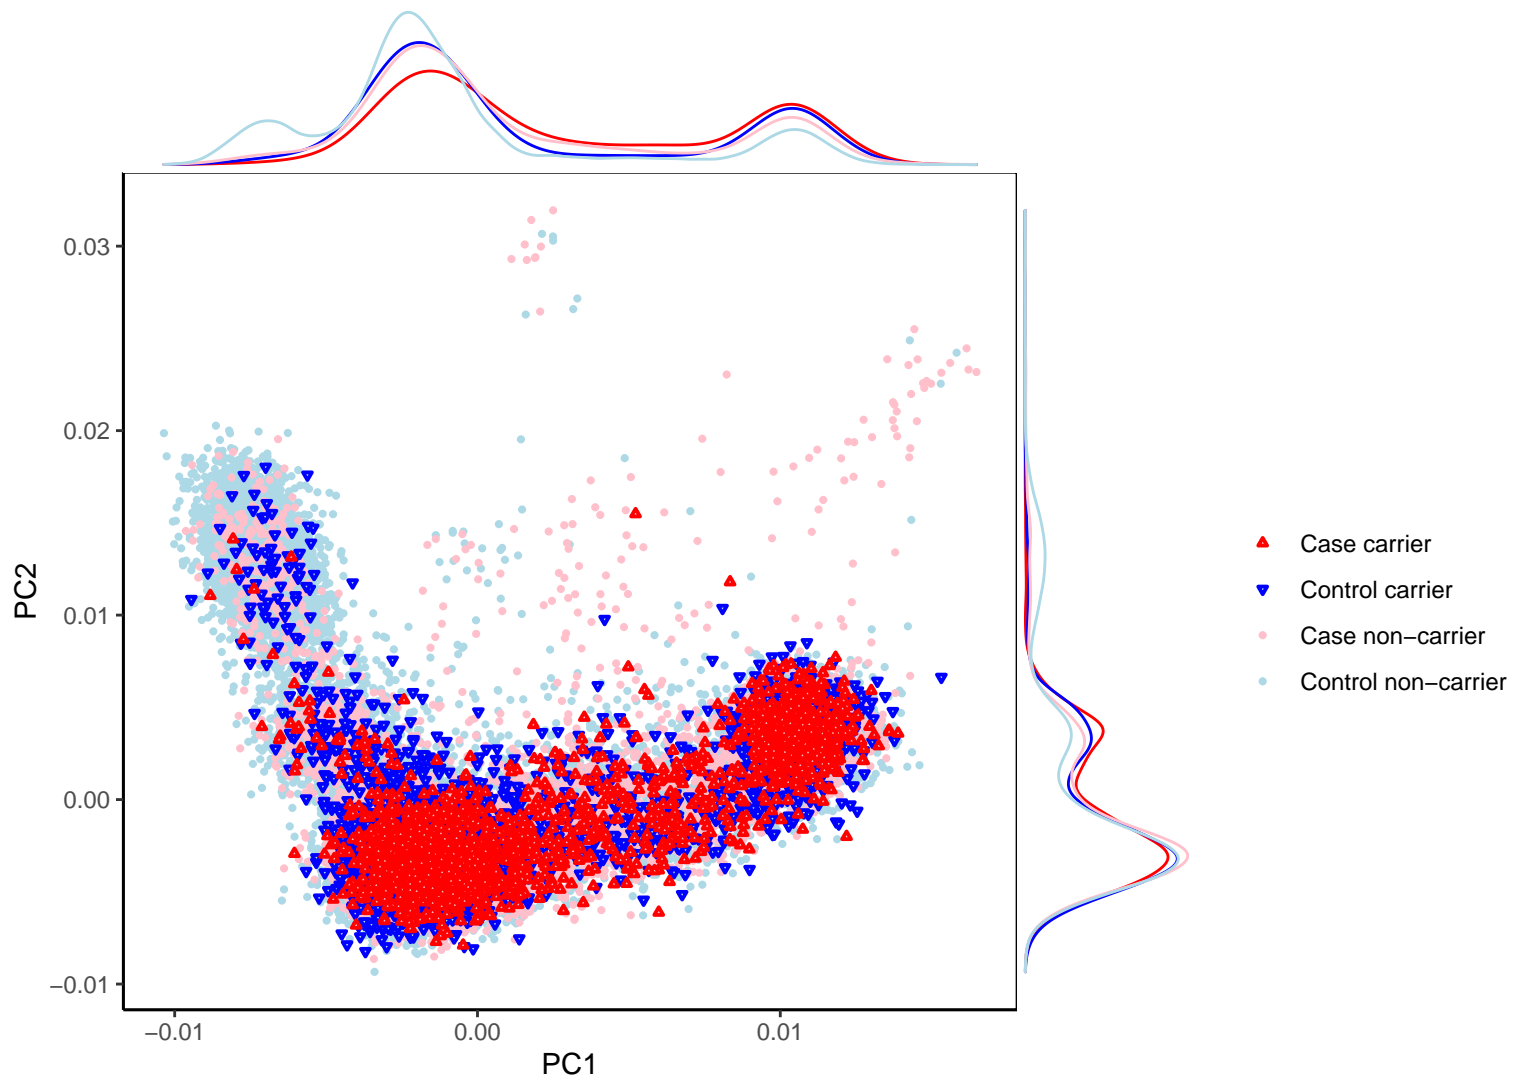



# NEXTERA chr4.3447925\_G\_A

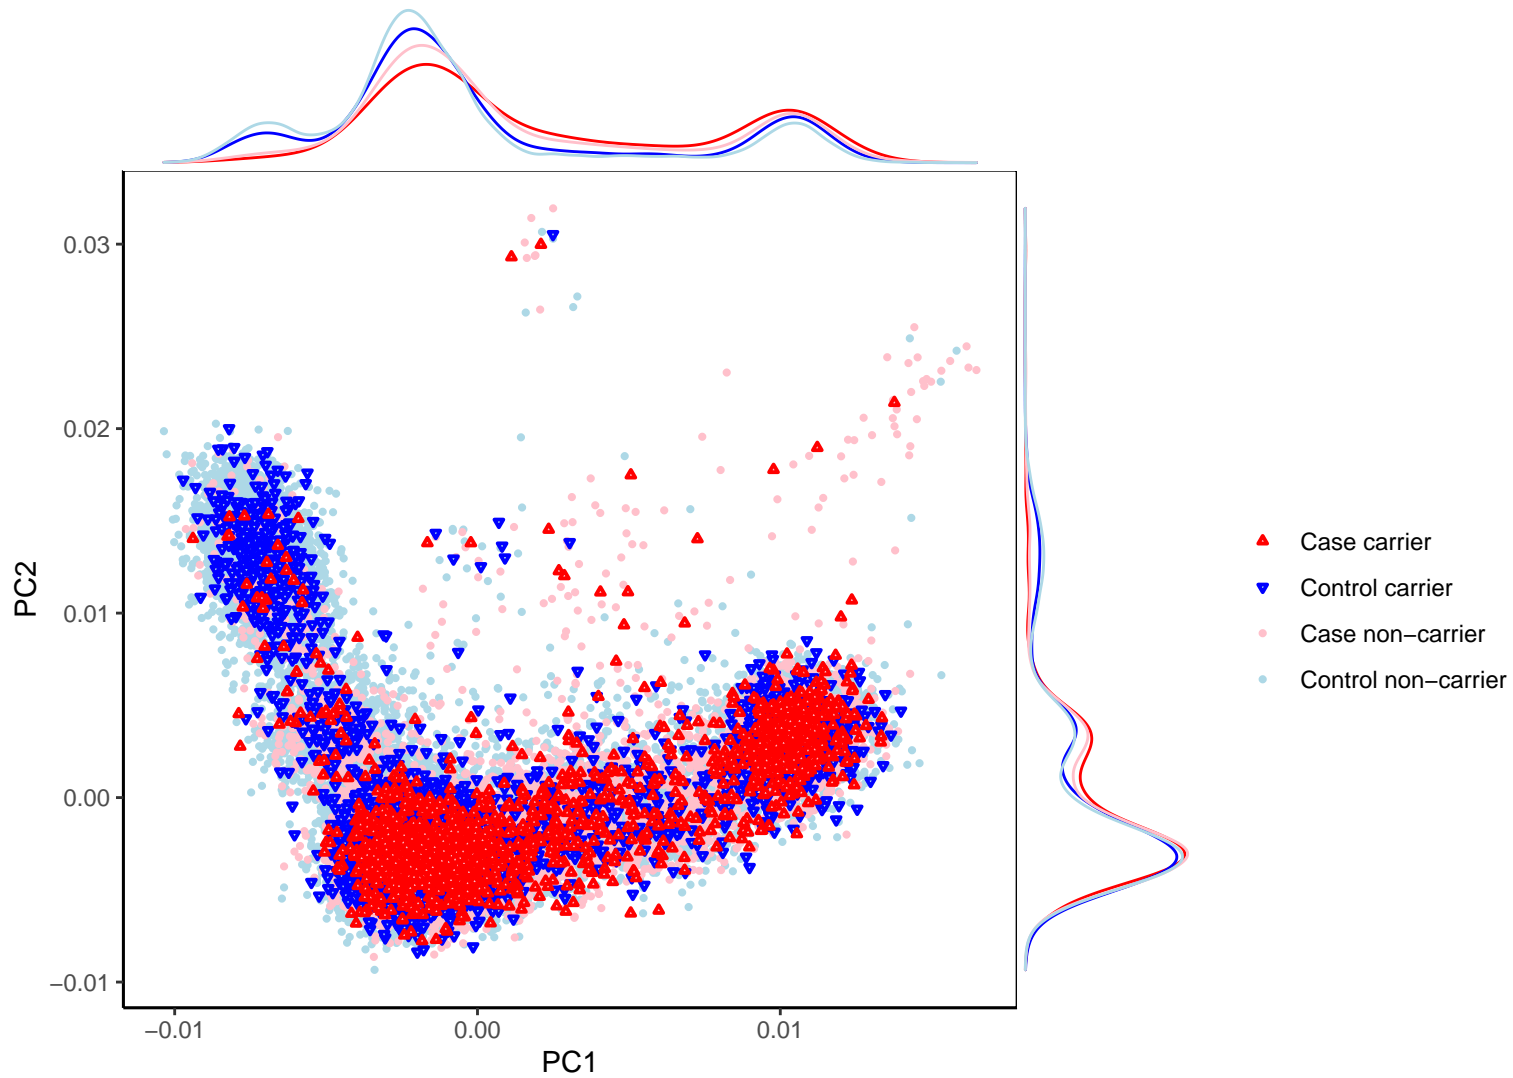

# NEXTERA chr4.94573345\_C\_T

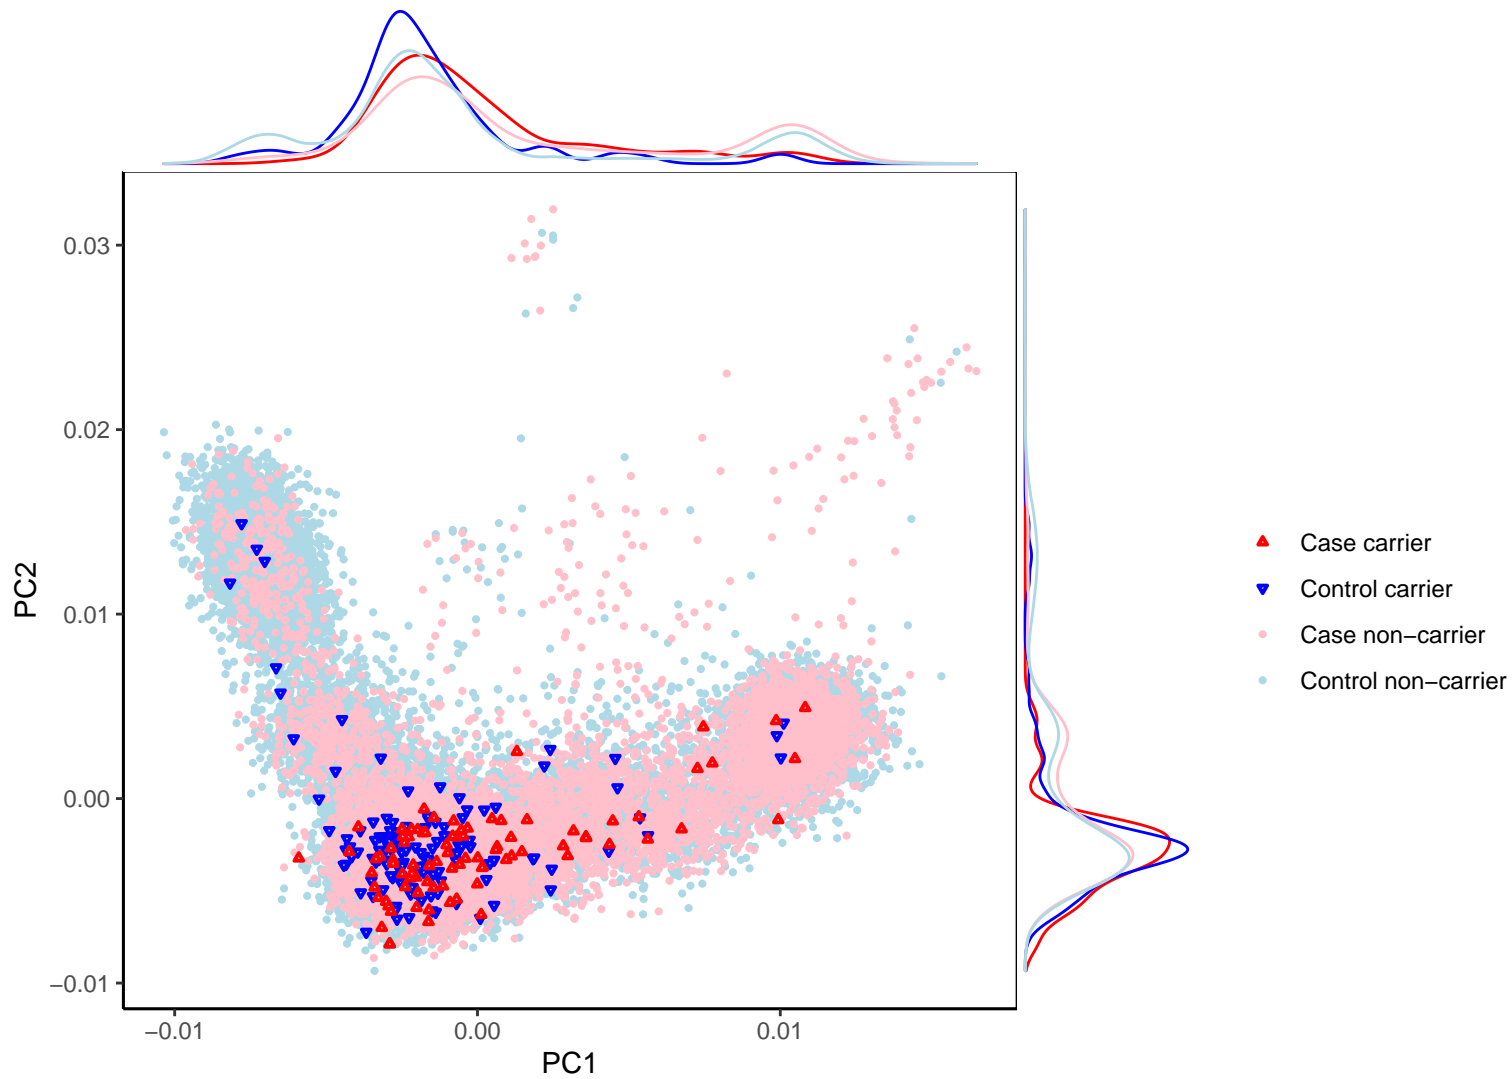

# NEXTERA chr5.150848436\_C\_T

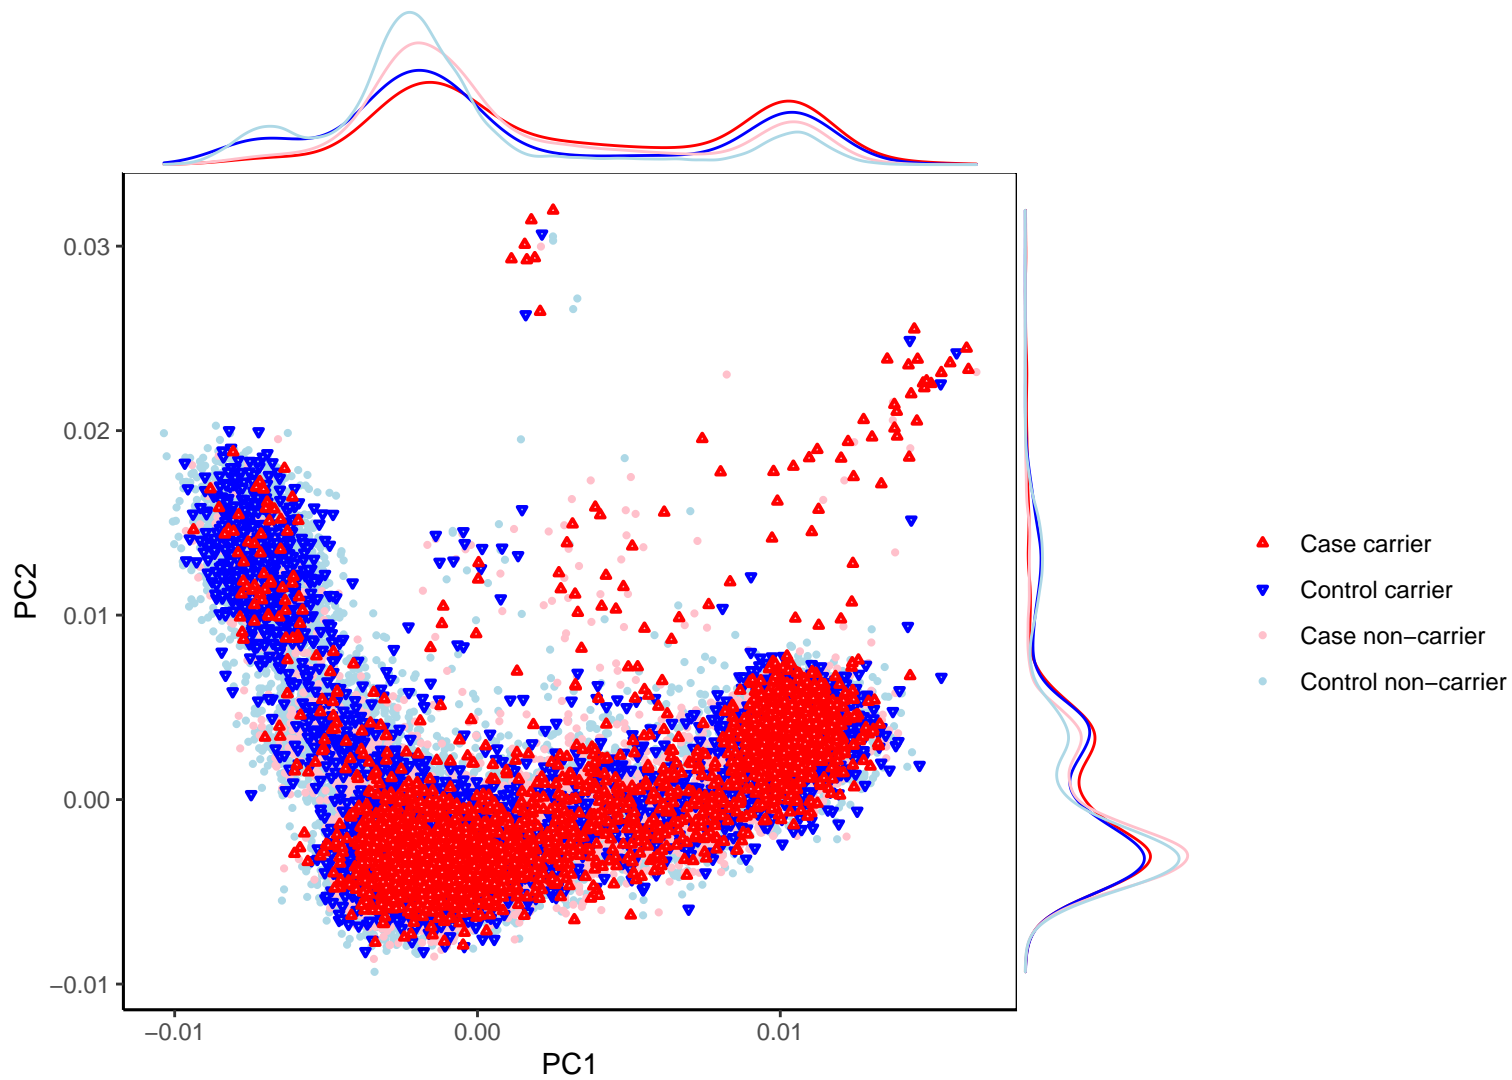

# NEXTERA chr5.40681152\_C\_T

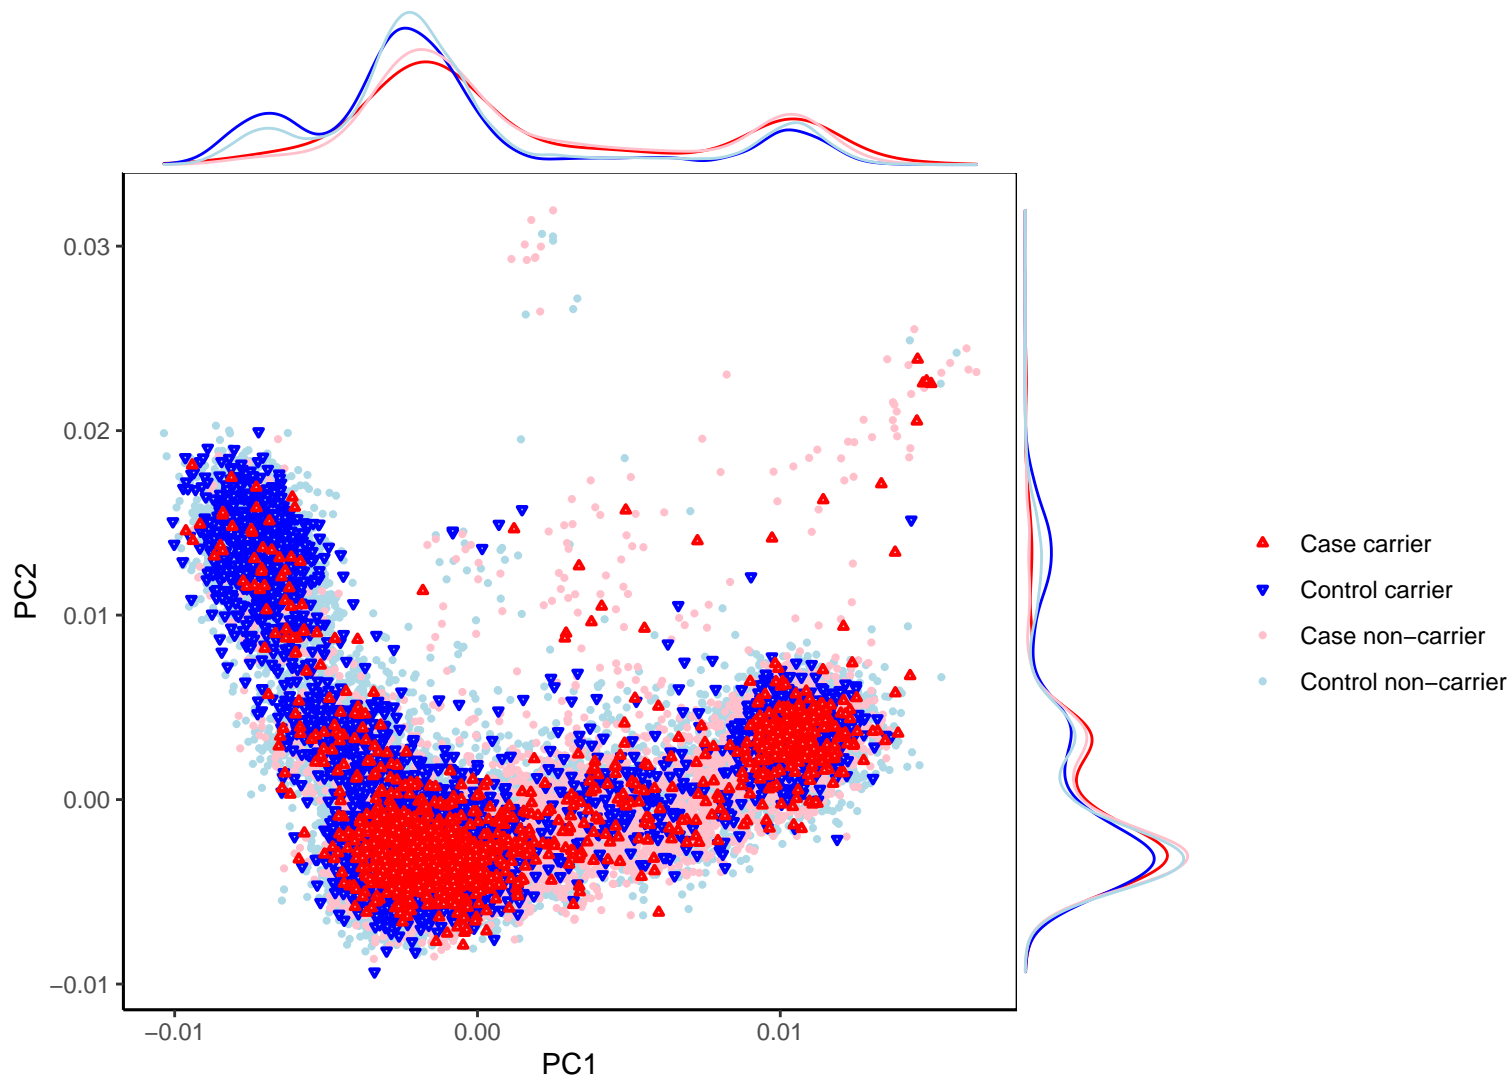

NEXTERA chr6.159041392\_C\_T

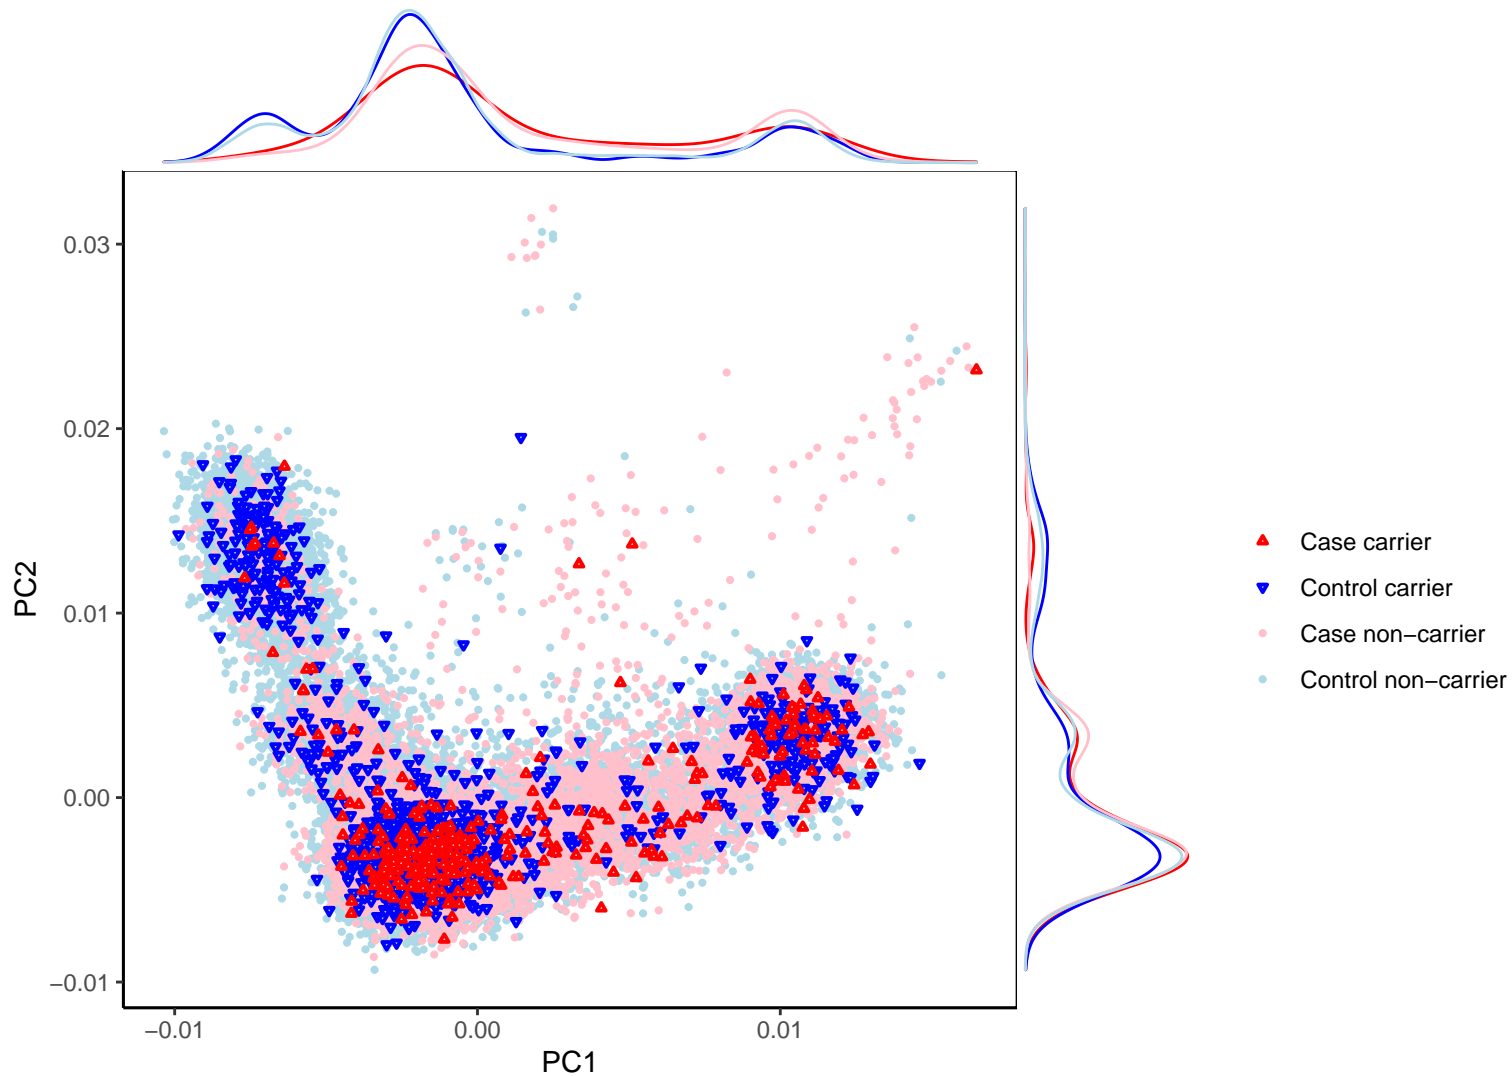

# NEXTERA chr8.21909729\_G\_A

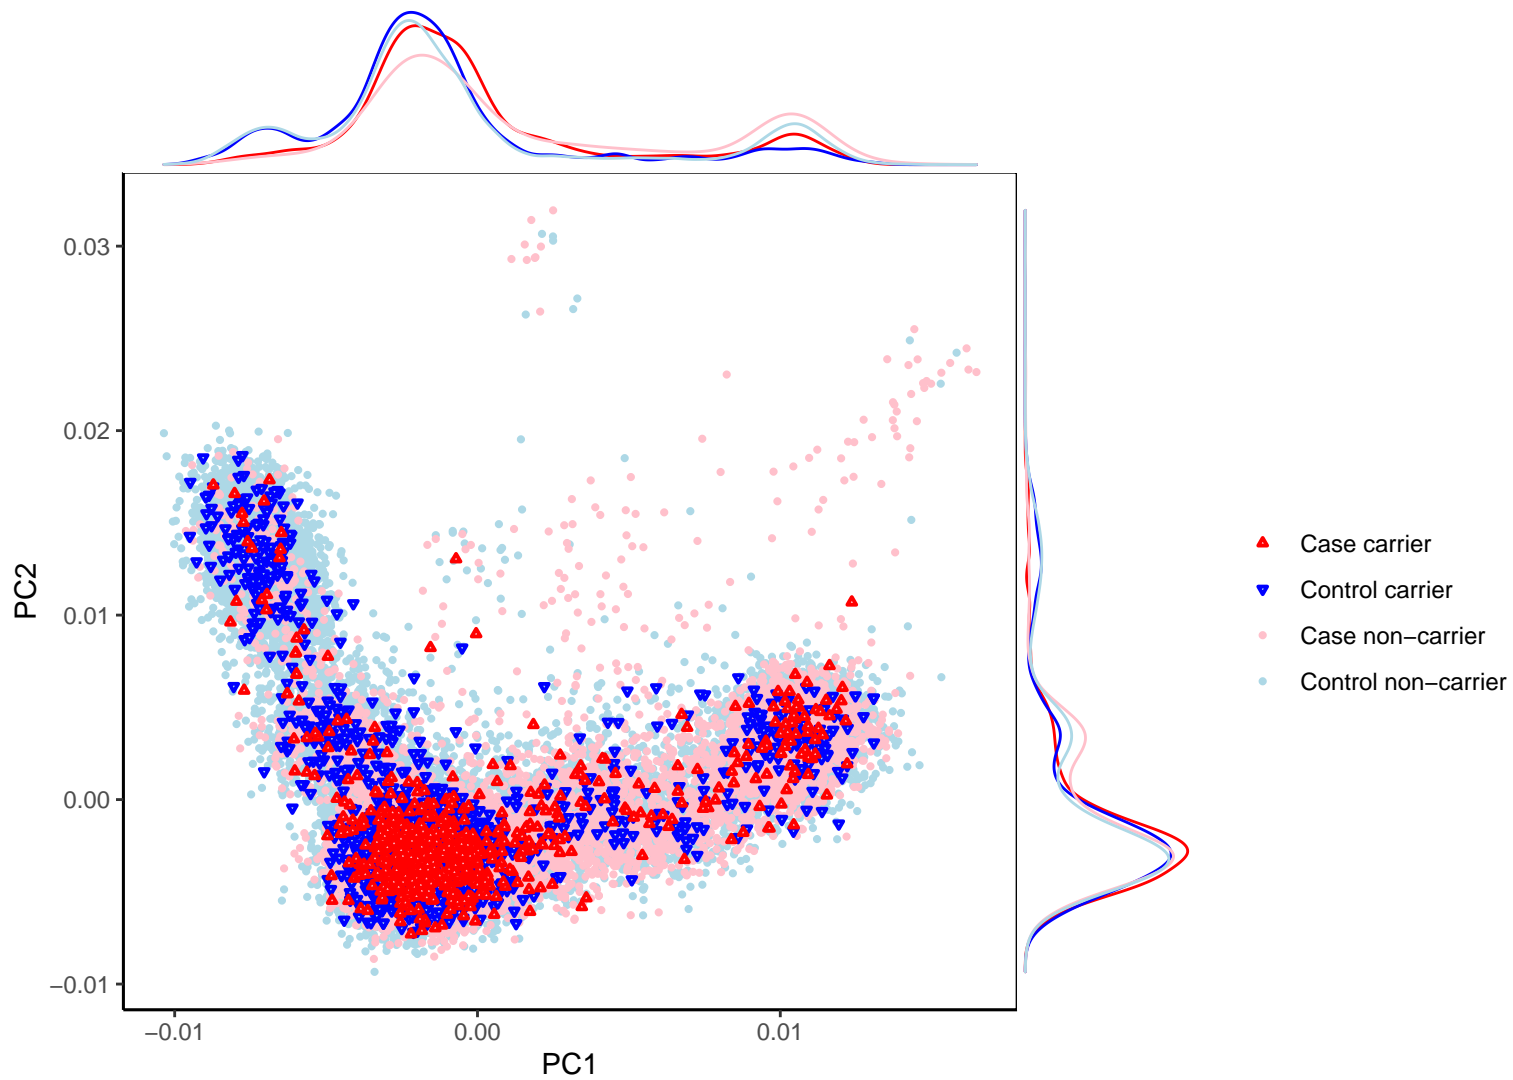

# NEXTERA chr9.136365140\_C\_G

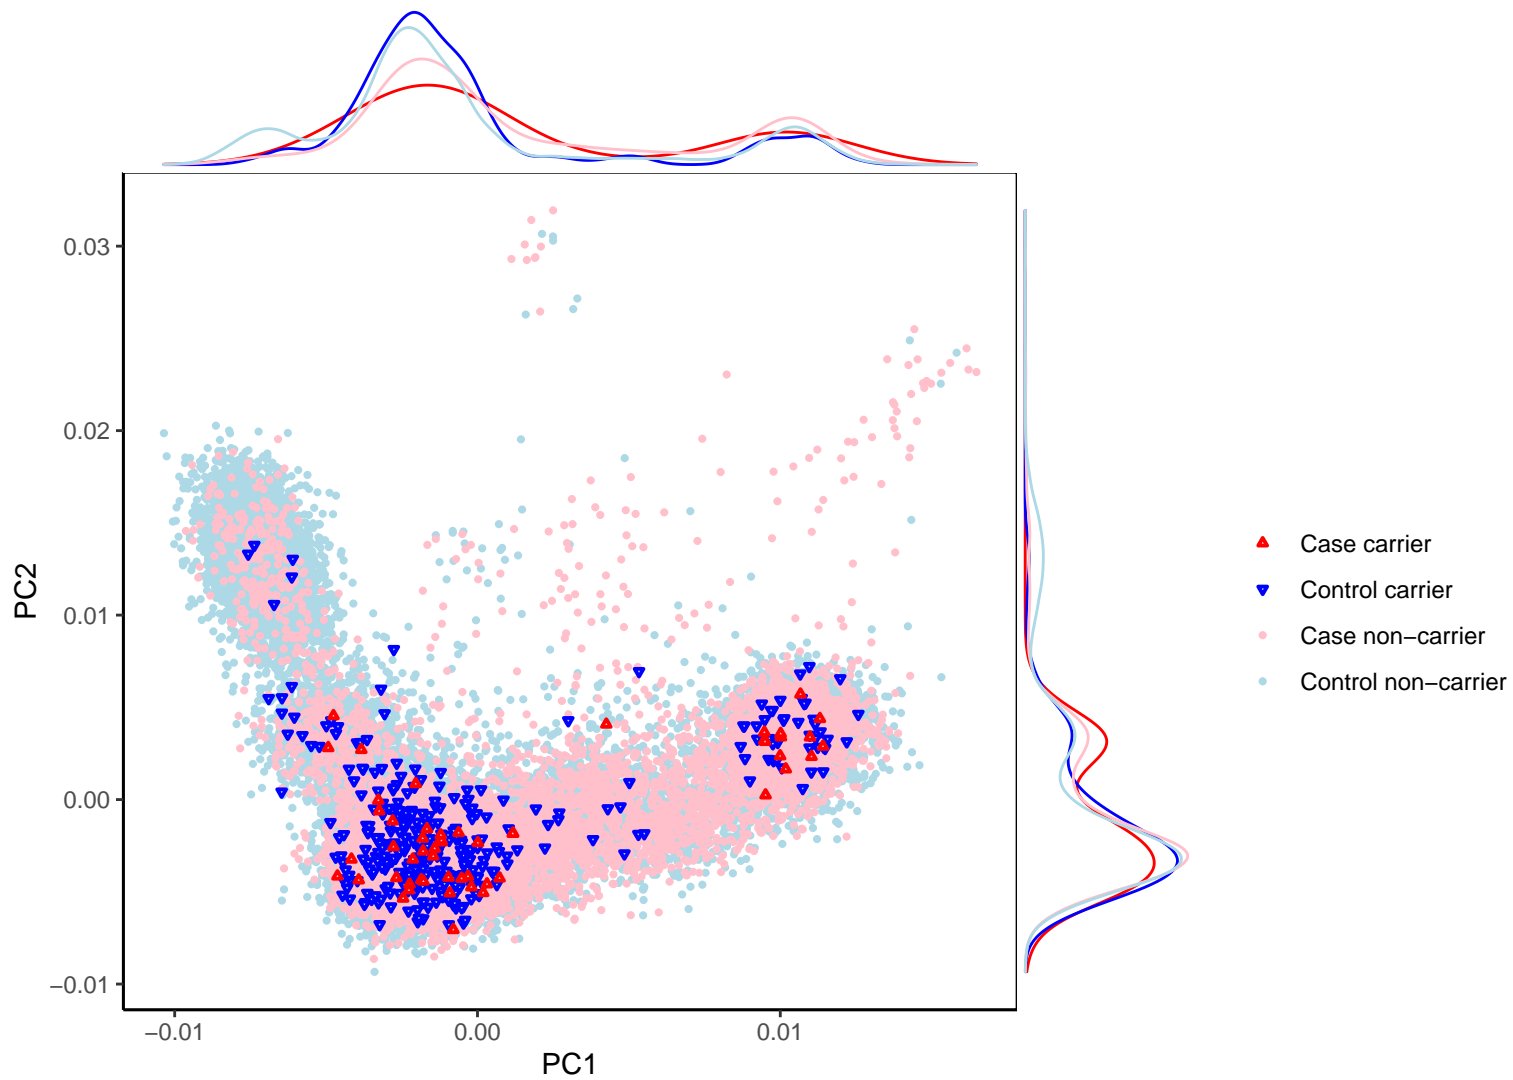

# NEXTERA chr9.136381955\_C\_T

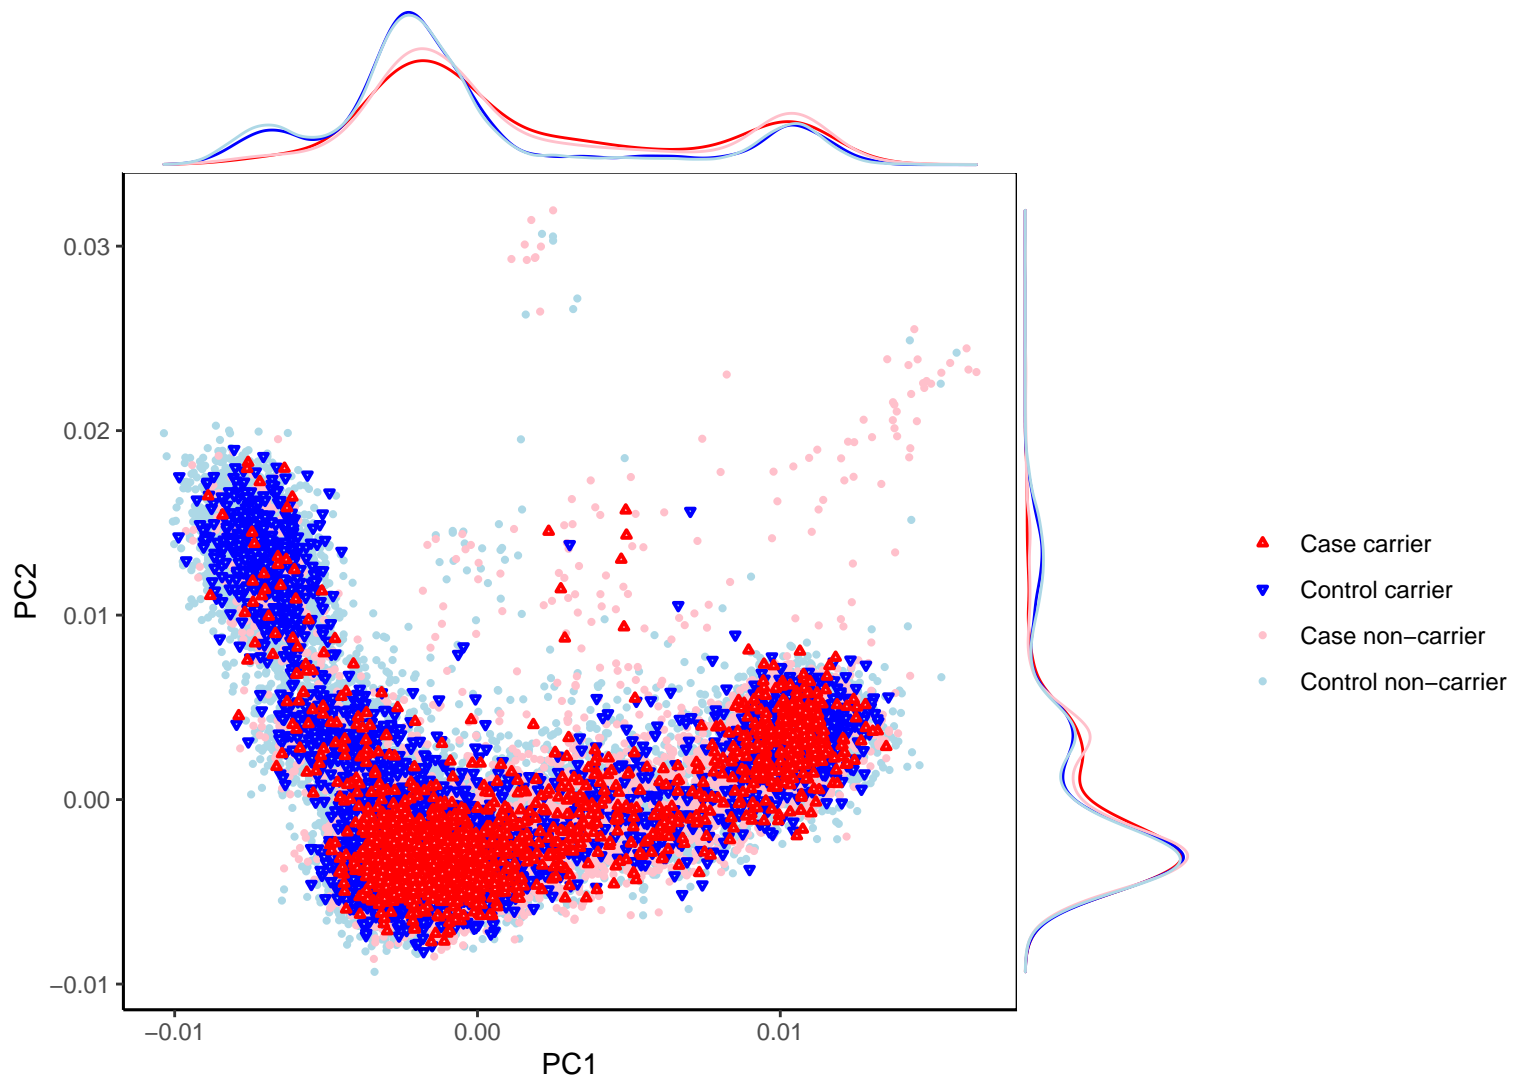



# NEXTERA chr9.136464447\_C\_T

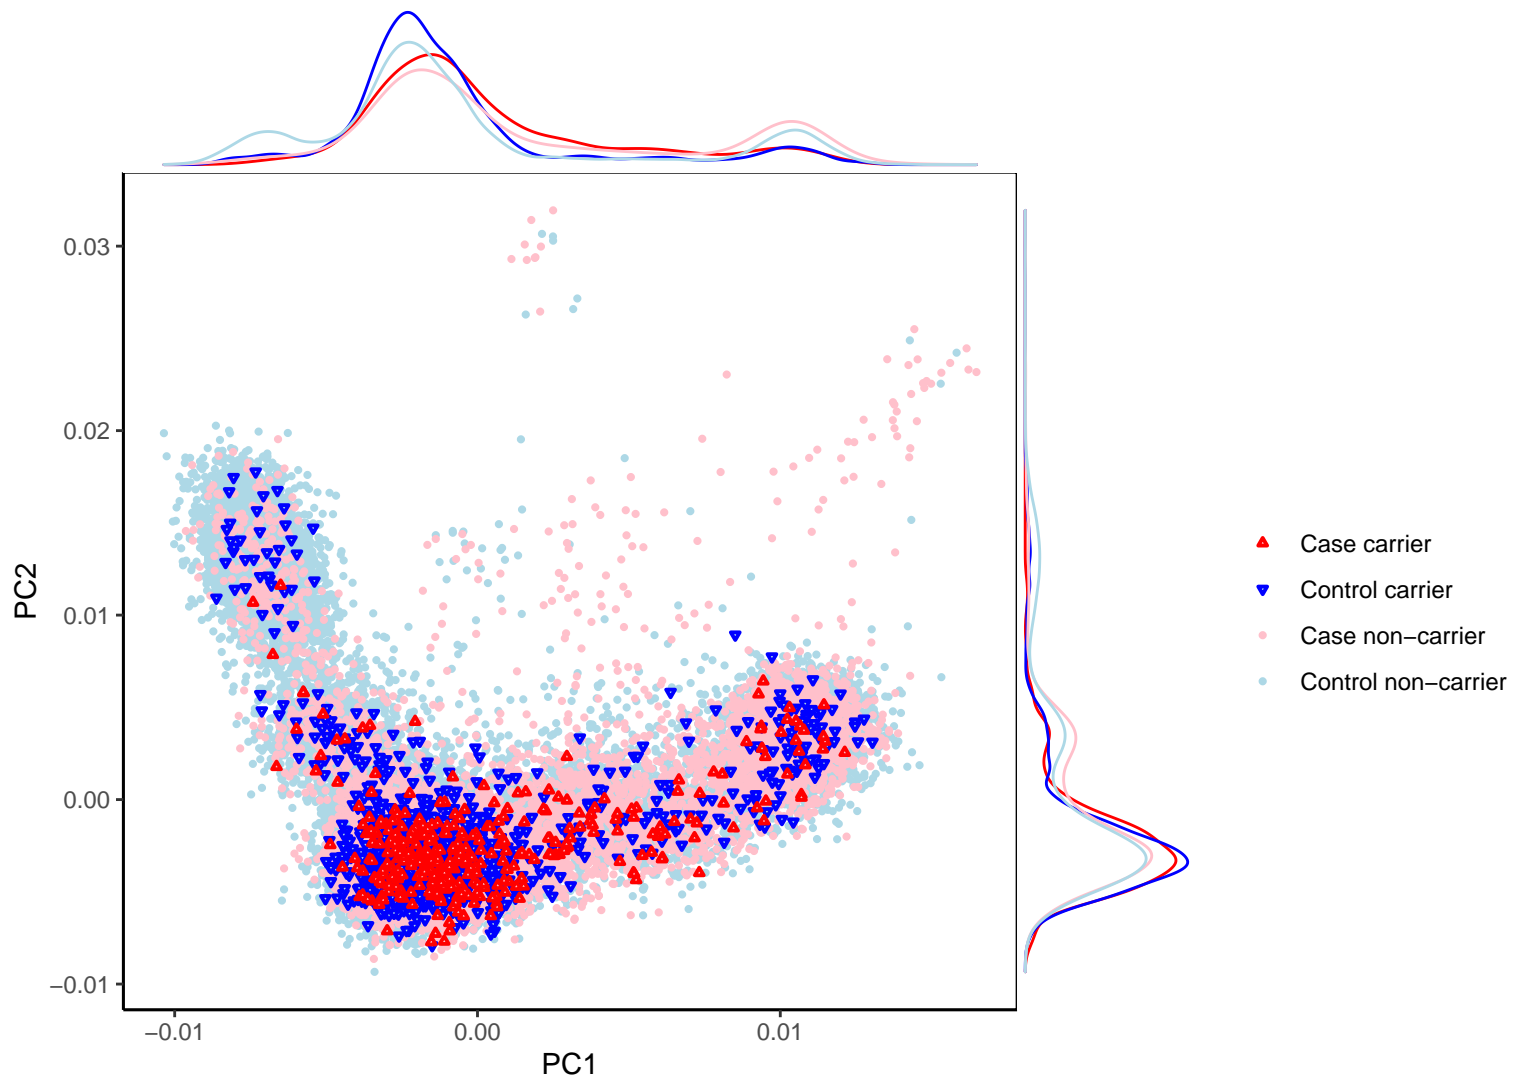

# TWIST chr11.117998788\_C\_T

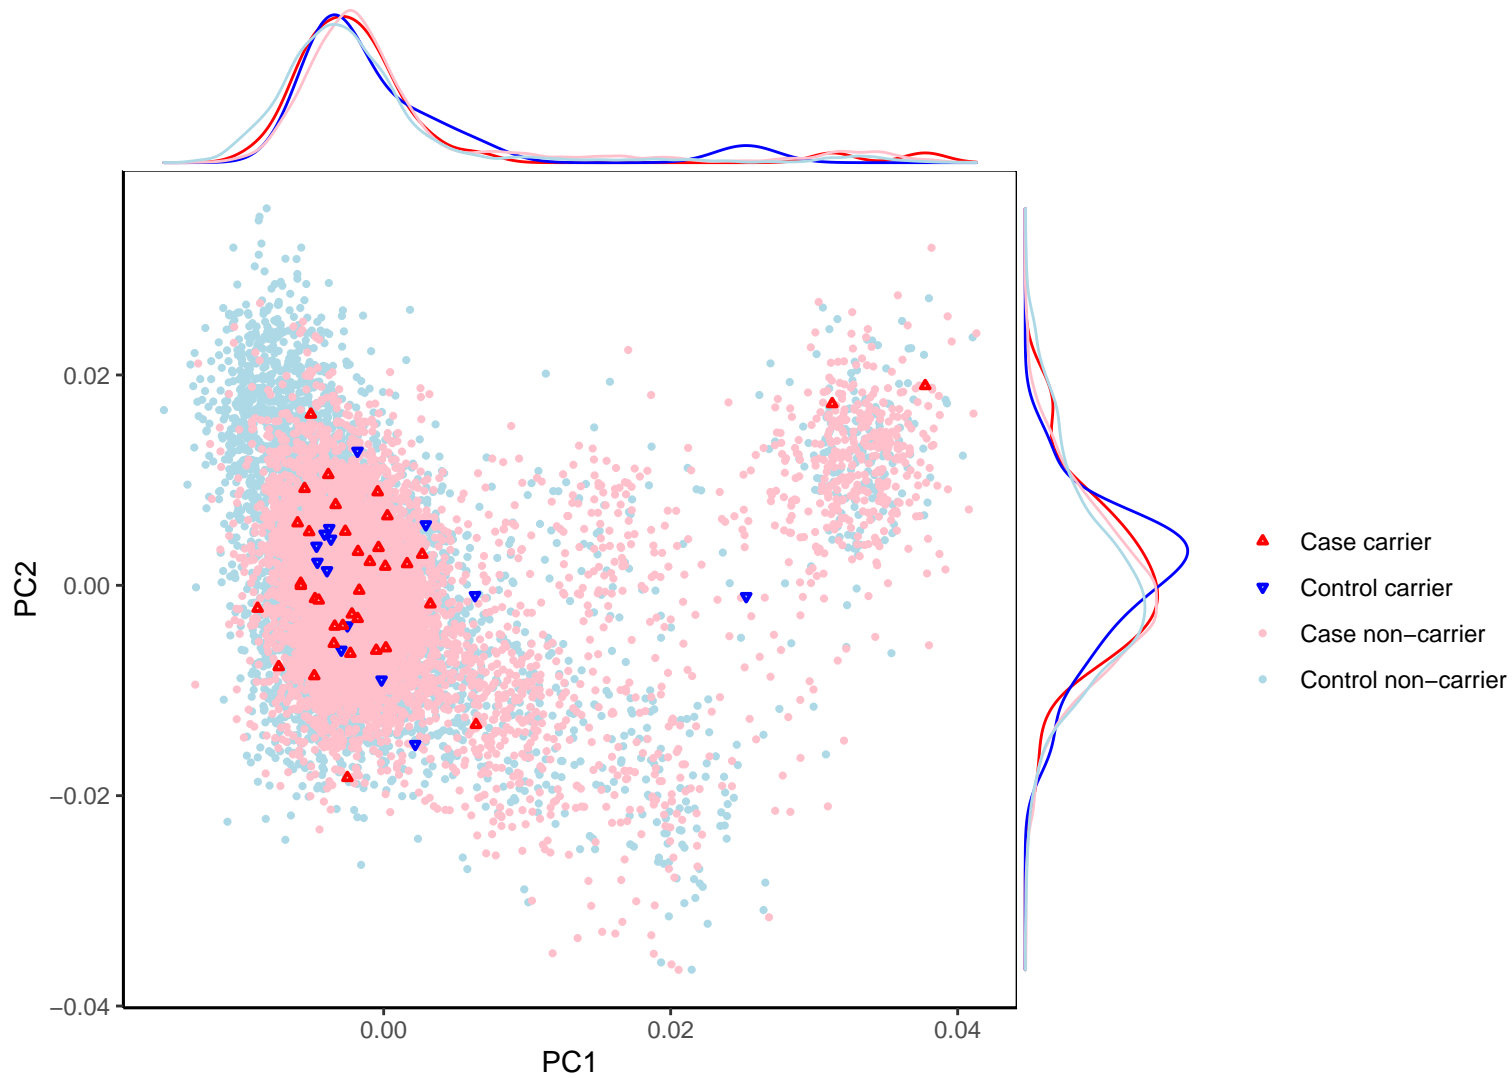

# TWIST chr11.65658293\_C\_T

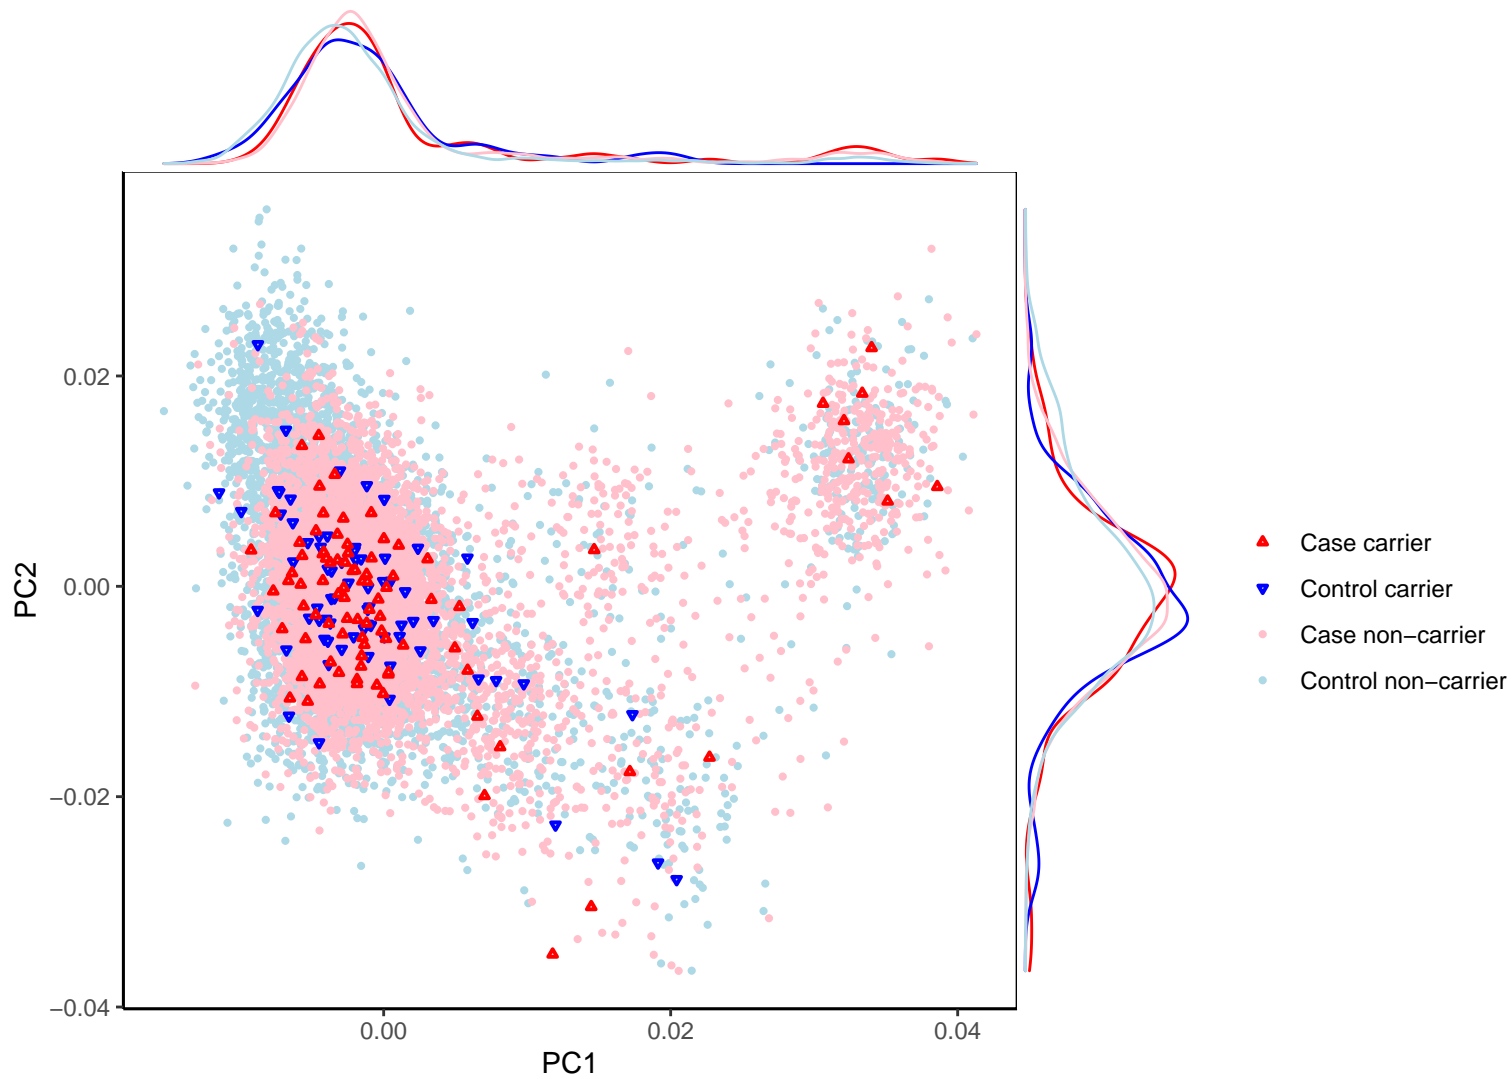

TWIST chr12.40263898\_C\_G

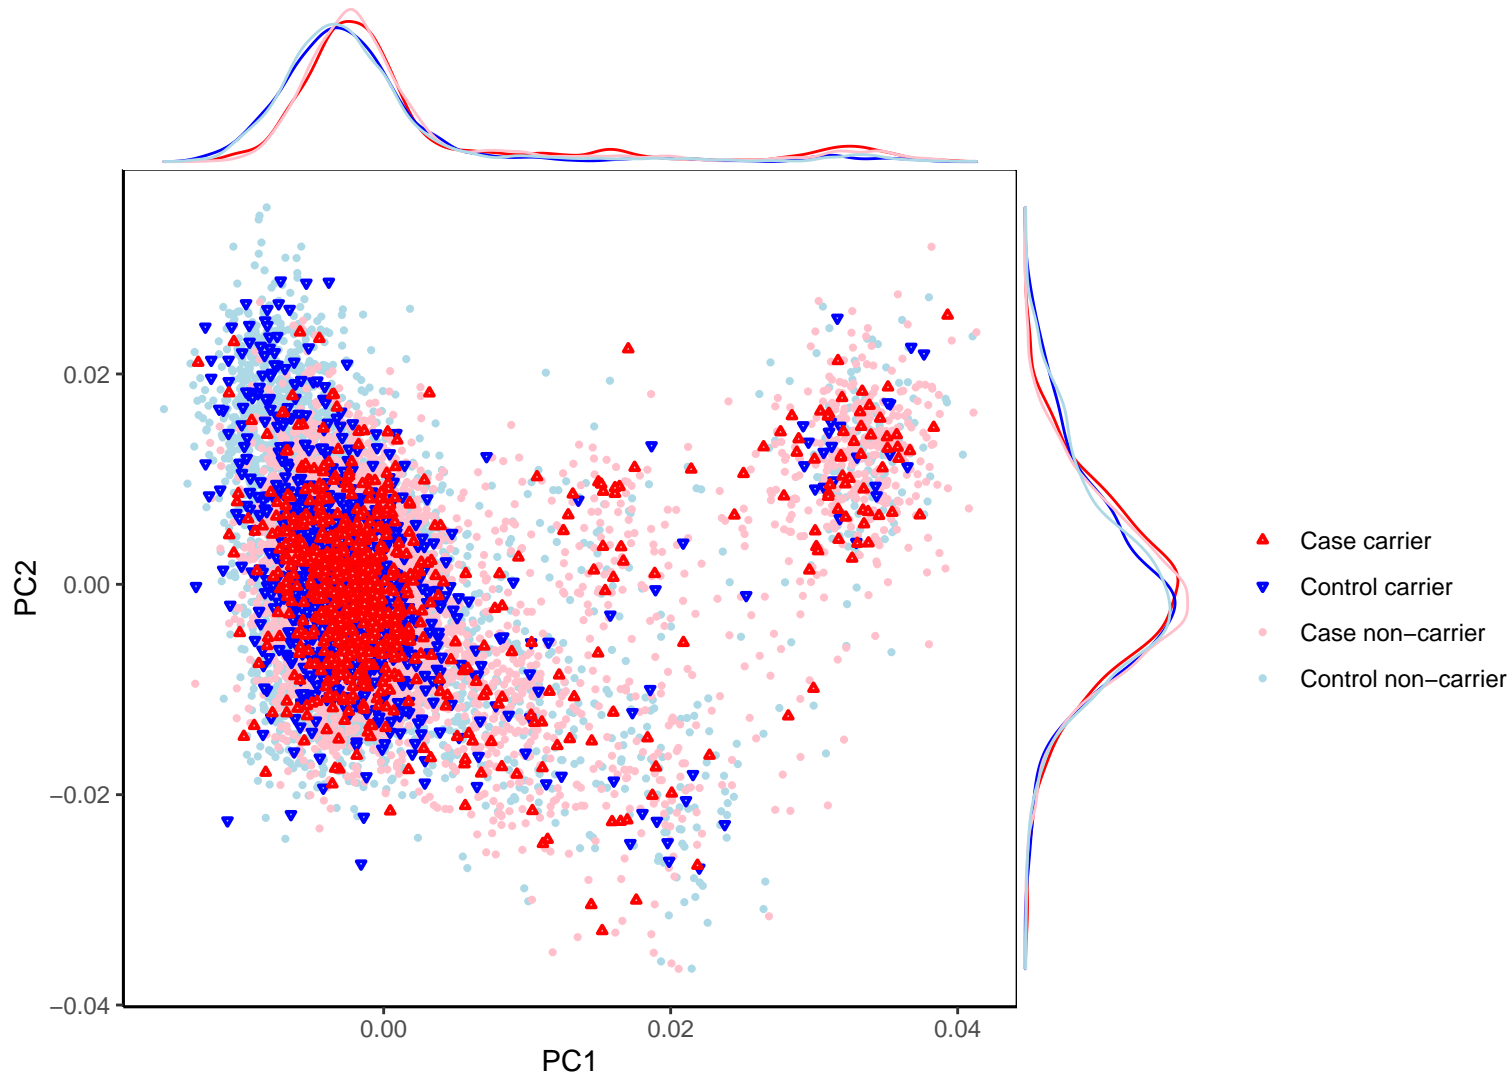

# TWIST chr12.40309109\_G\_A

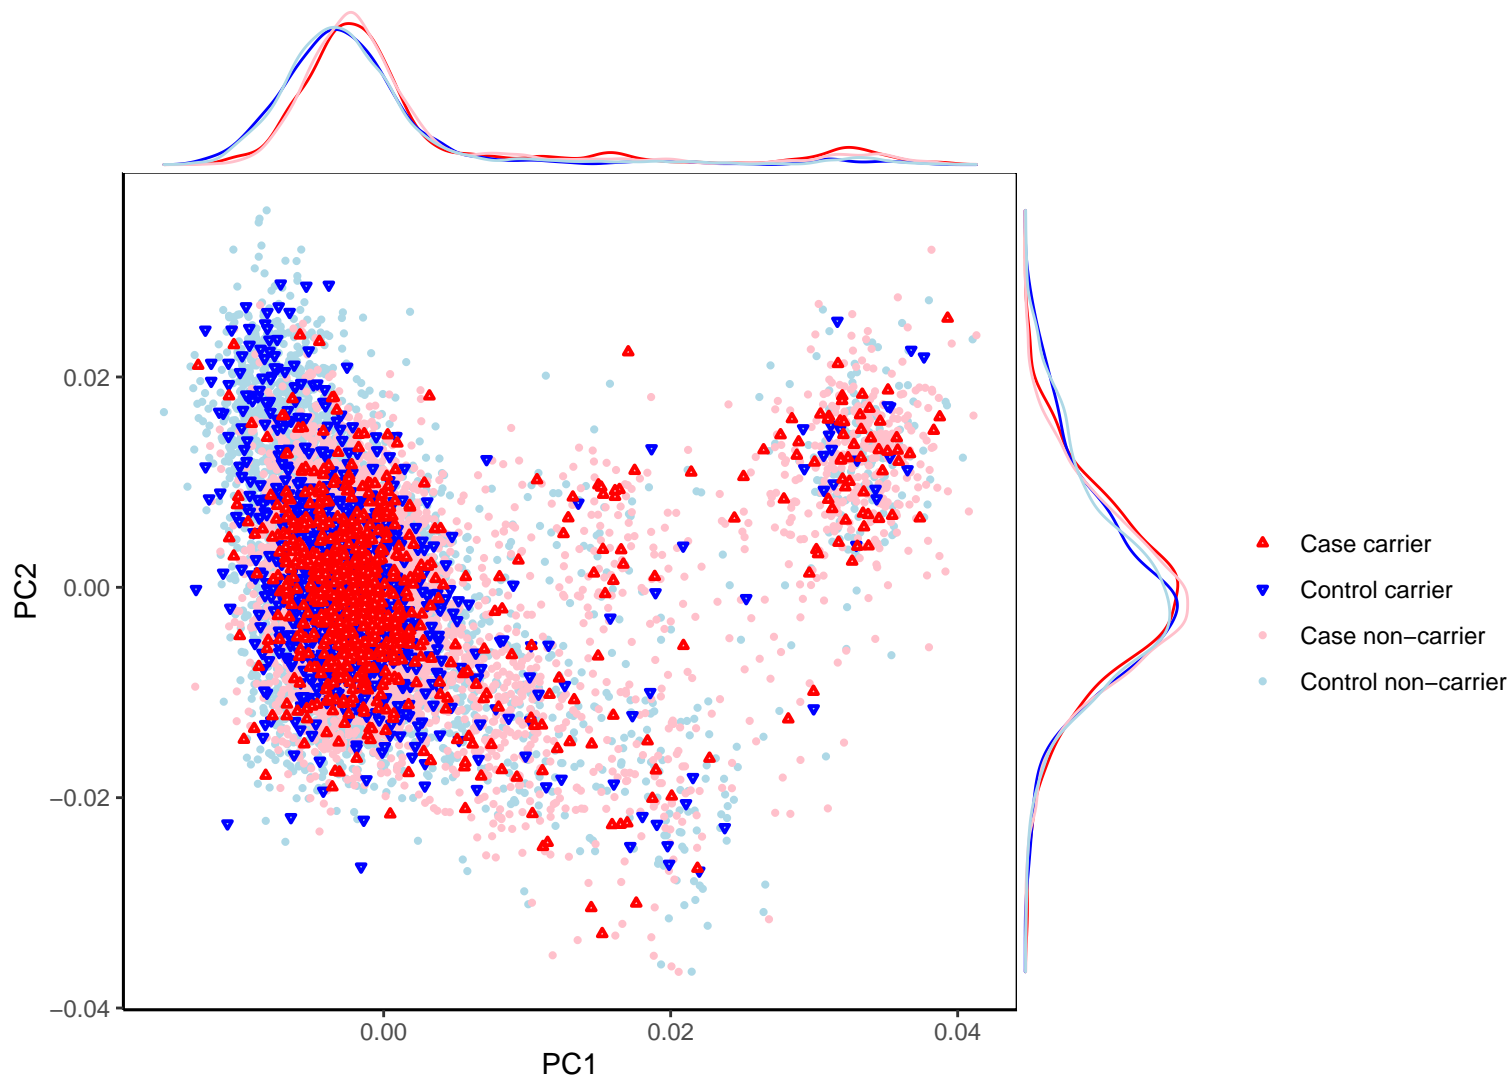

TWIST chr12.40309185\_G\_A

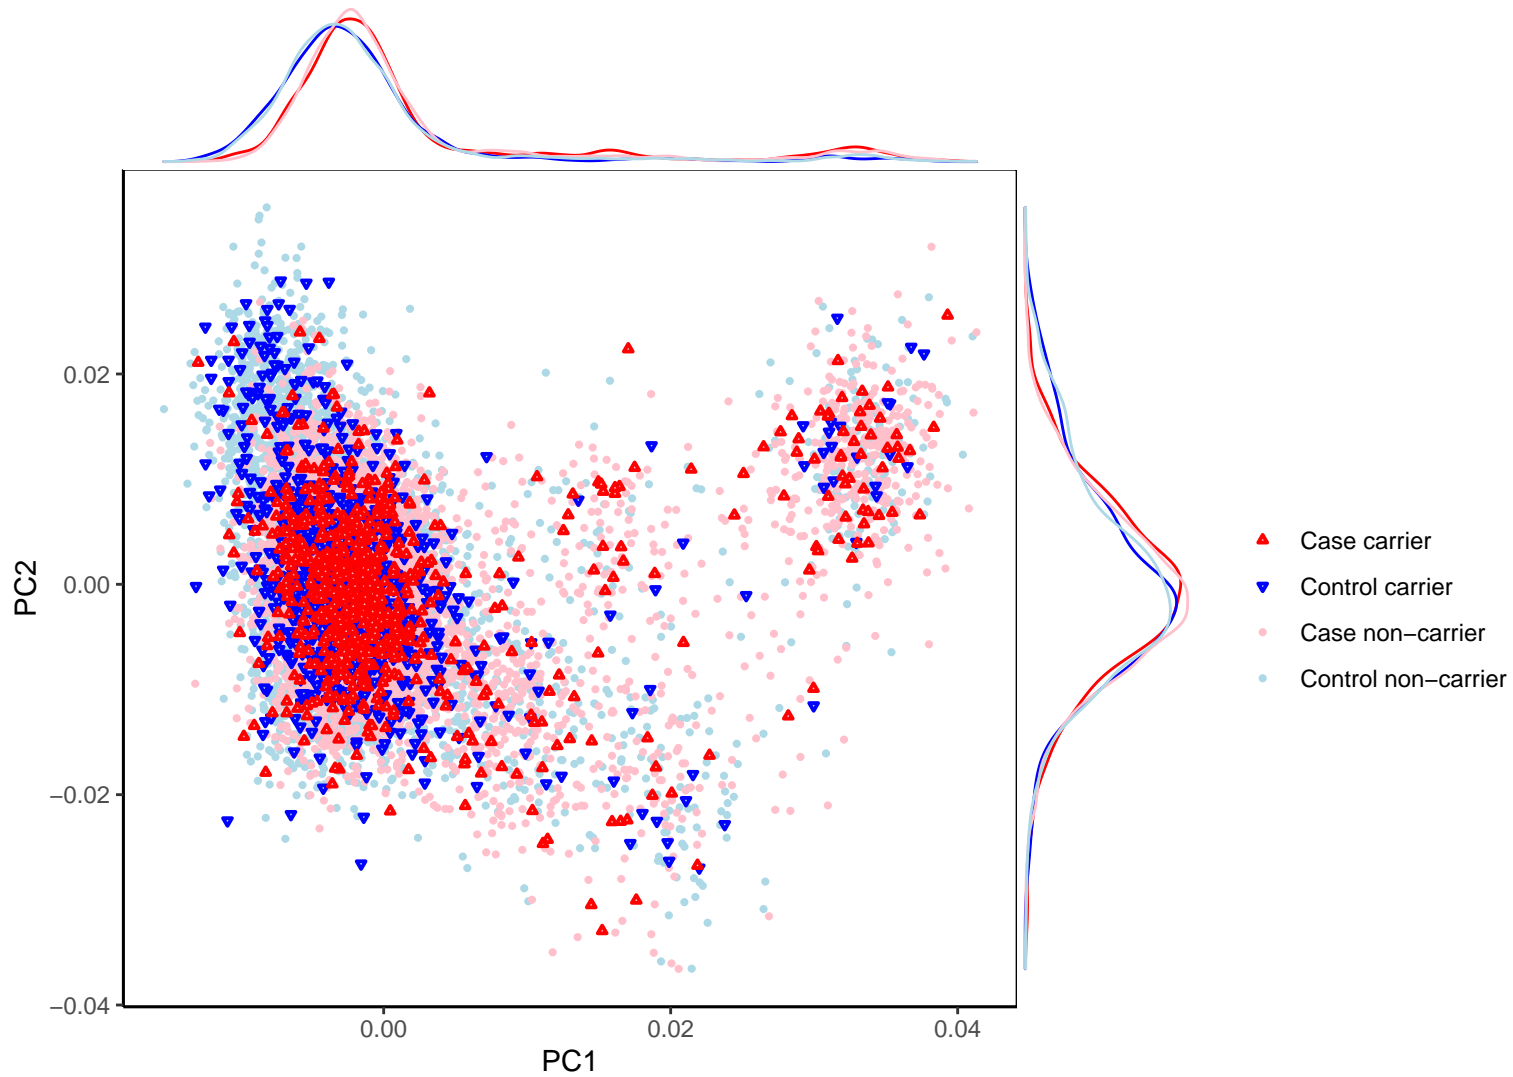

TWIST chr12.40346884\_A\_G

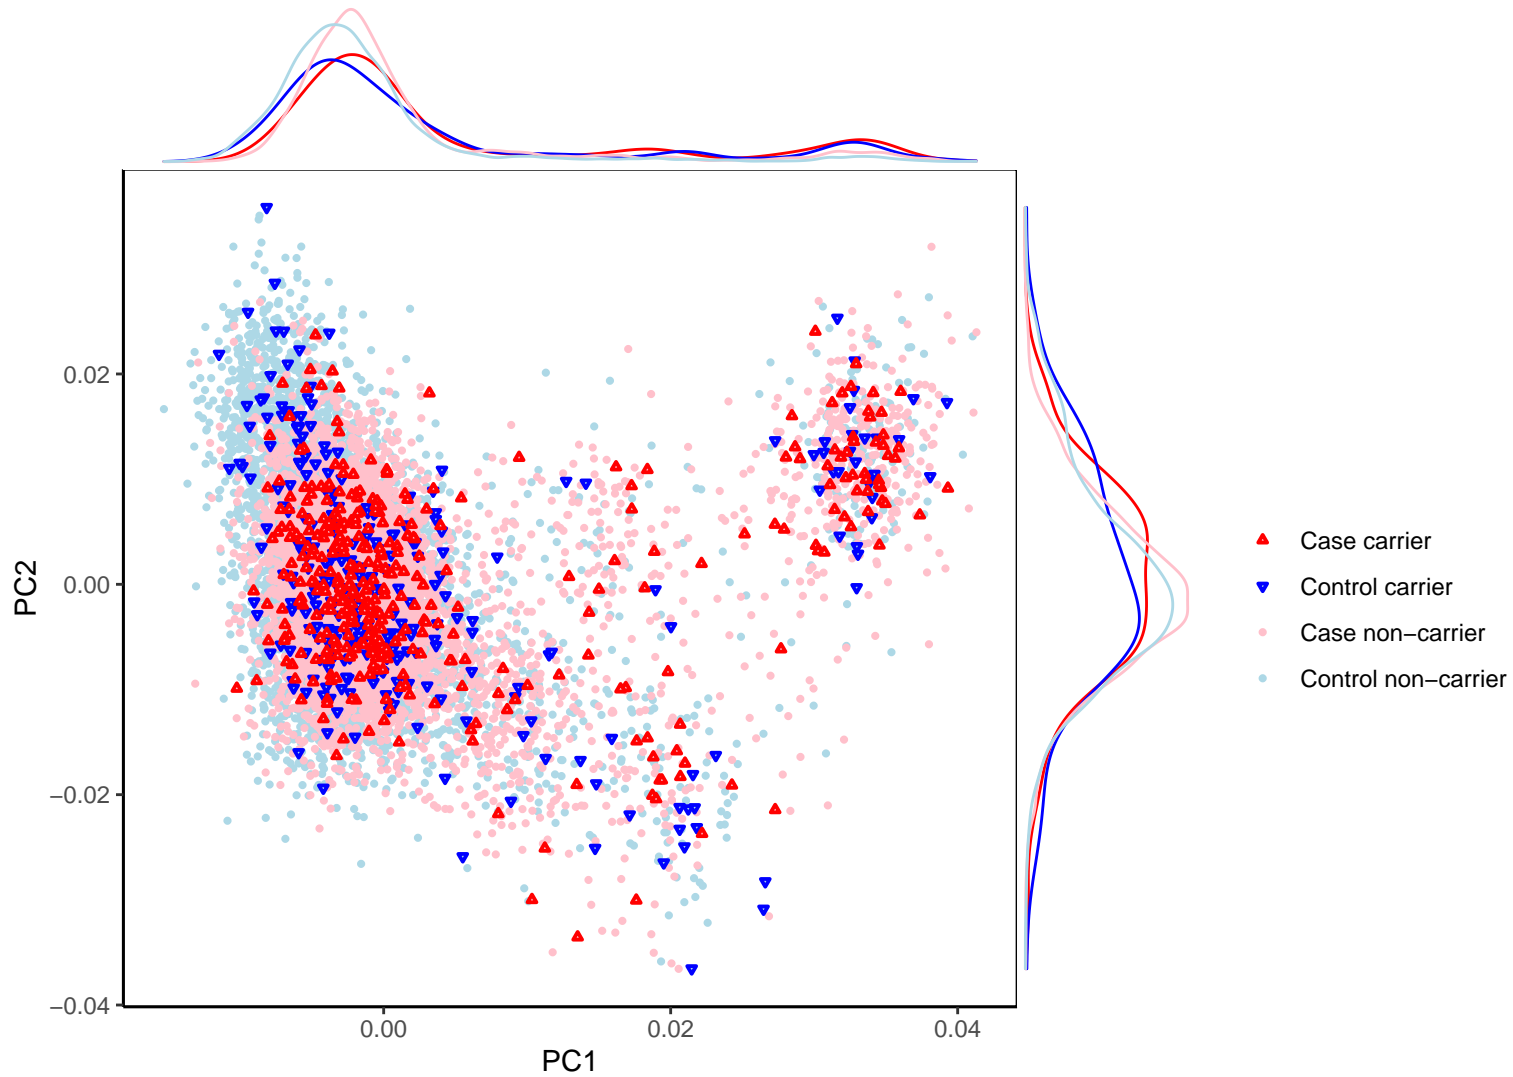

TWIST chr16.50668046\_G\_A

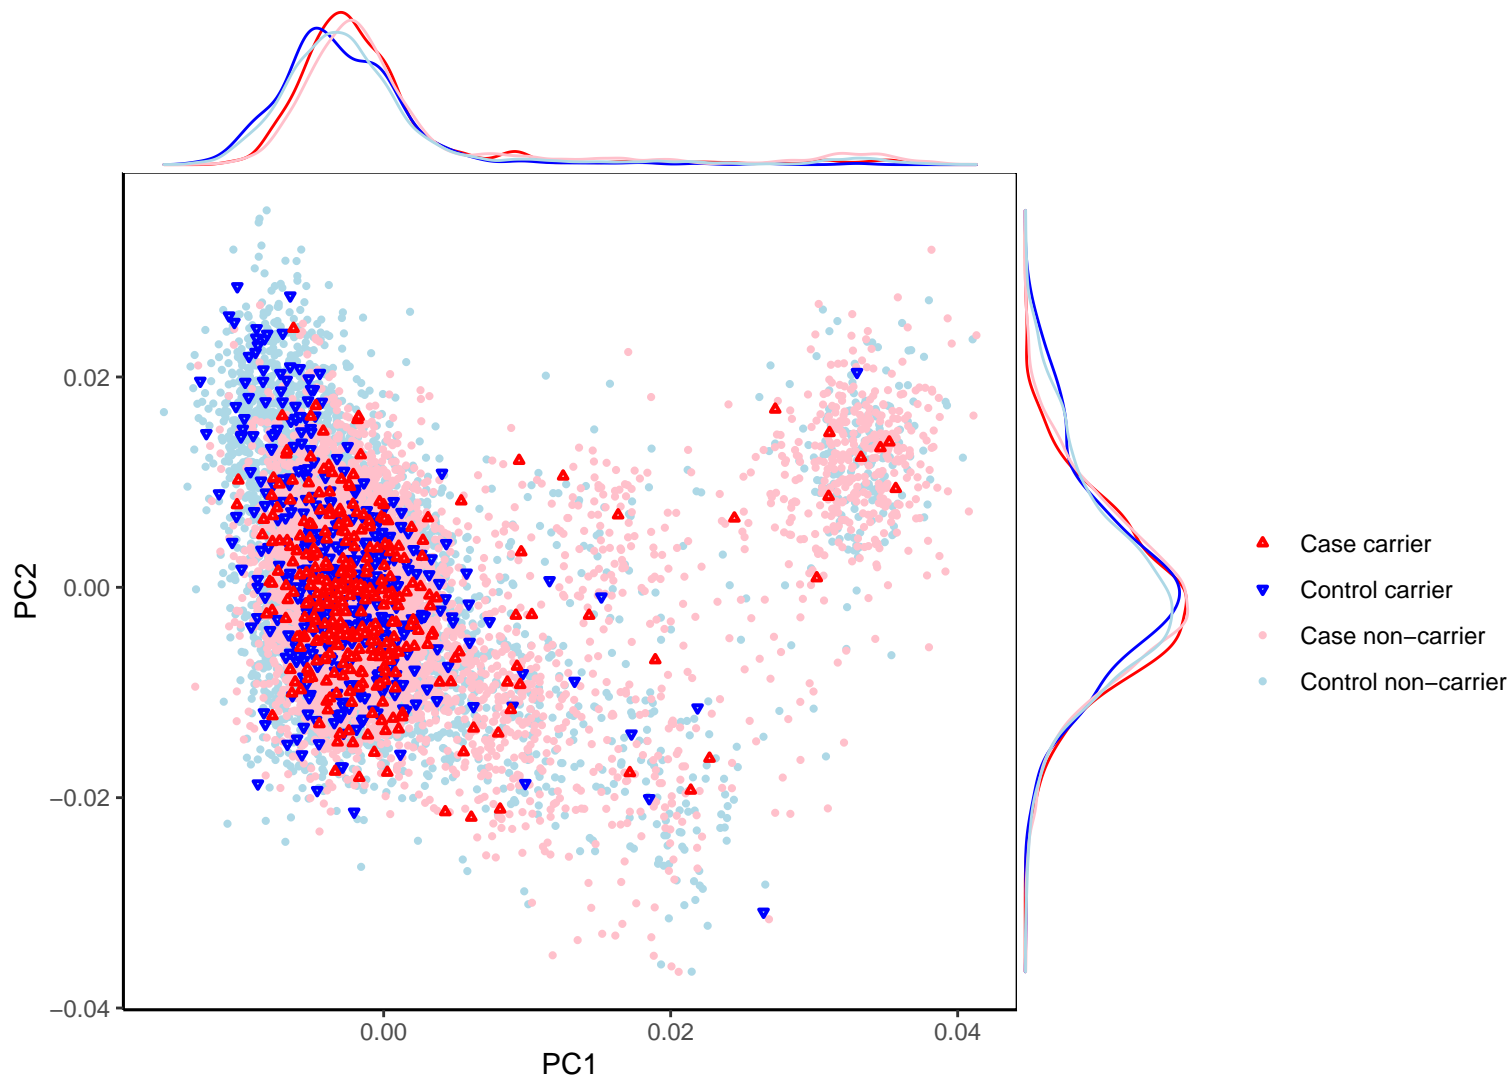



TWIST chr16.50669105\_C\_T

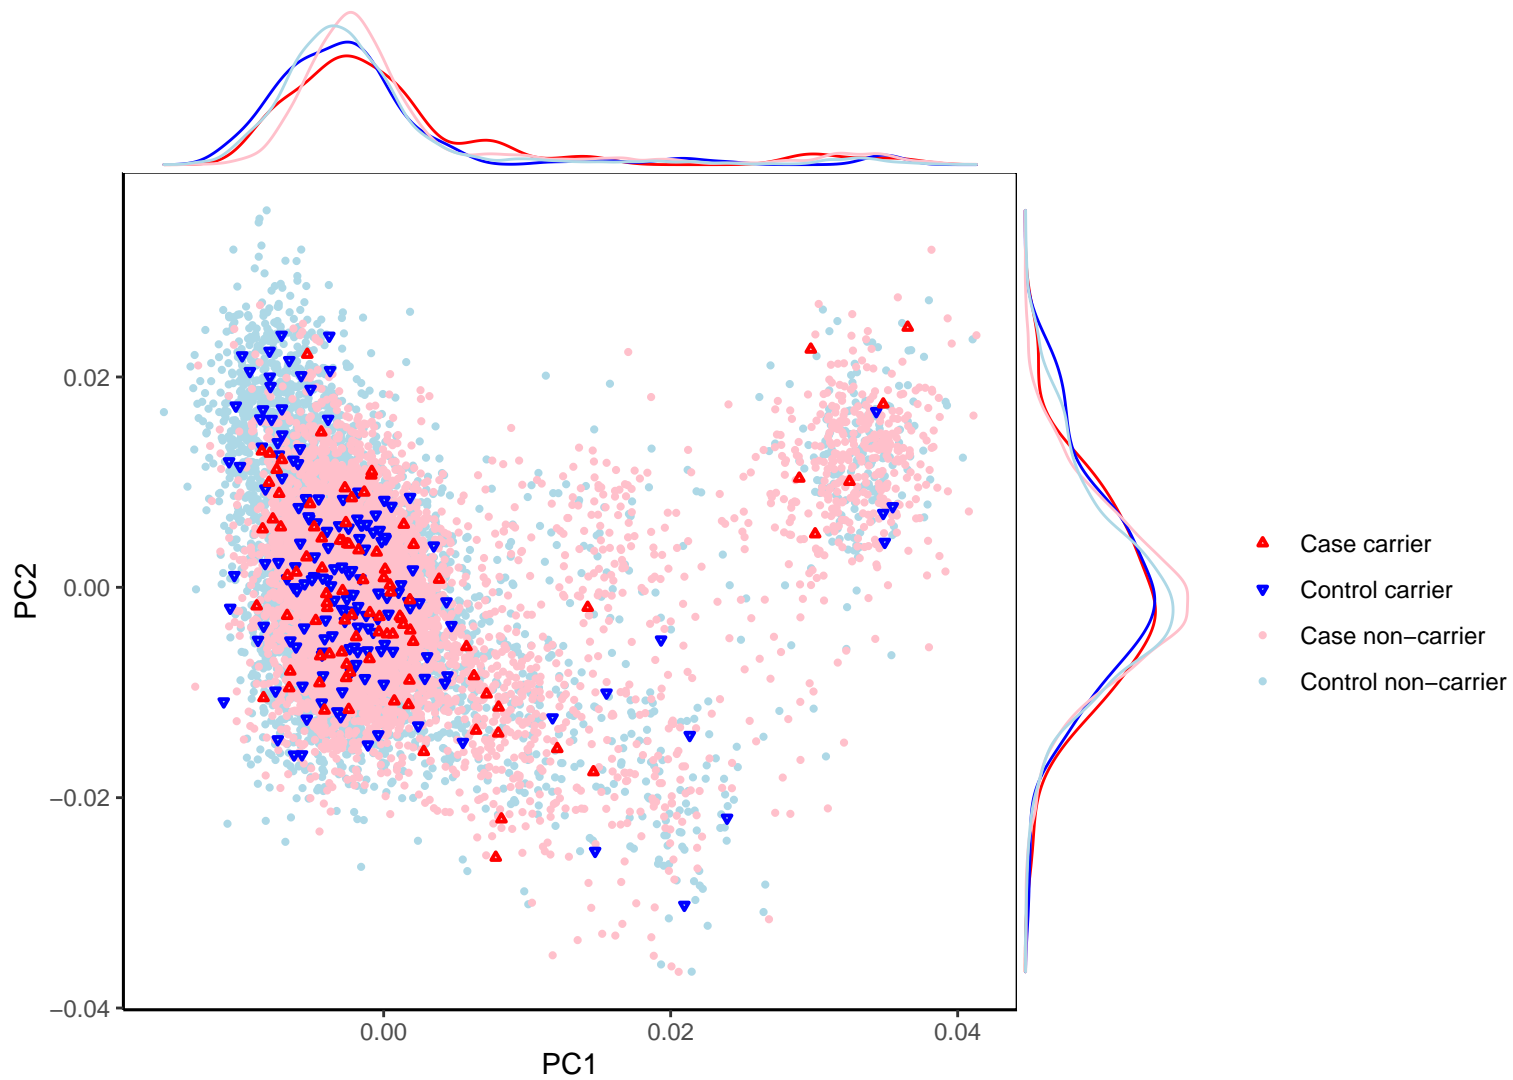

# TWIST chr16.50699481\_T\_A

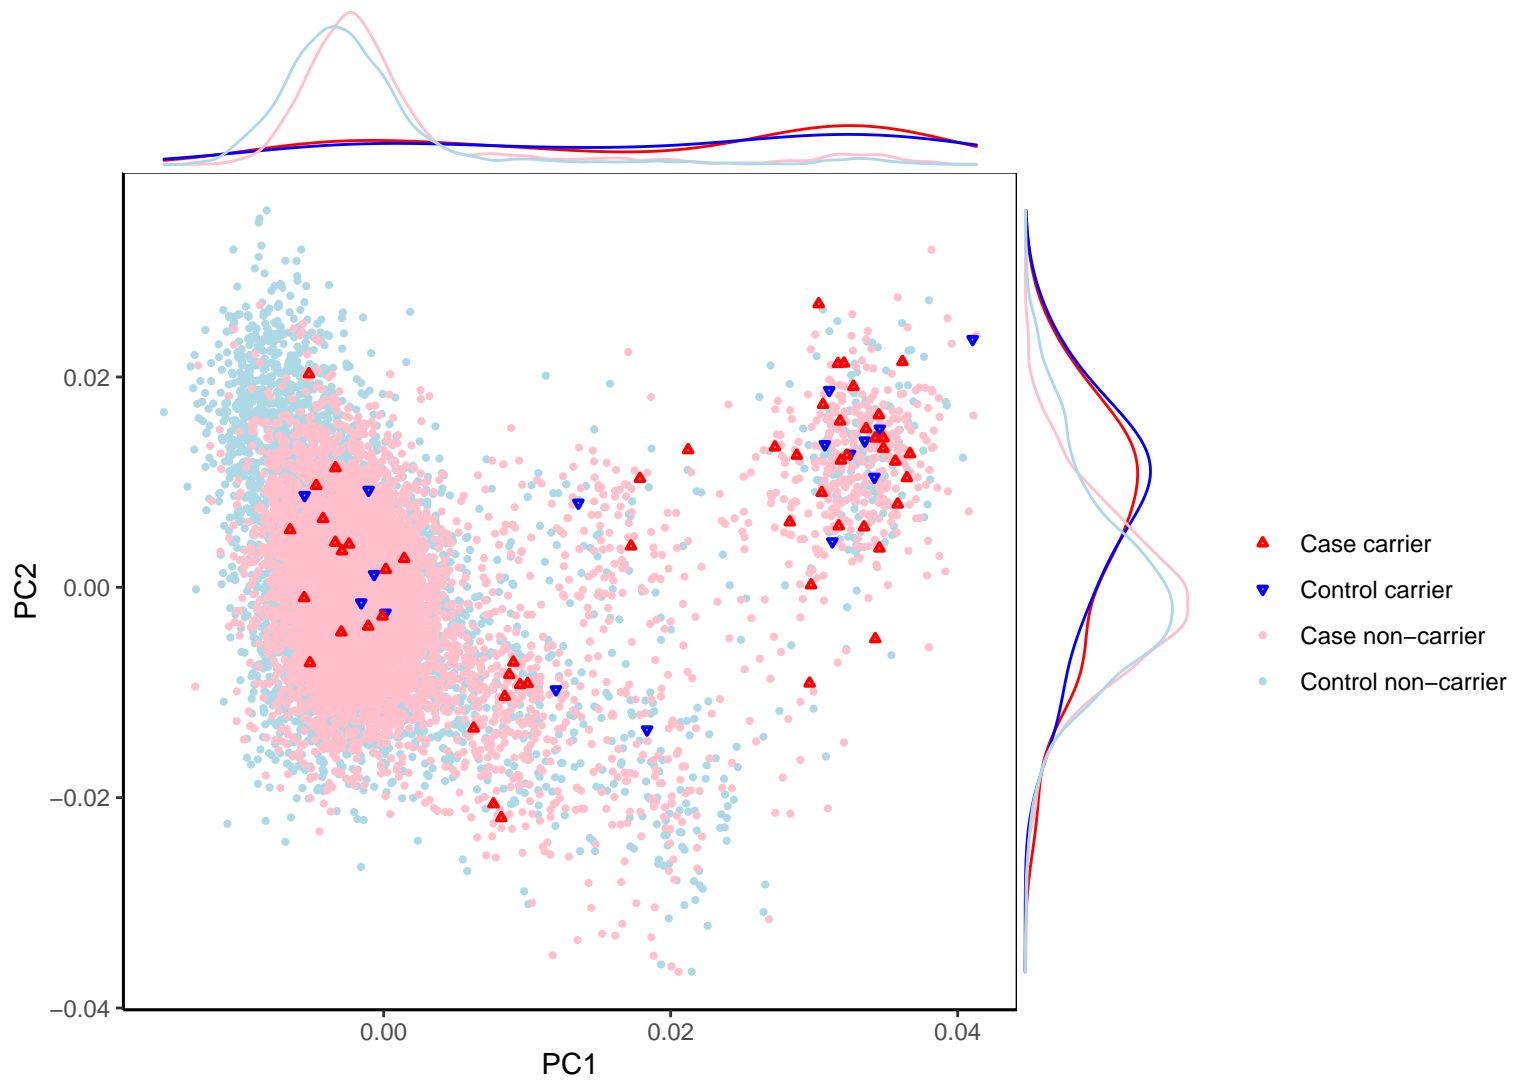

# TWIST chr16.50699554\_C\_T

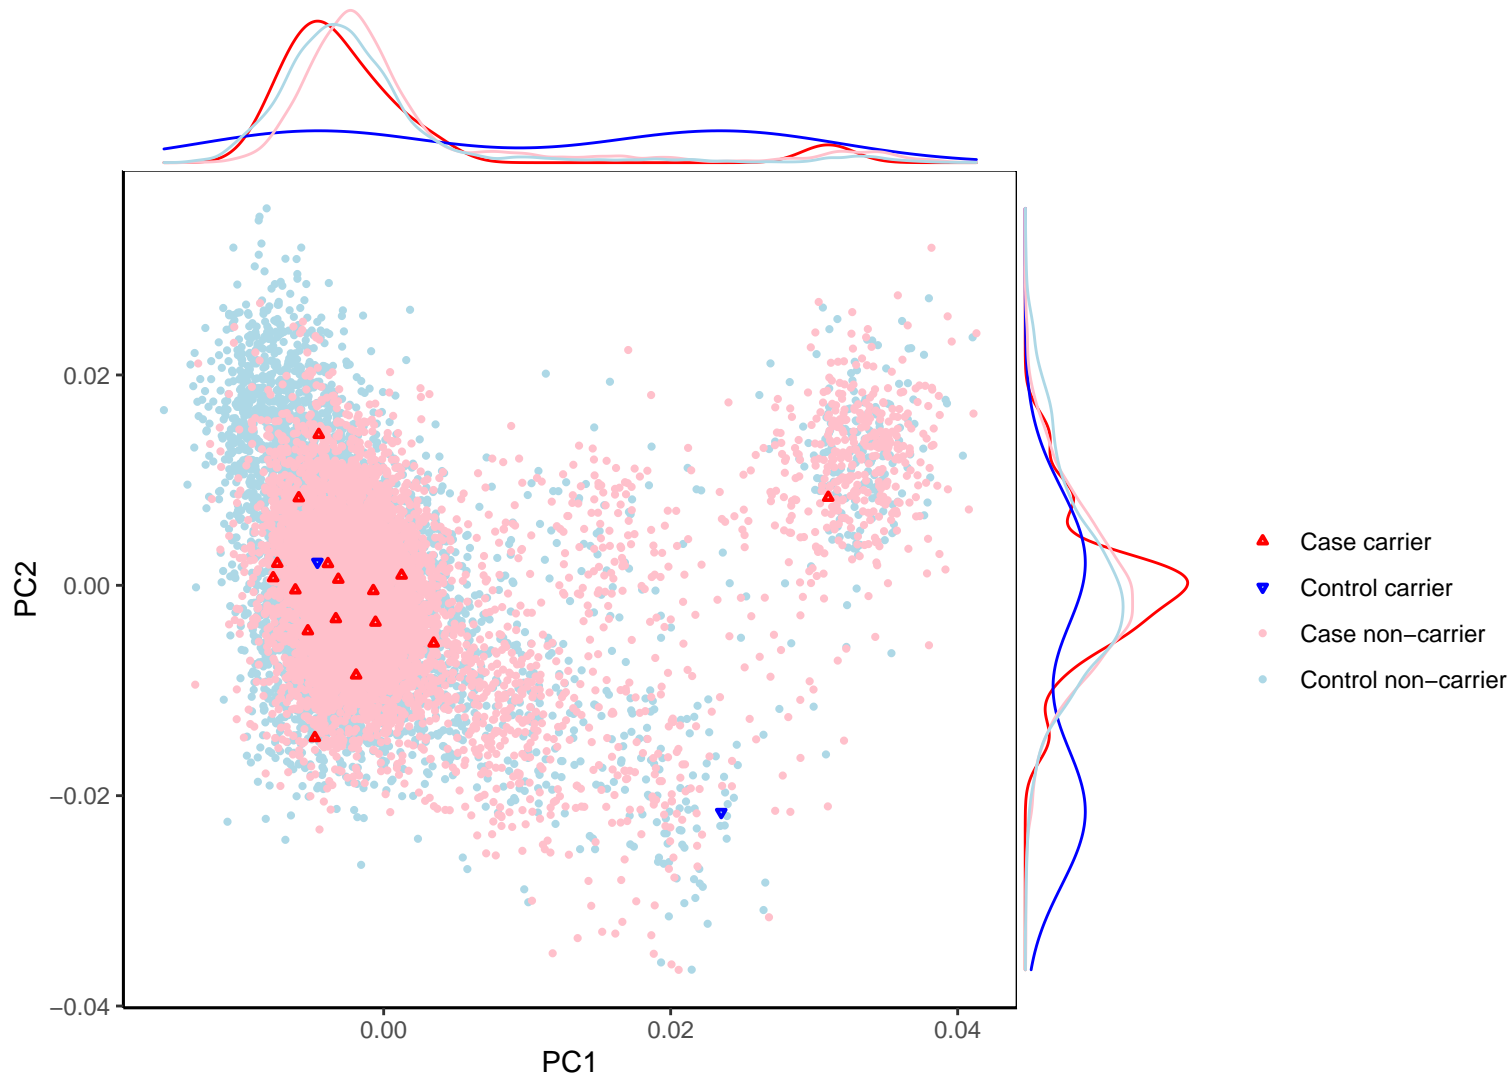

TWIST chr16.50710654\_T\_G

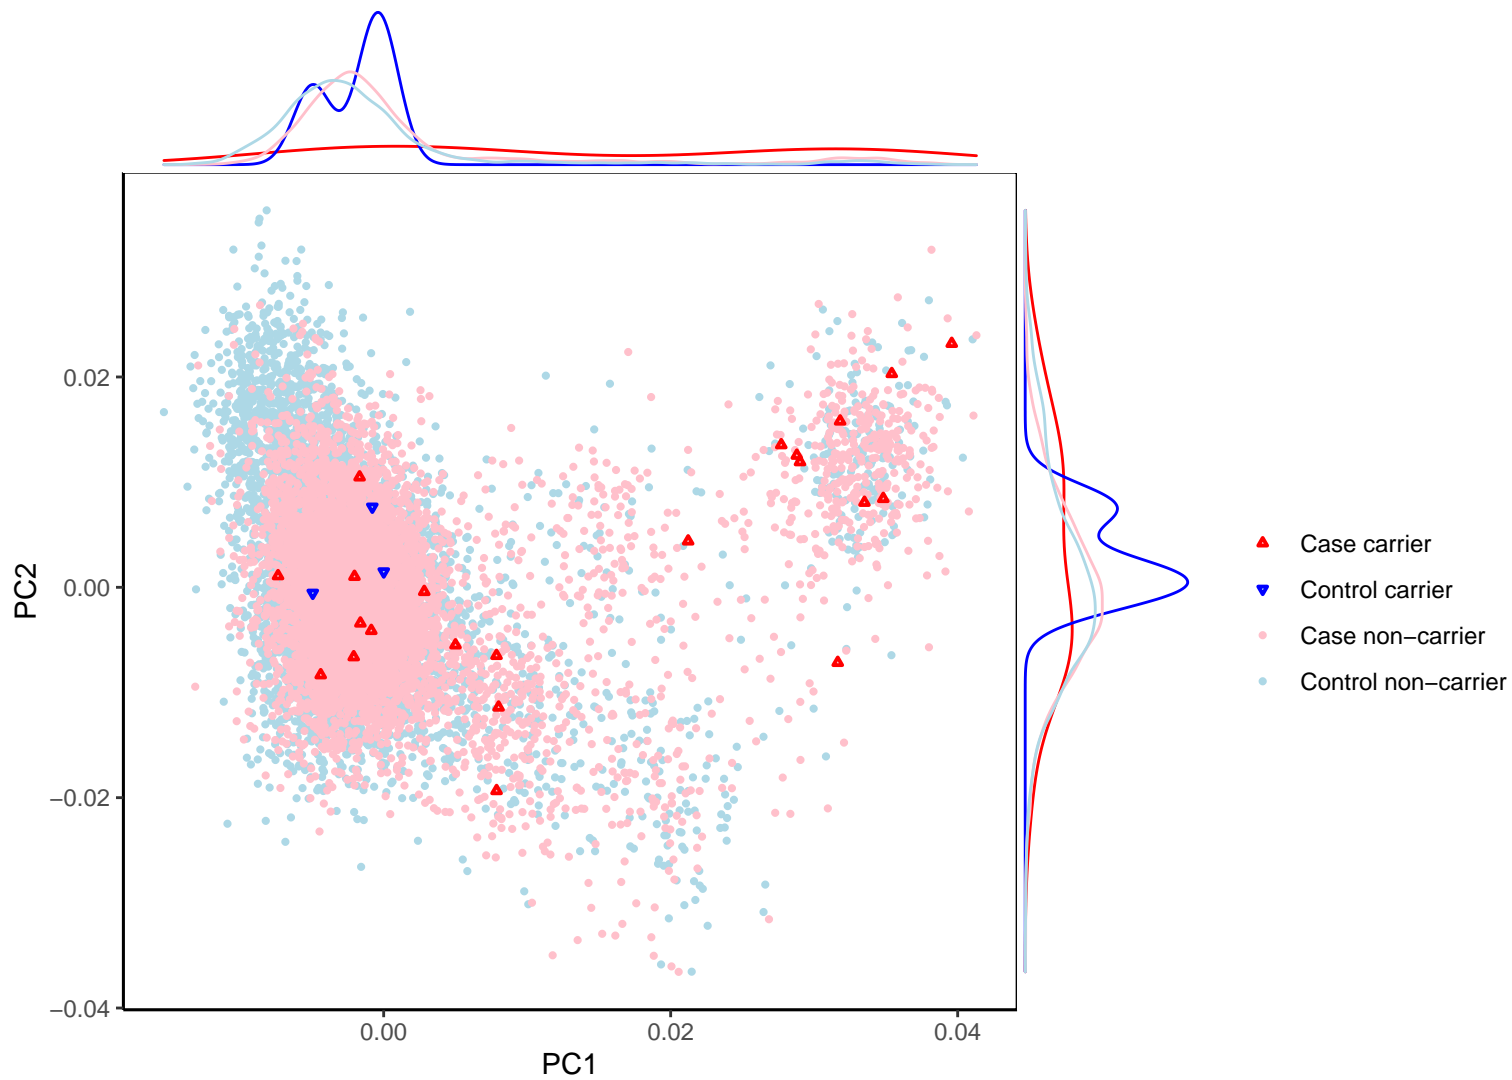

# TWIST chr16.50711203\_C\_T

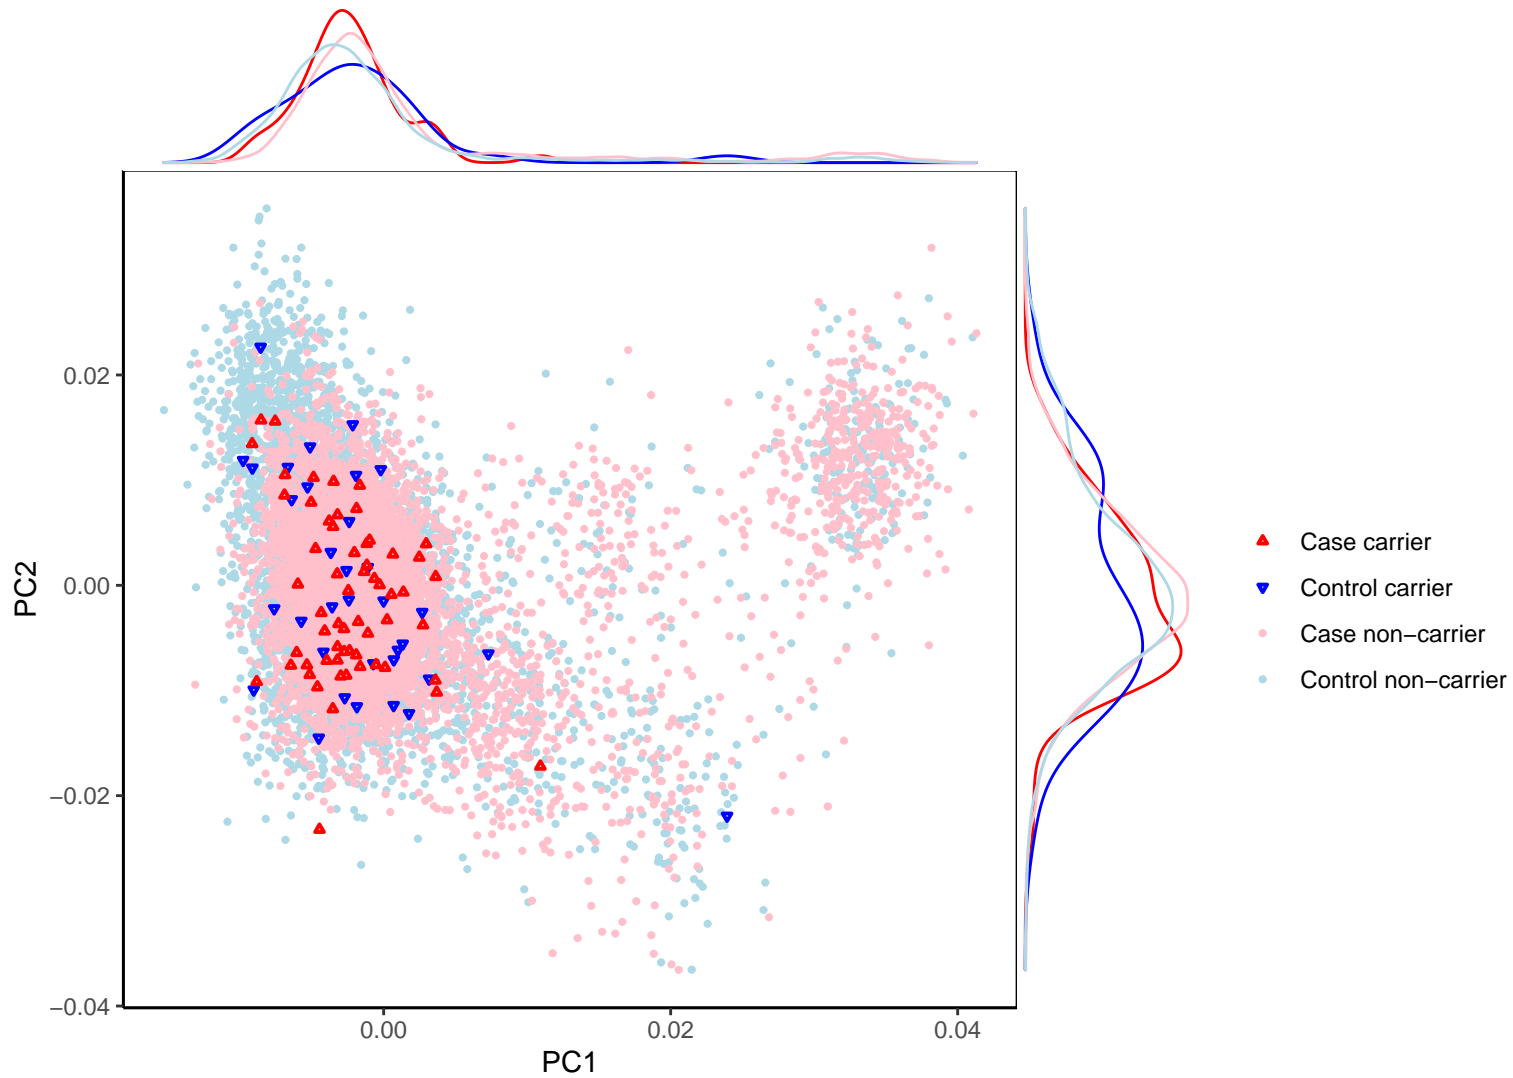

# TWIST chr16.50711745\_G\_A

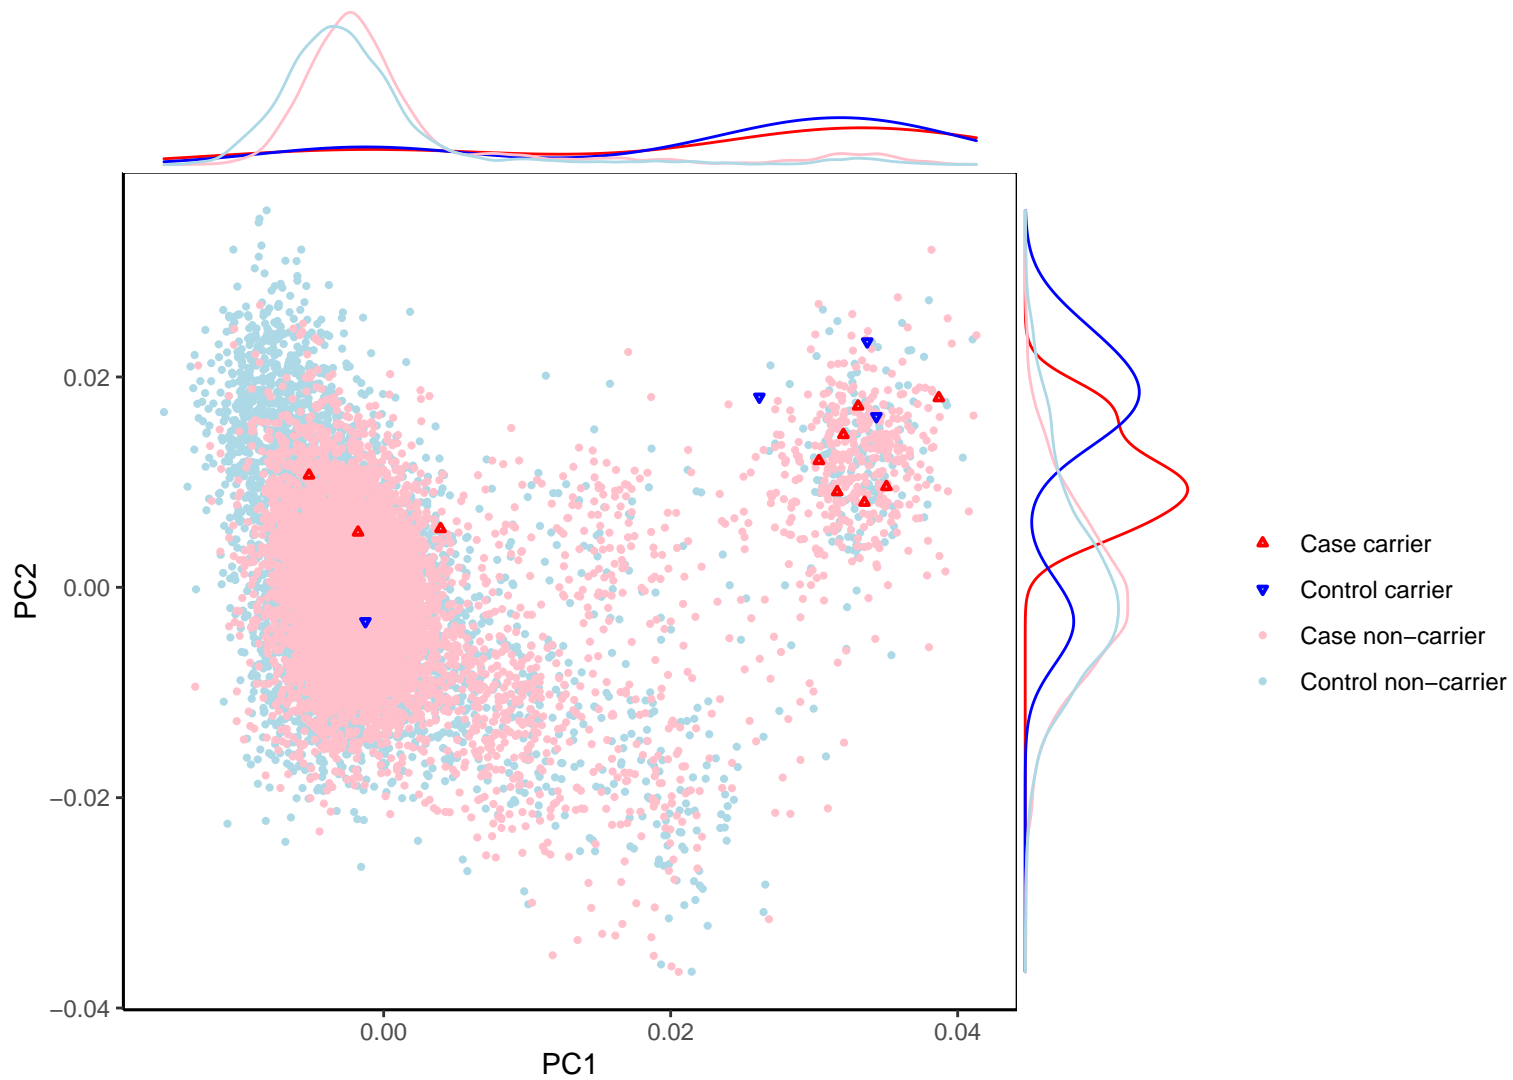

# TWIST chr16.50712015\_C\_T

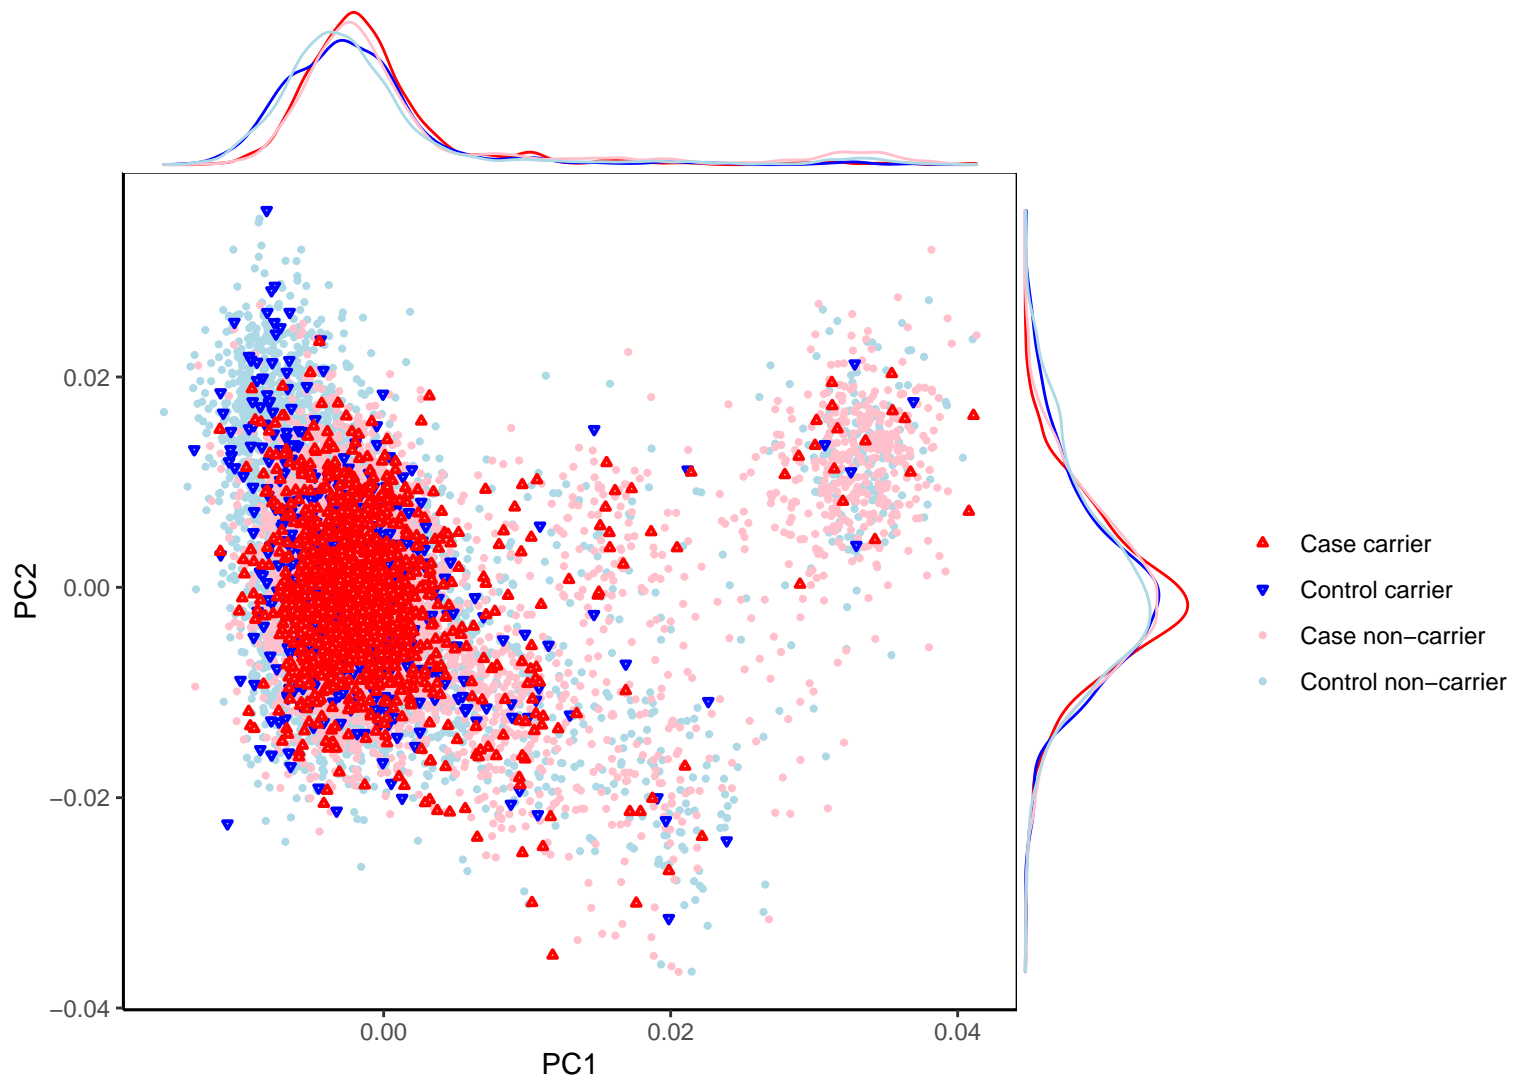

# TWIST chr16.50712018\_C\_T

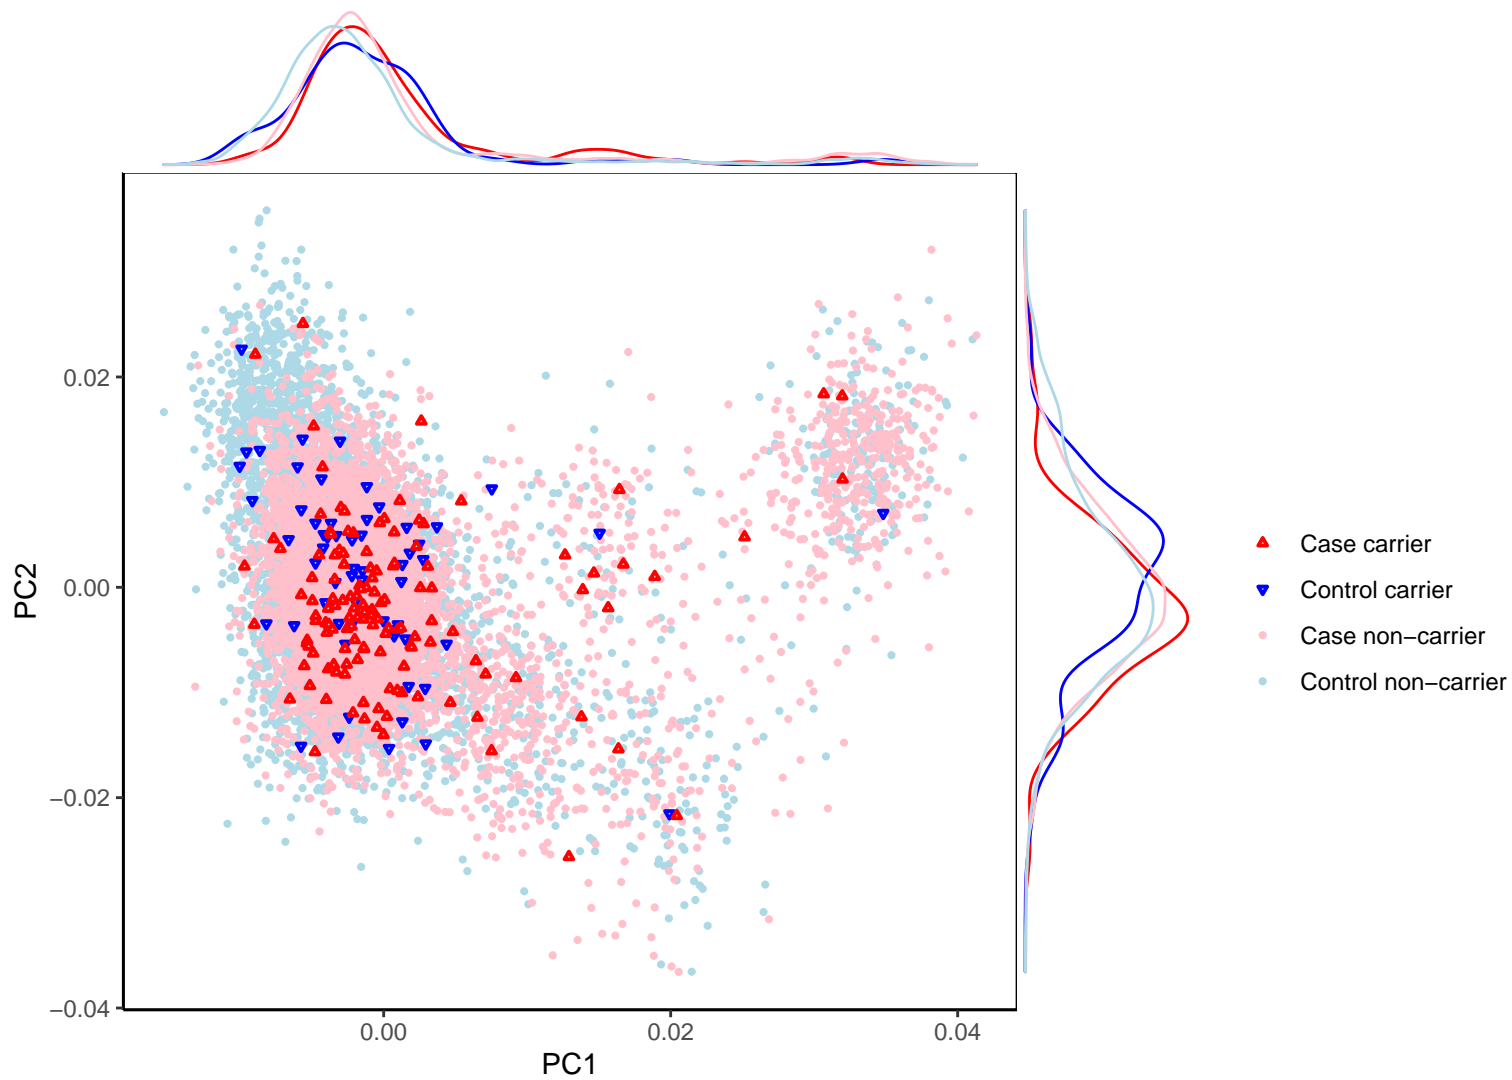



# TWIST chr16.50712175\_C\_T

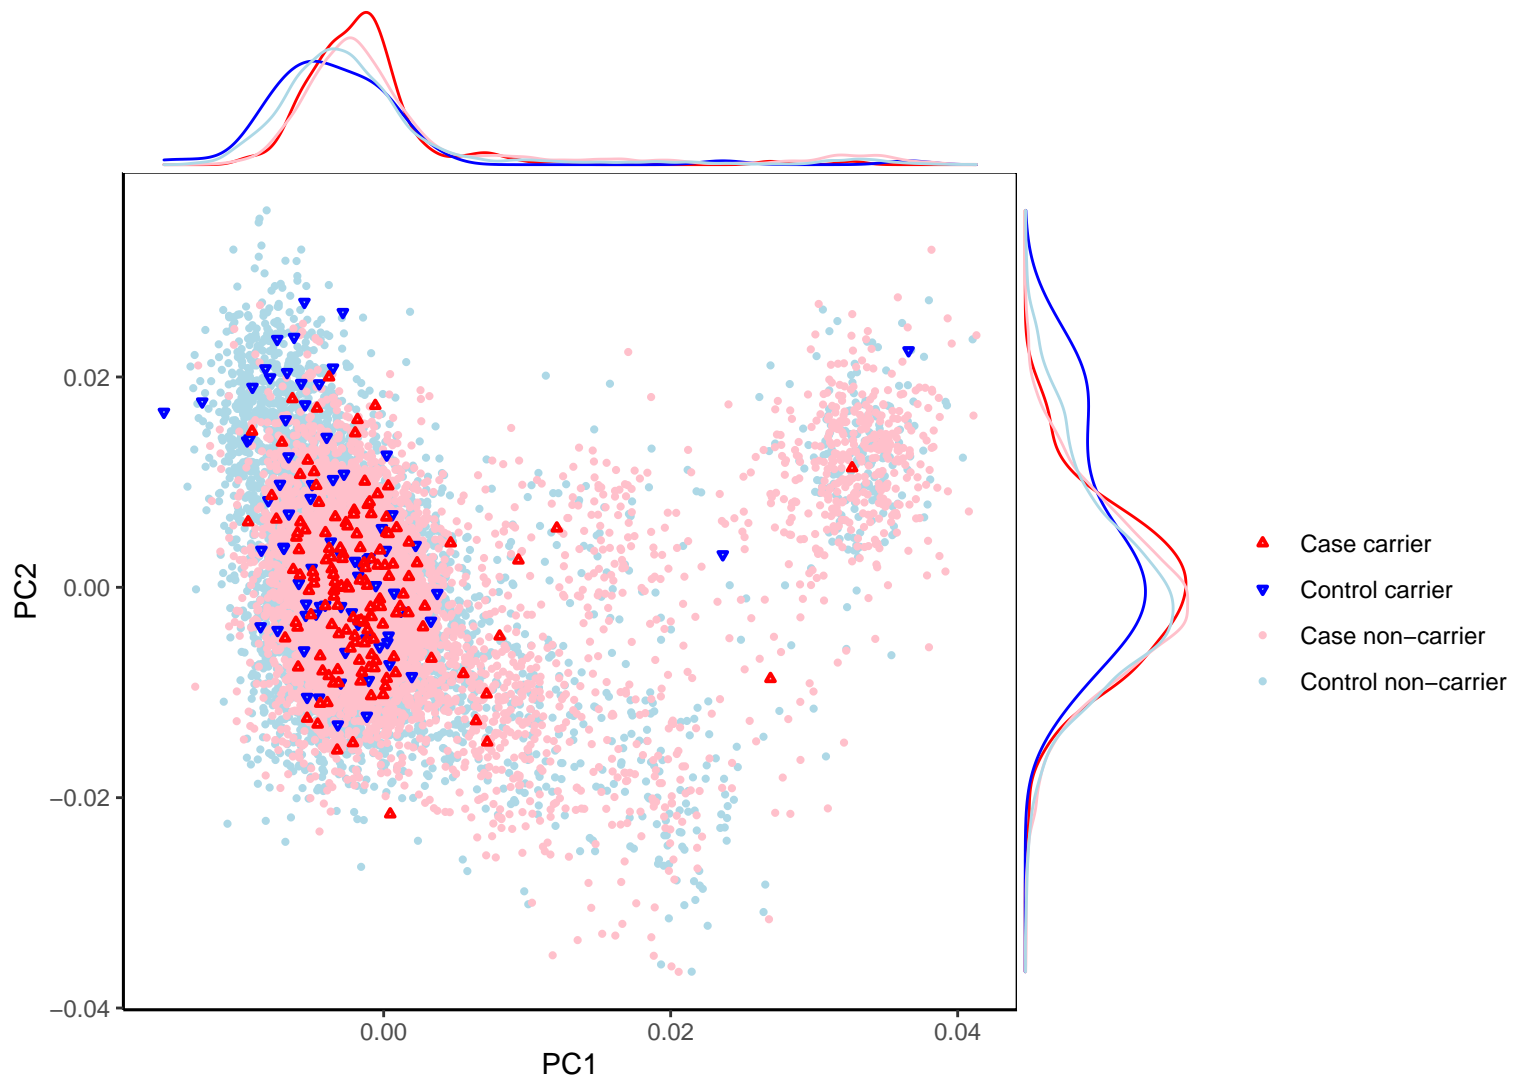

# TWIST chr16.50712243\_G\_A

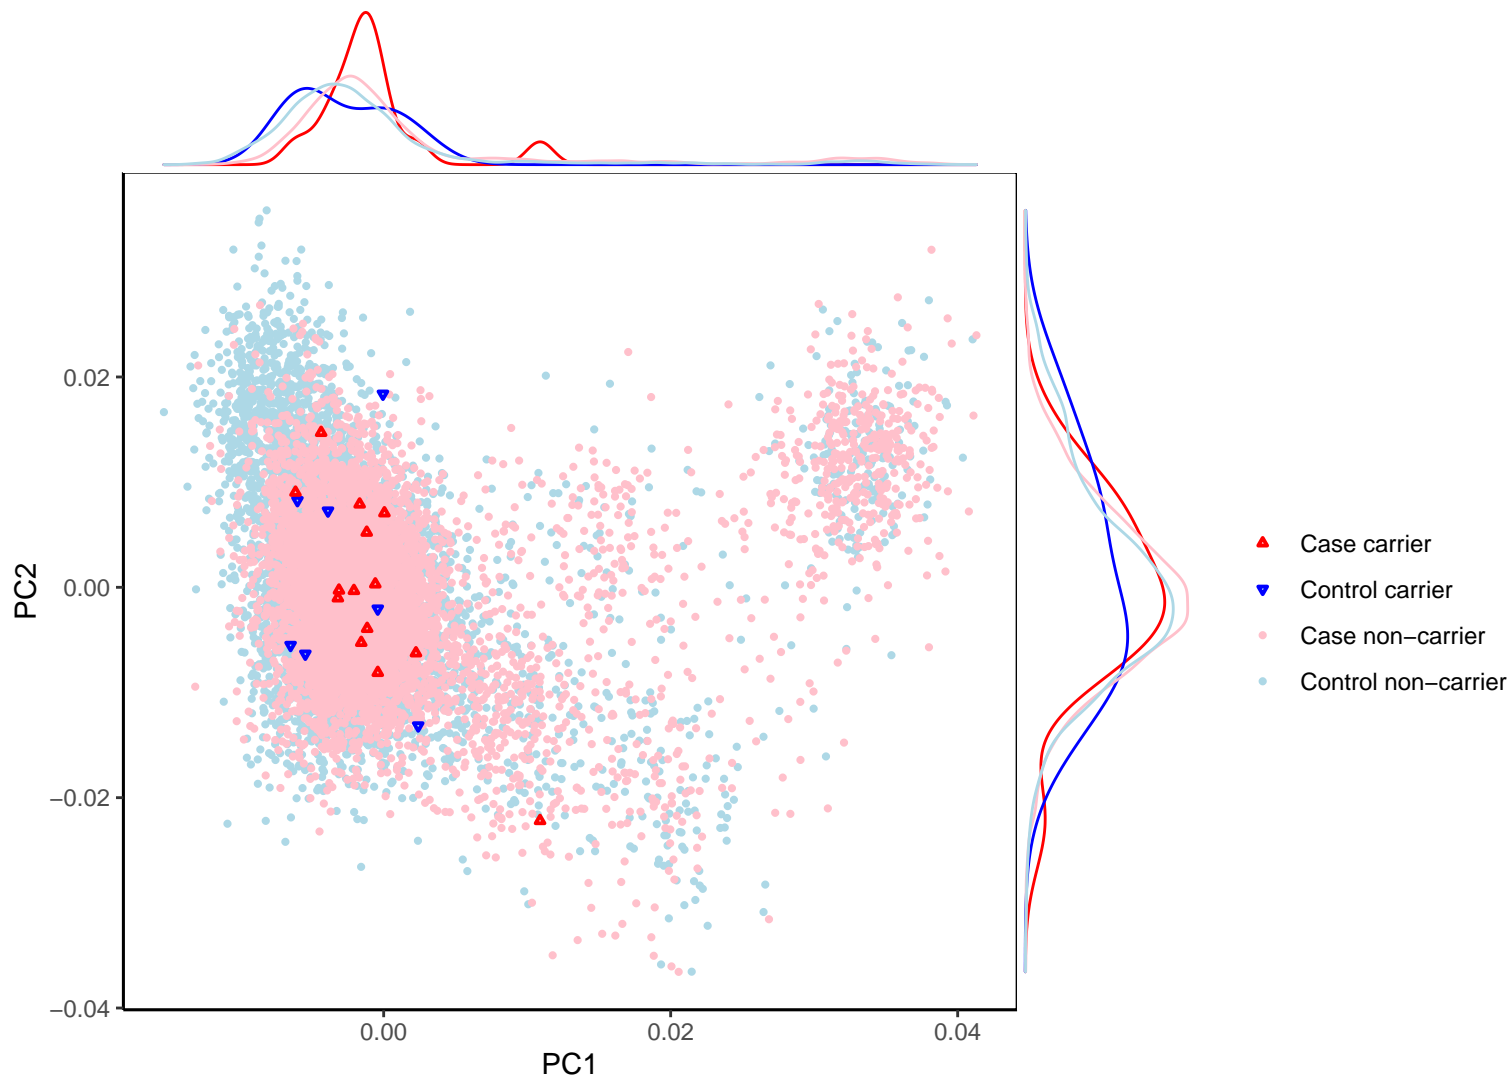

TWIST chr16.50716671\_G\_GT

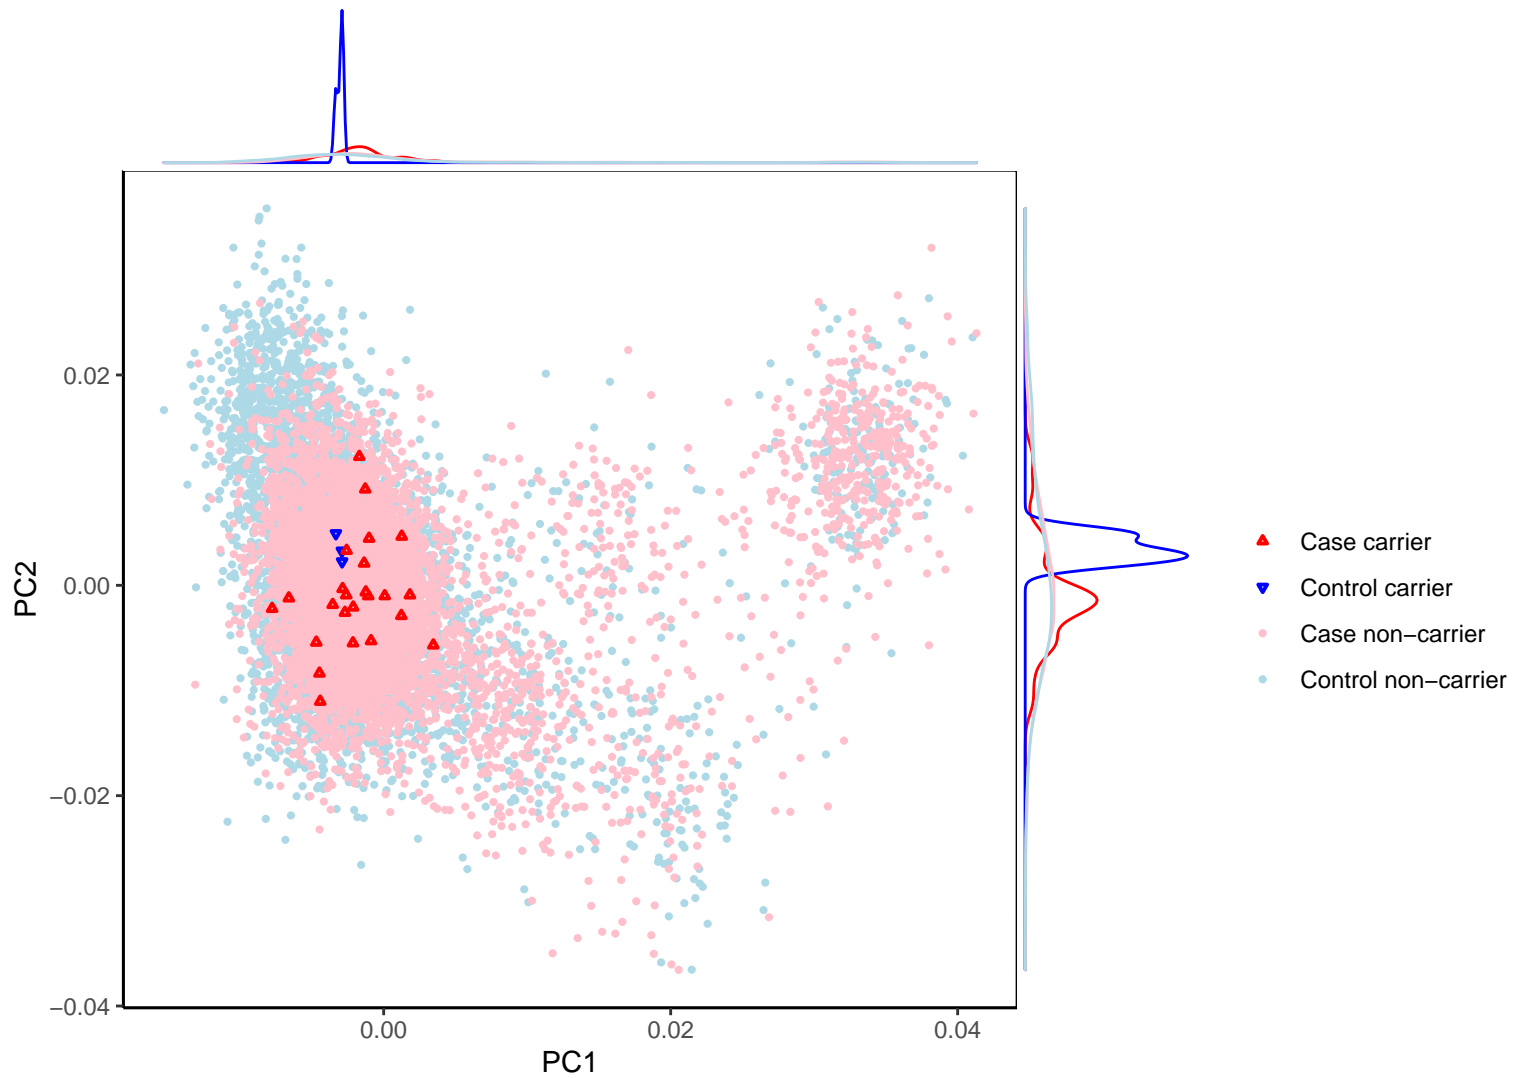

# TWIST chr16.50716899\_A\_G

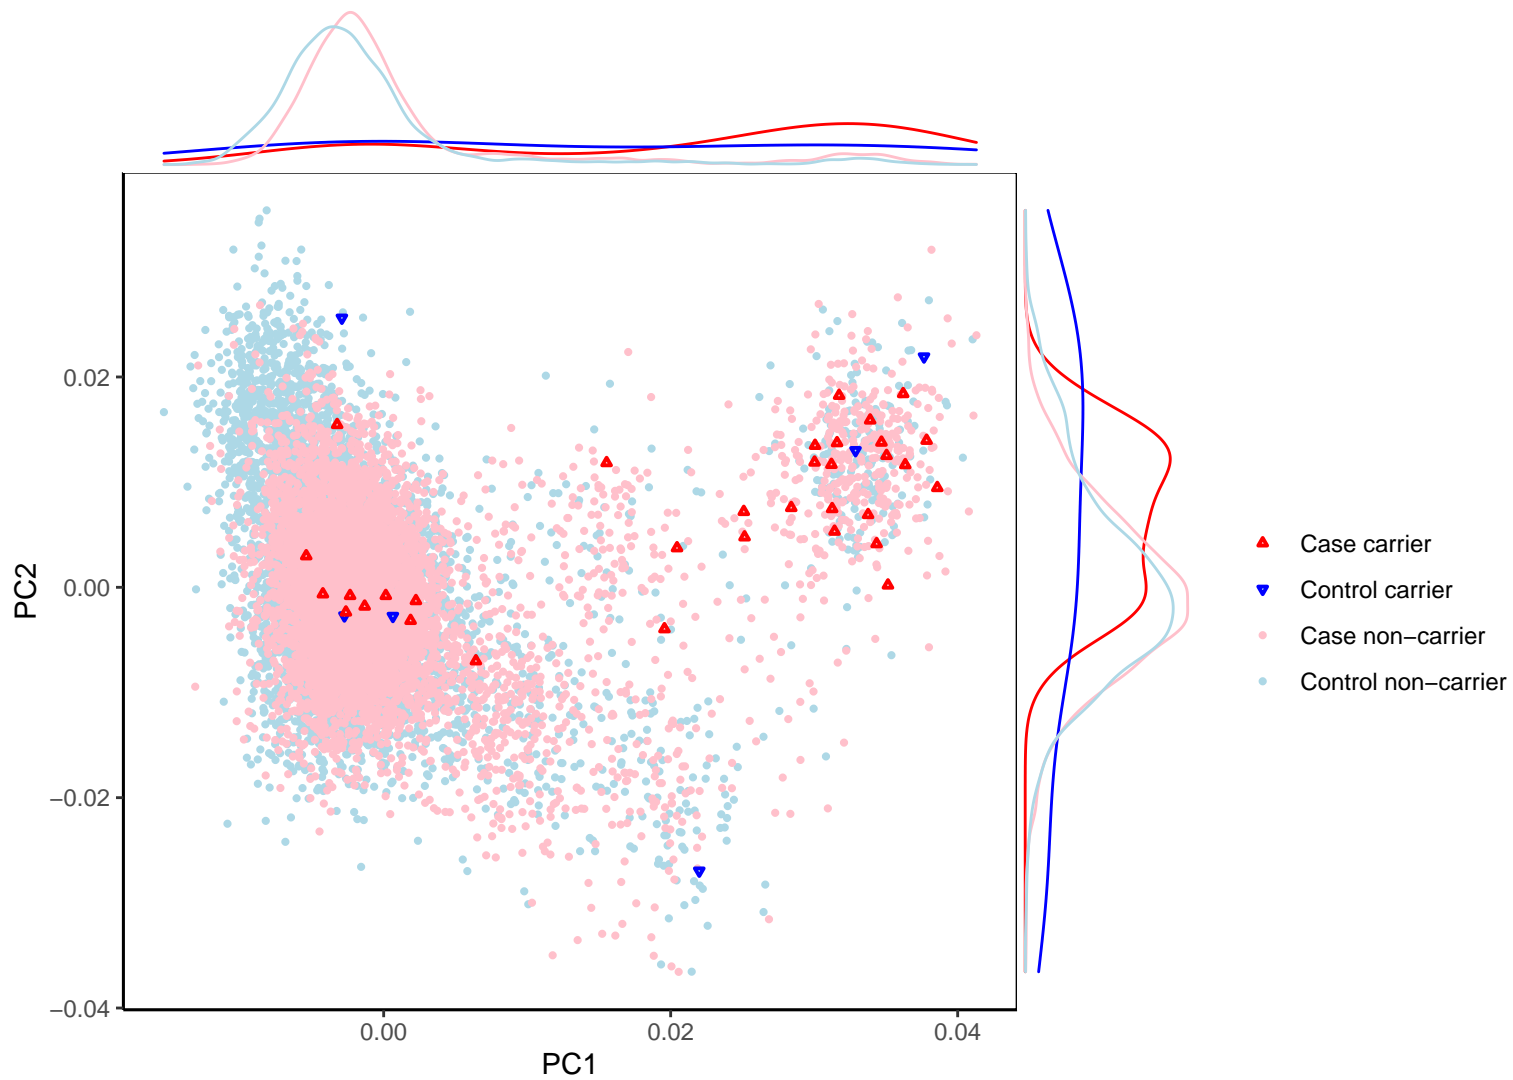

# TWIST chr16.50716931\_A\_G

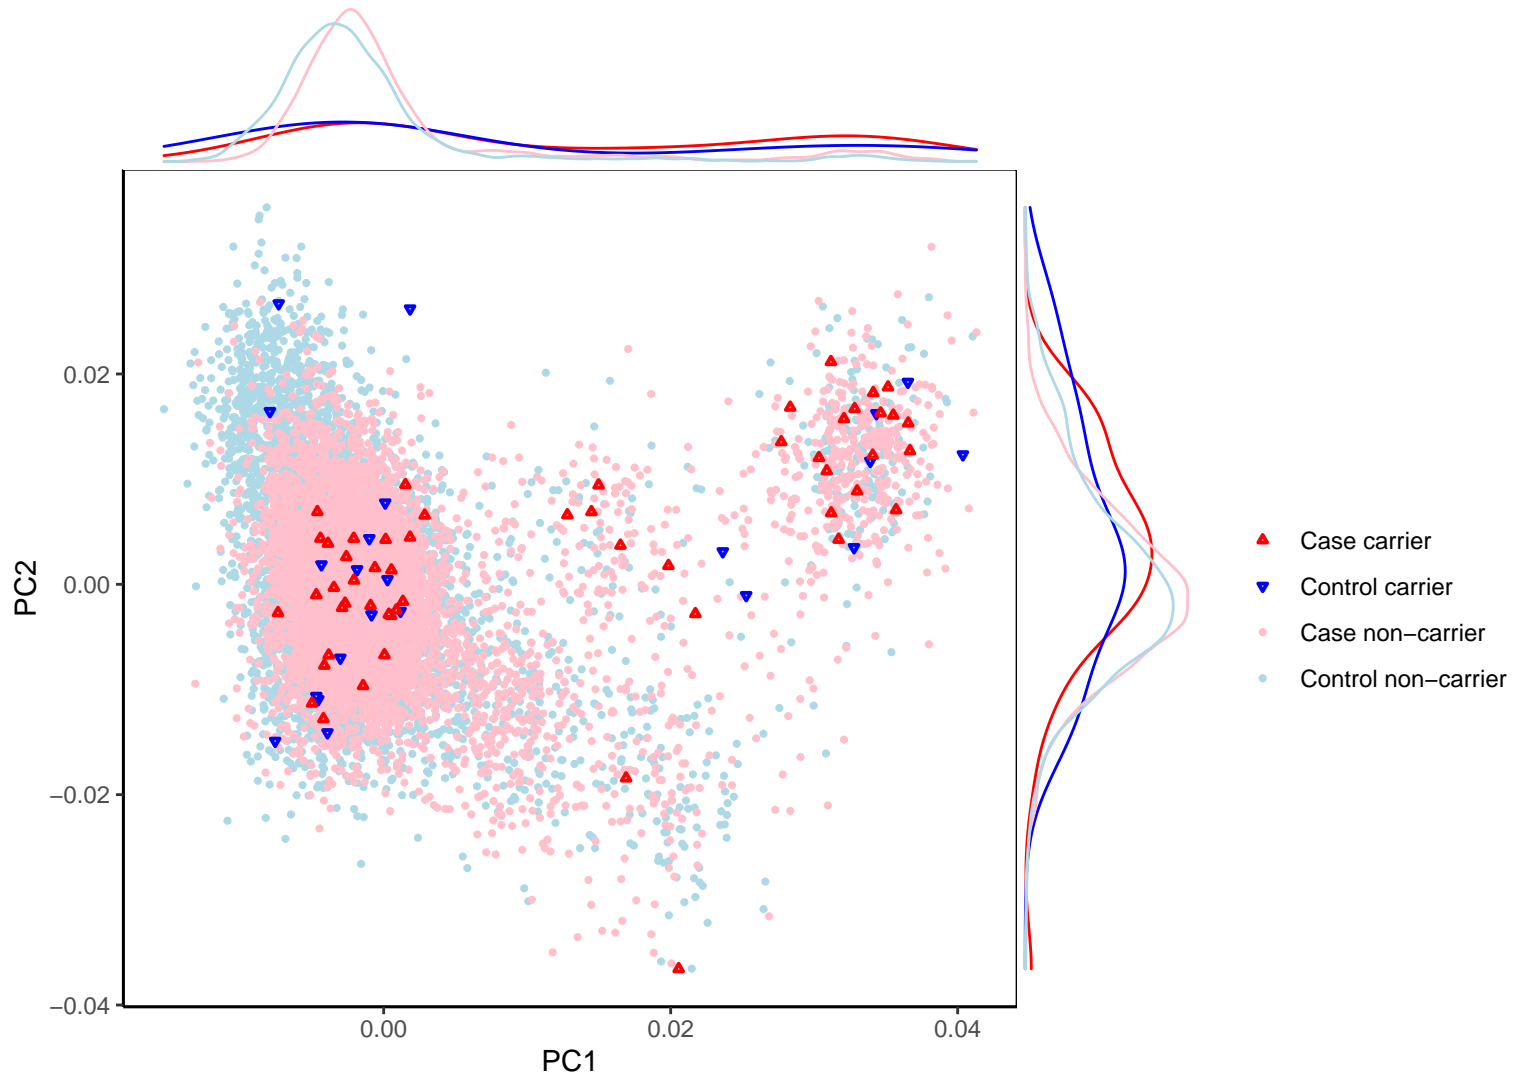

# TWIST chr16.50722629\_G\_C

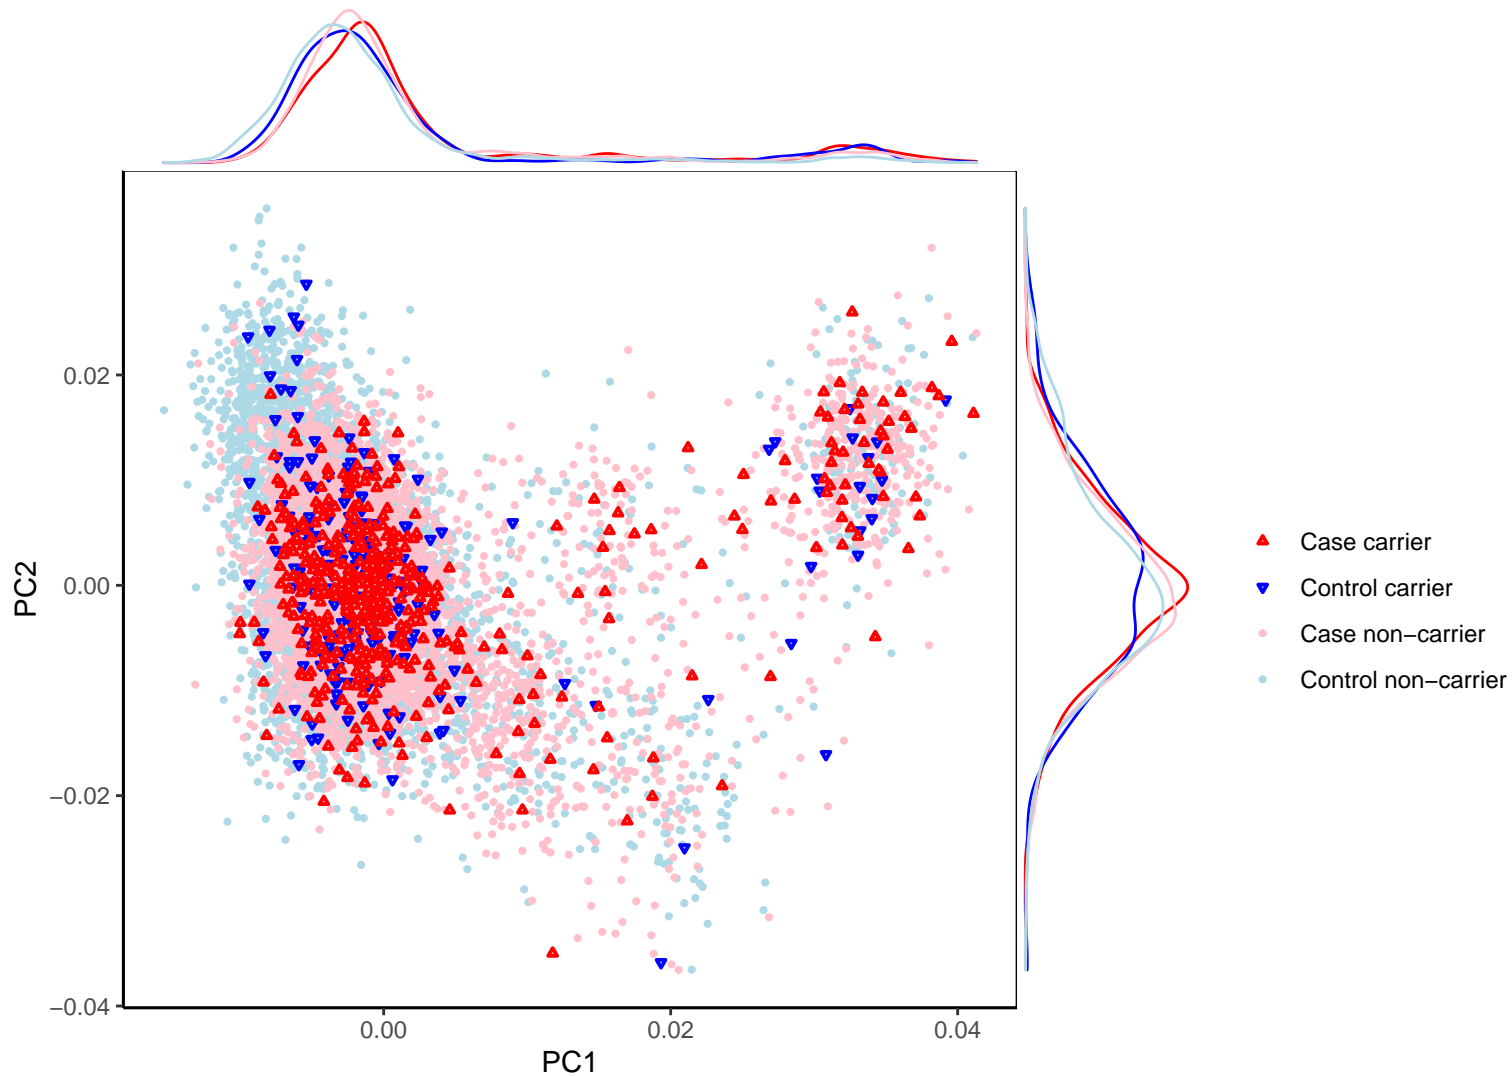

TWIST chr16.50723365\_G\_A

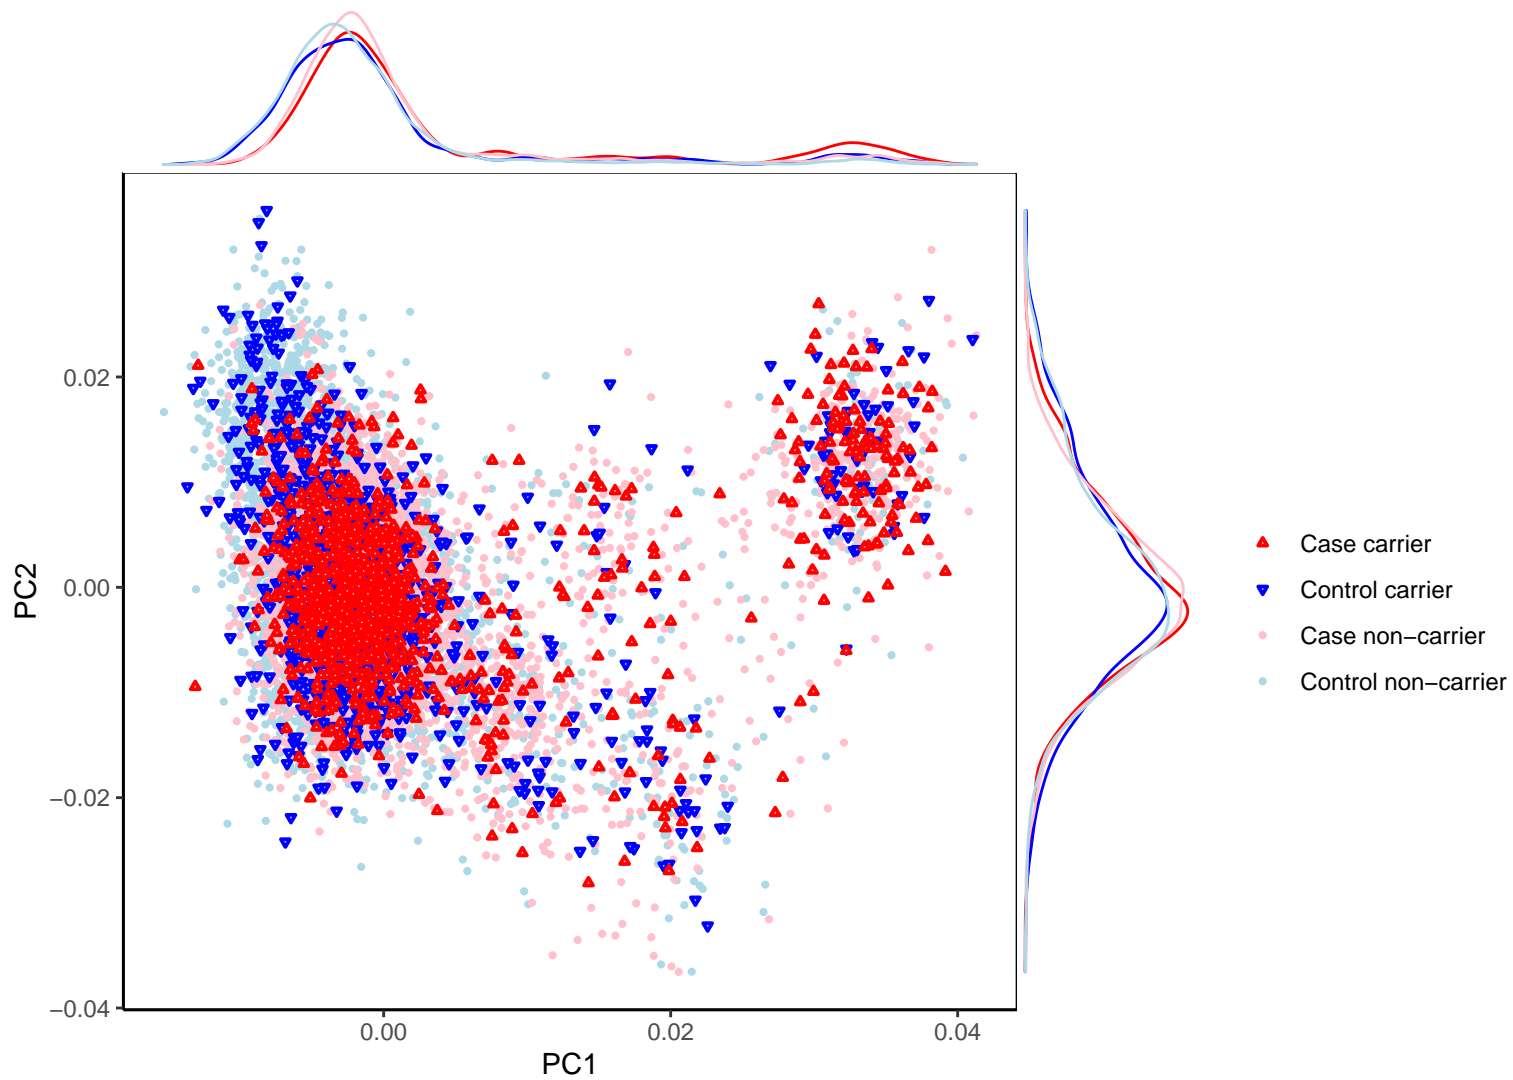

# TWIST chr16.50729867\_G\_GC

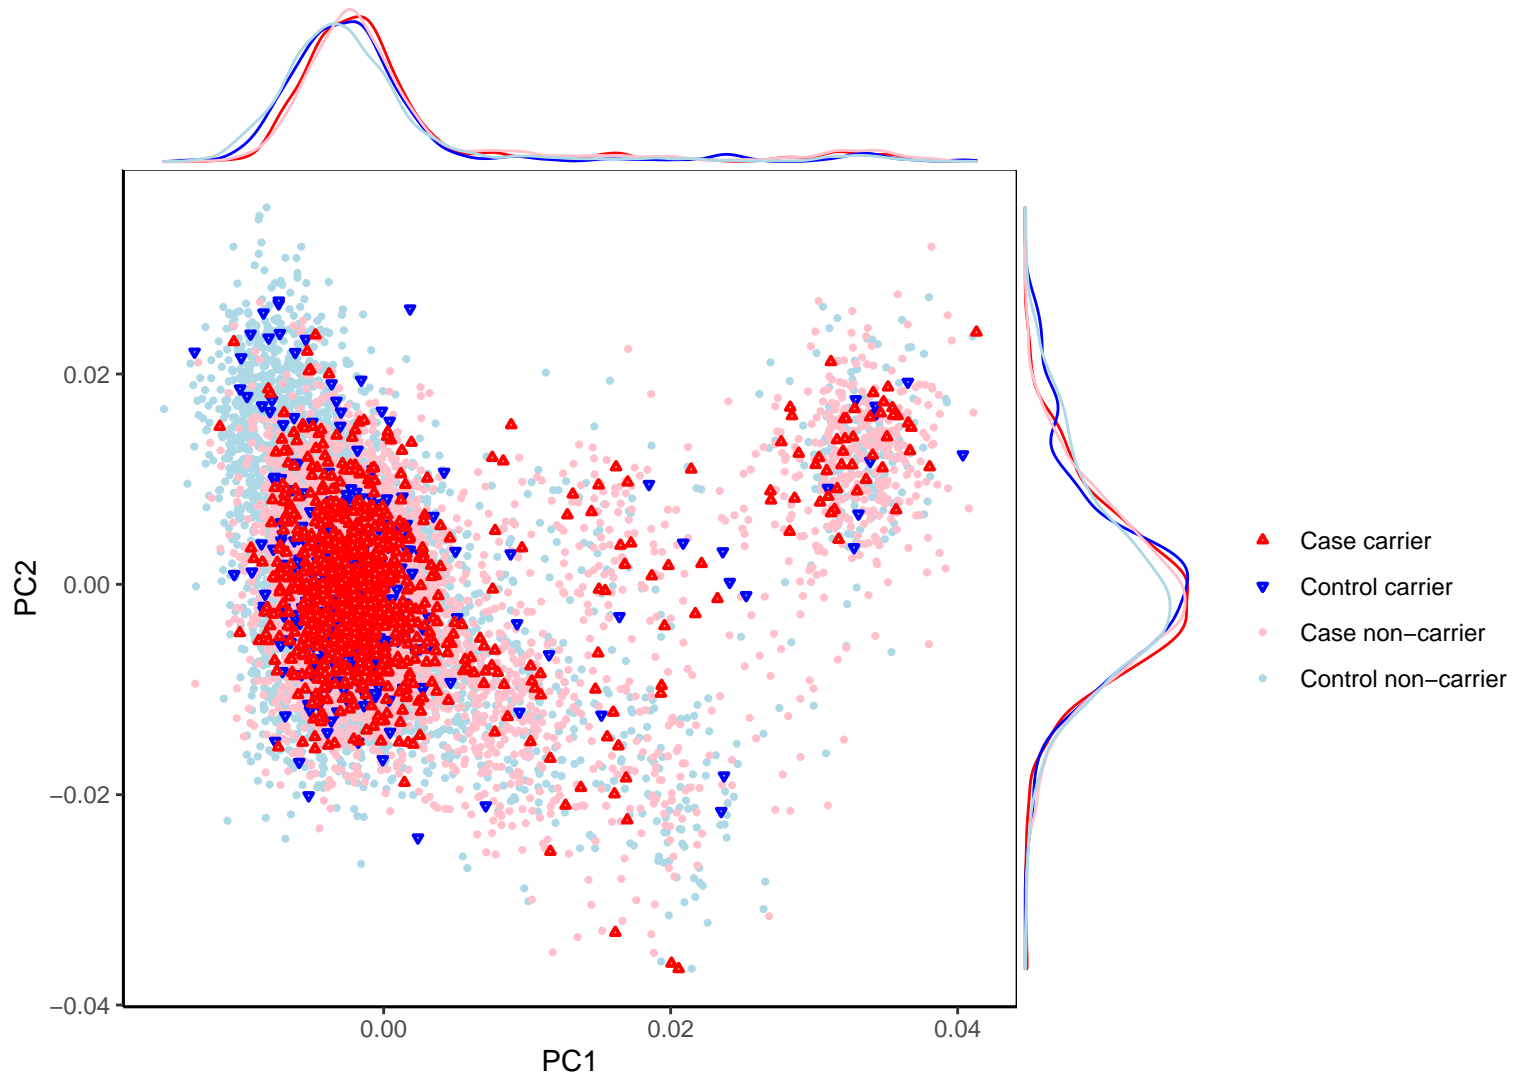



# TWIST chr16.50793607\_C\_T

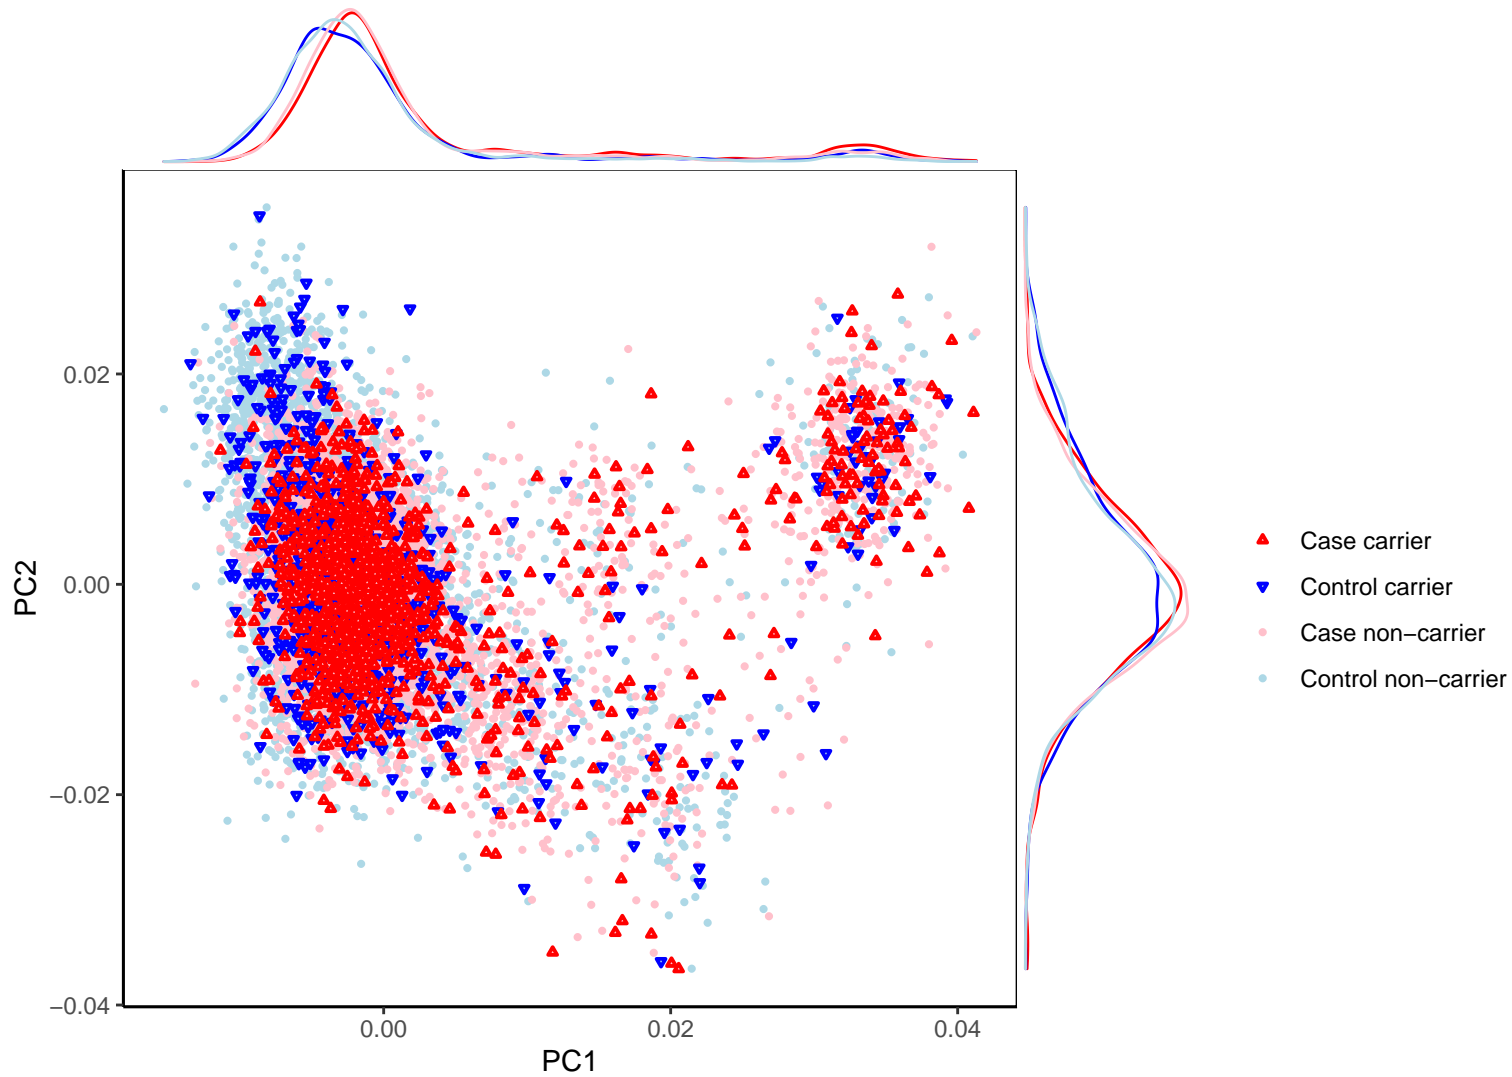

TWIST chr17.40558934\_T\_C

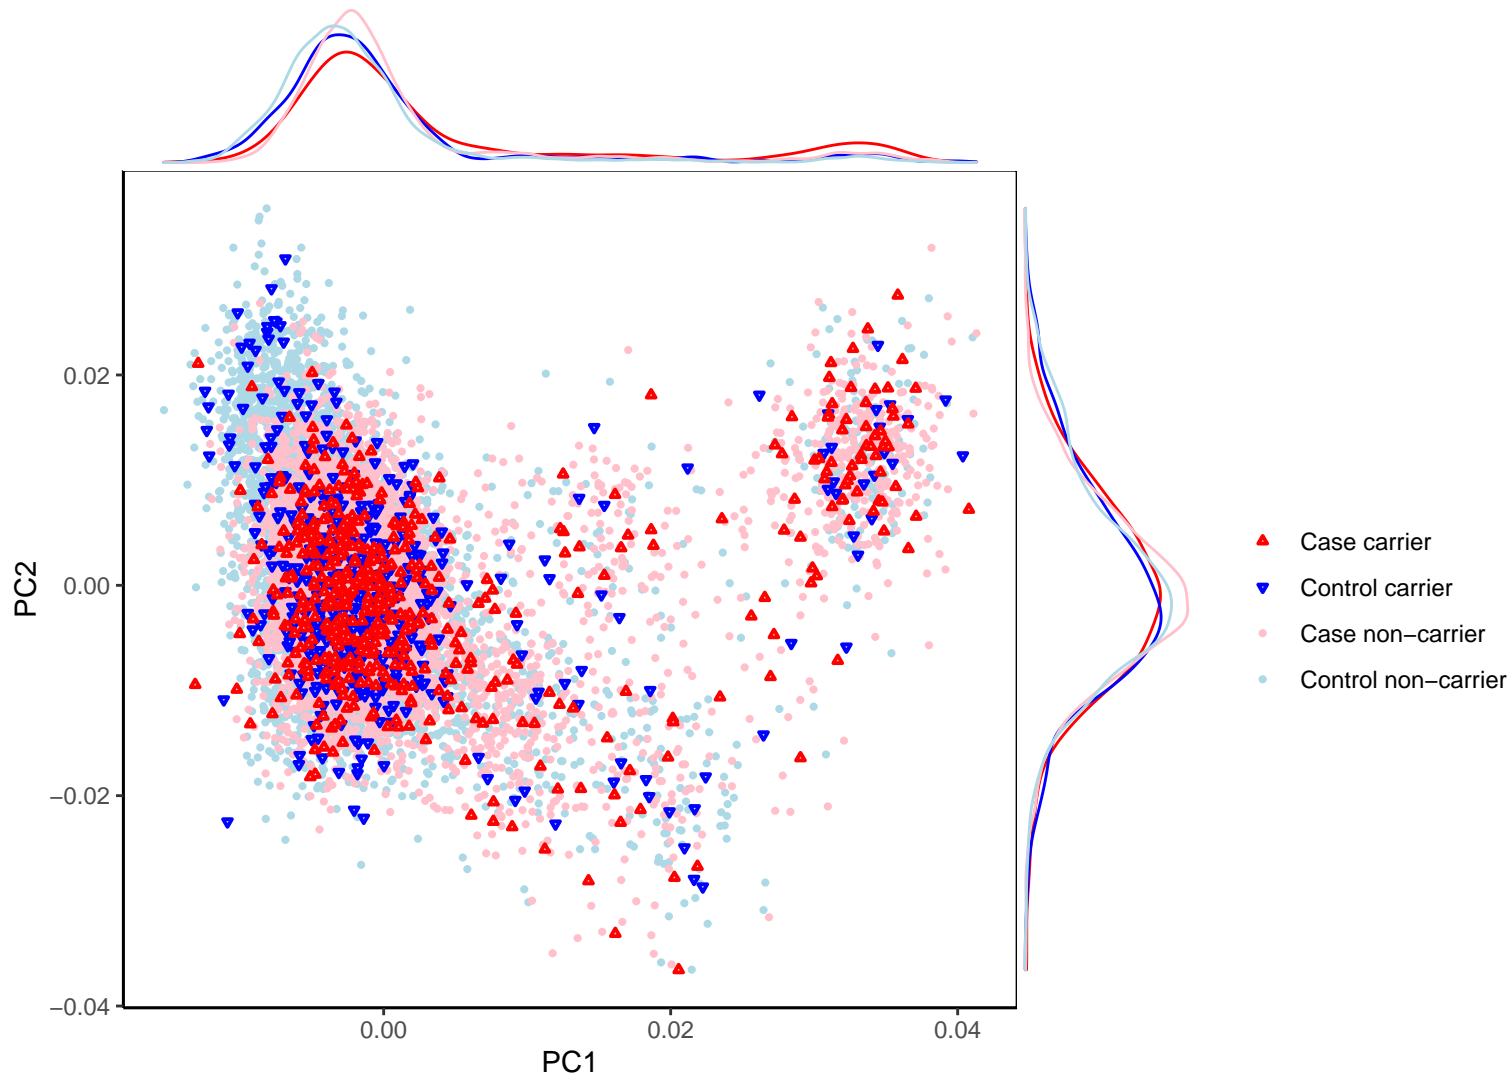

TWIST chr19.10352442\_G\_C

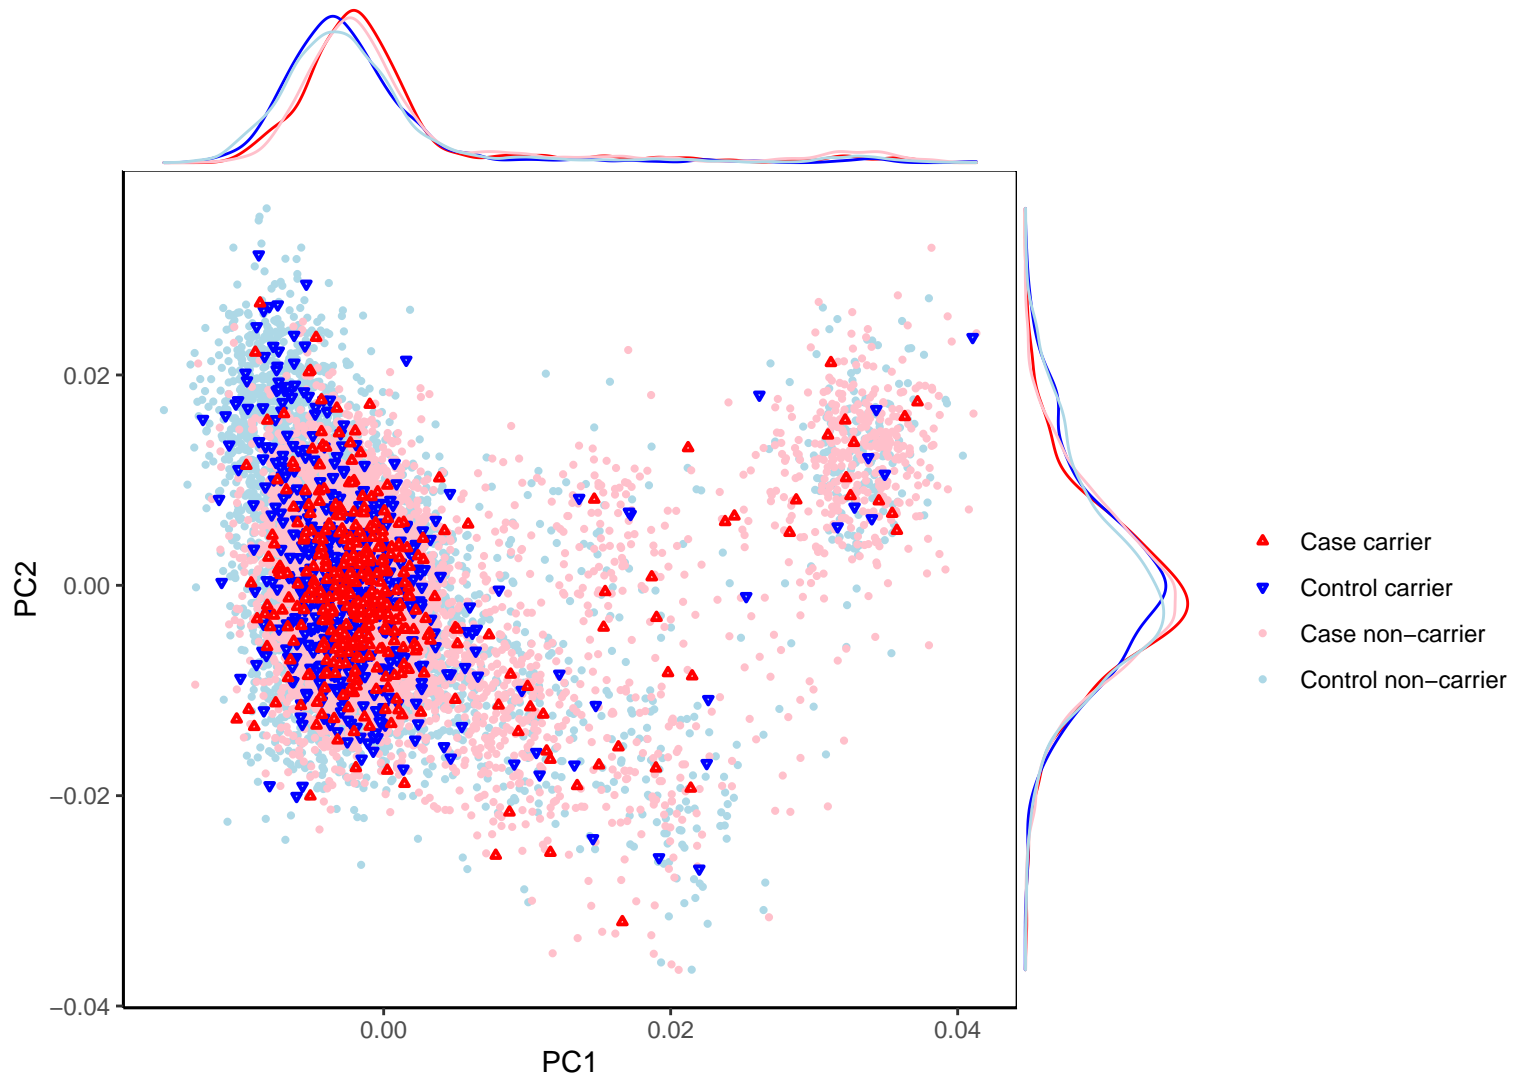

TWIST chr19.10354167\_G\_A

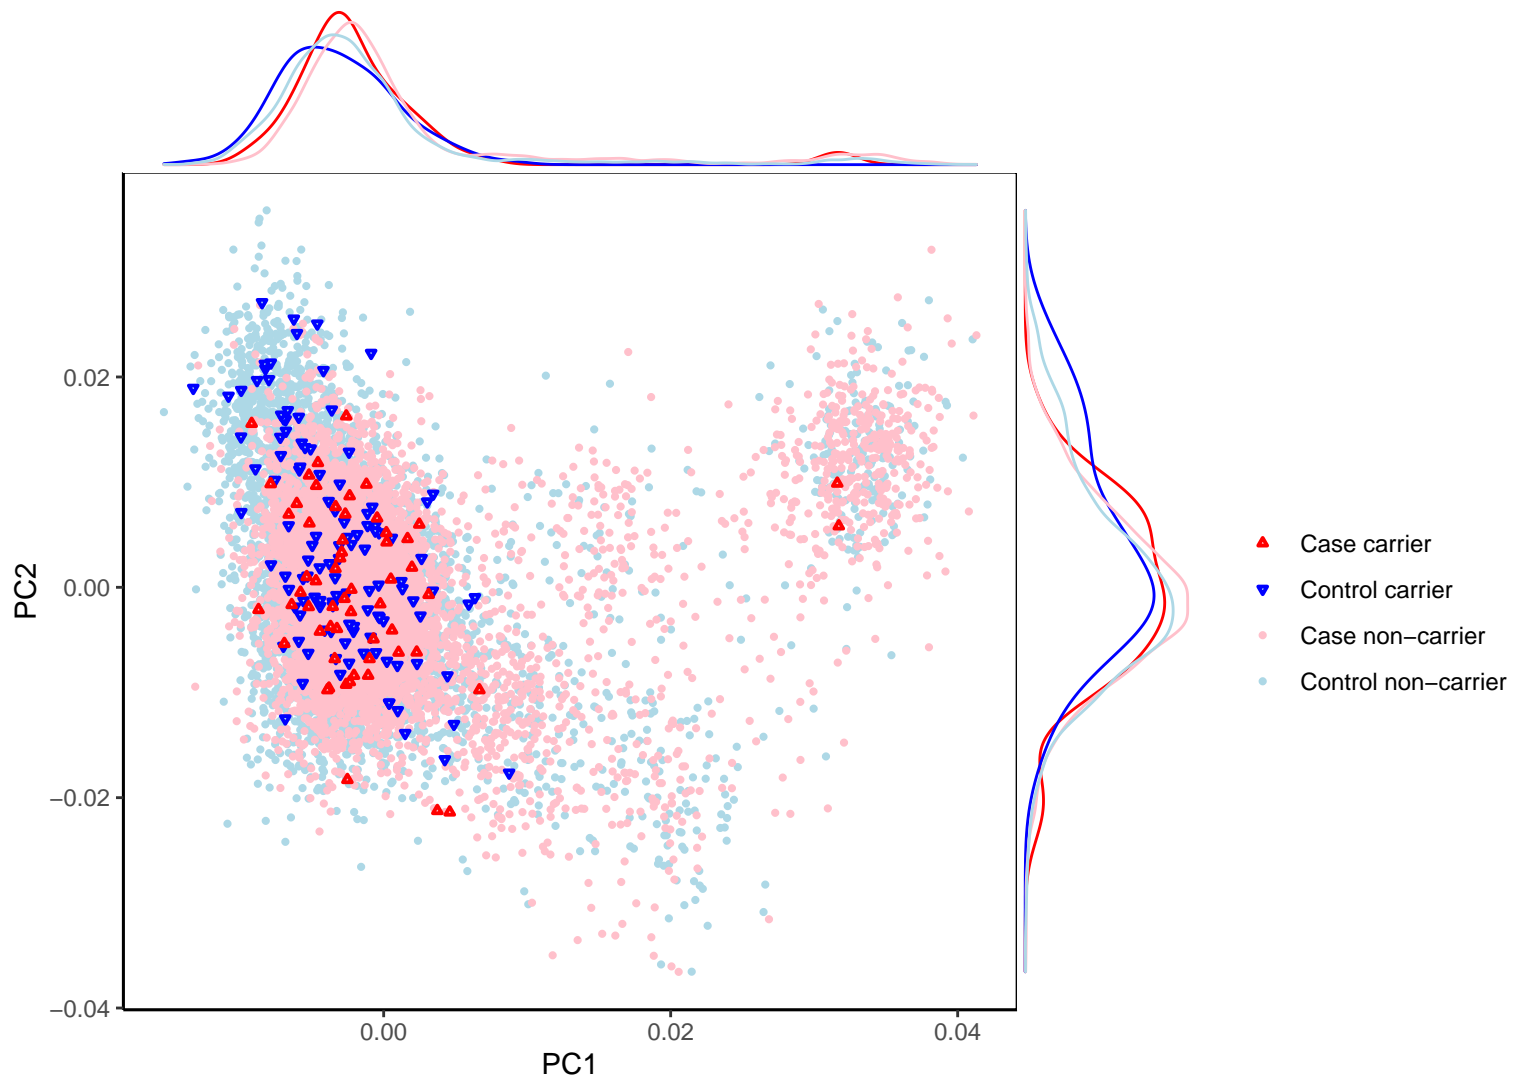

# TWIST chr1.28150681\_T\_C

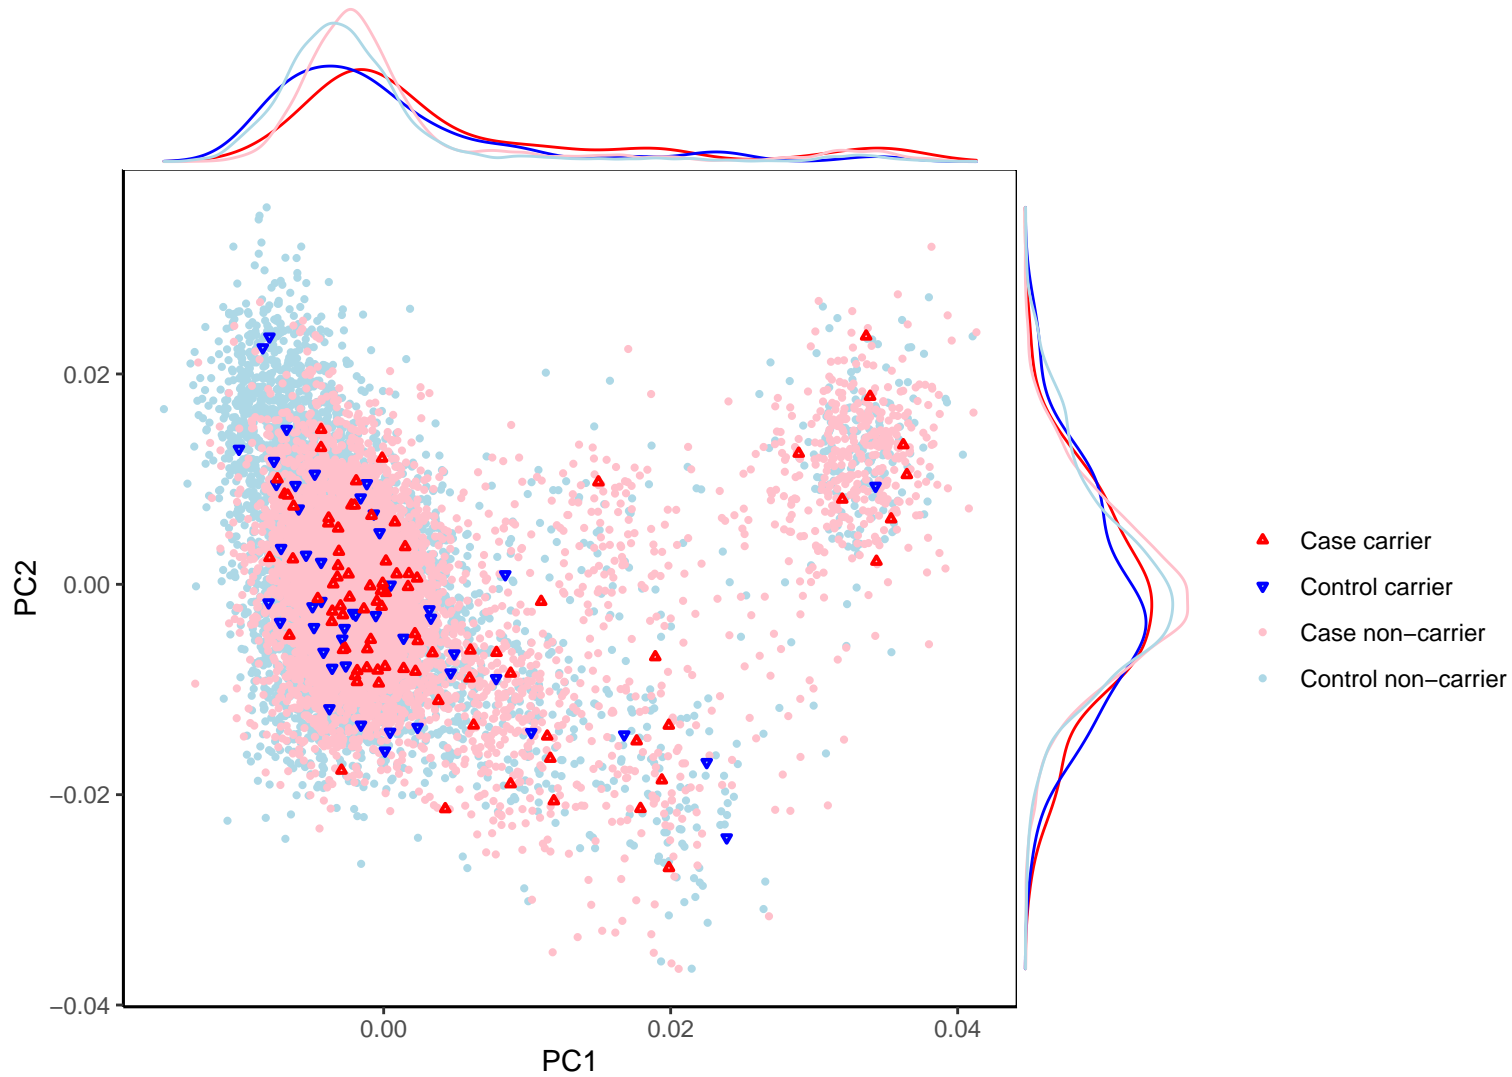

TWIST chr1.67206980\_T\_C

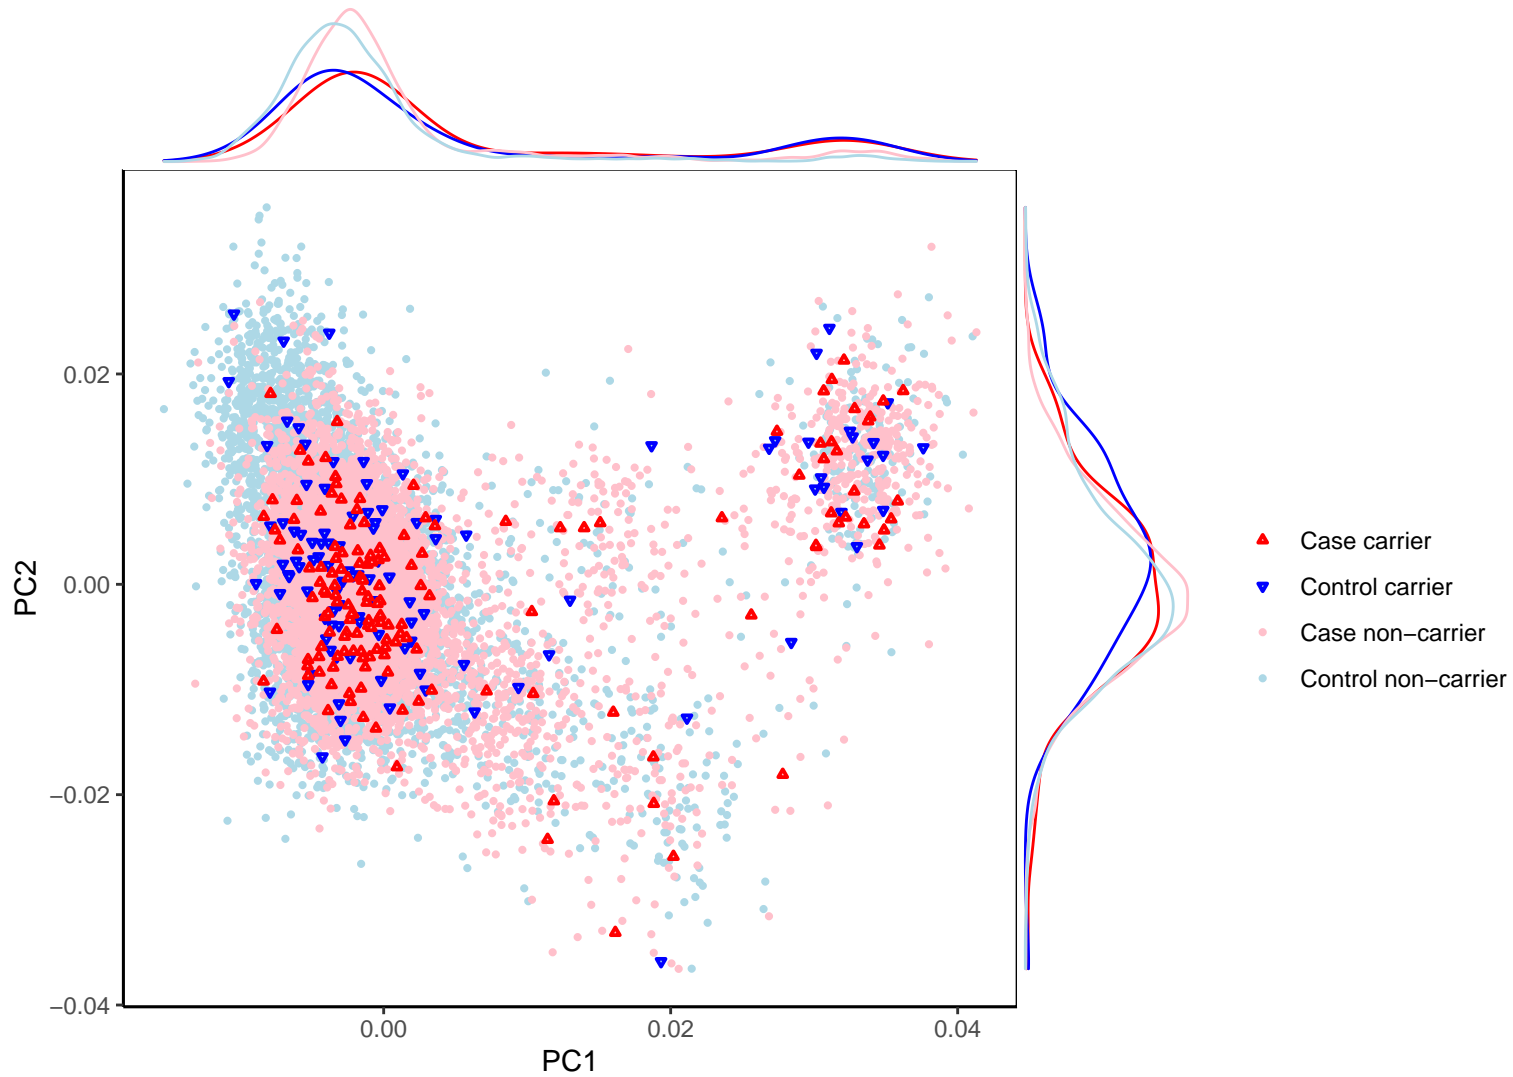

# TWIST chr1.67240217\_G\_A

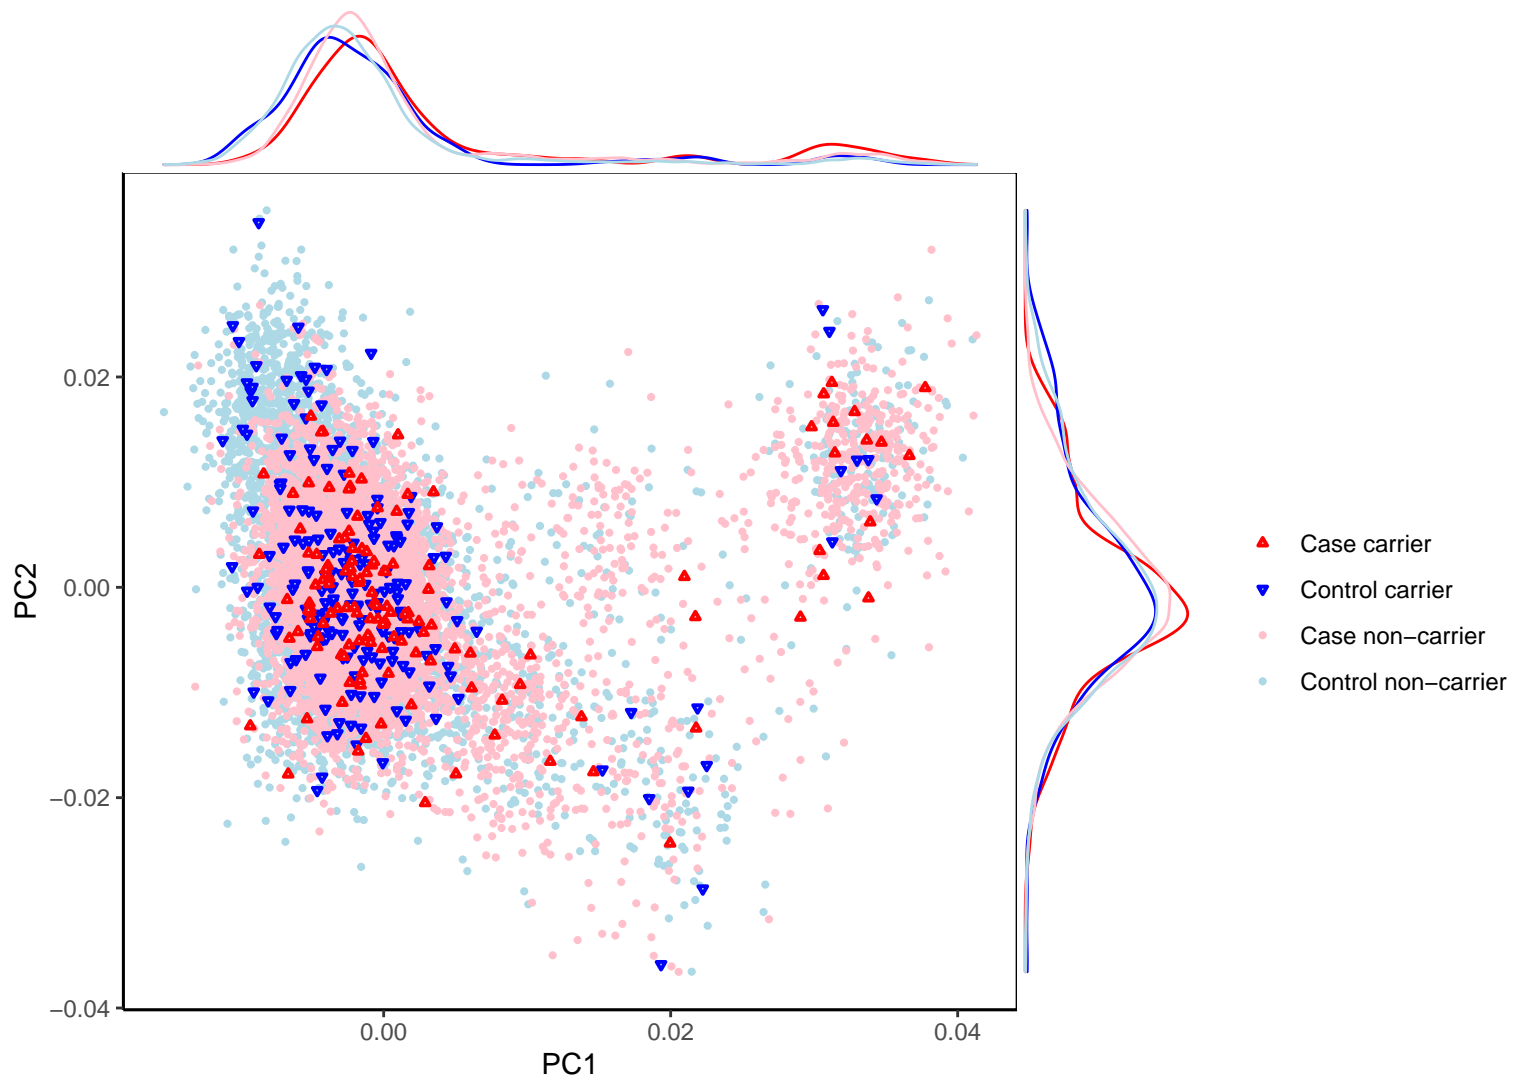

TWIST chr1.67240275\_G\_A

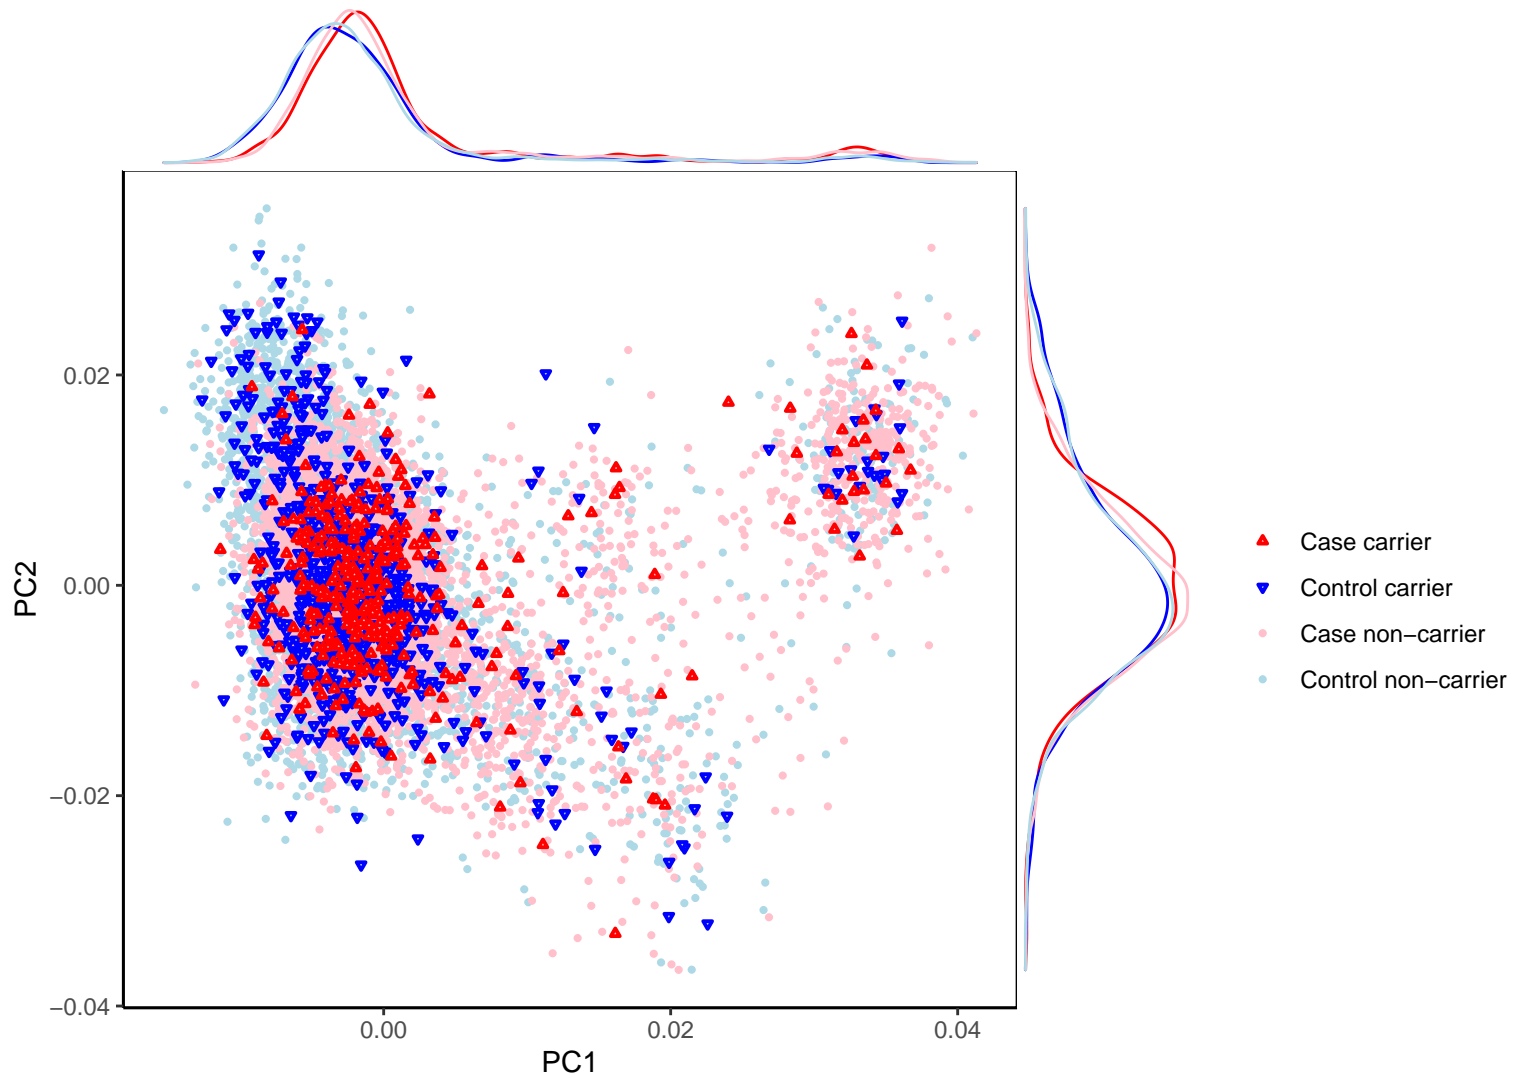



TWIST chr22.21643991\_G\_A

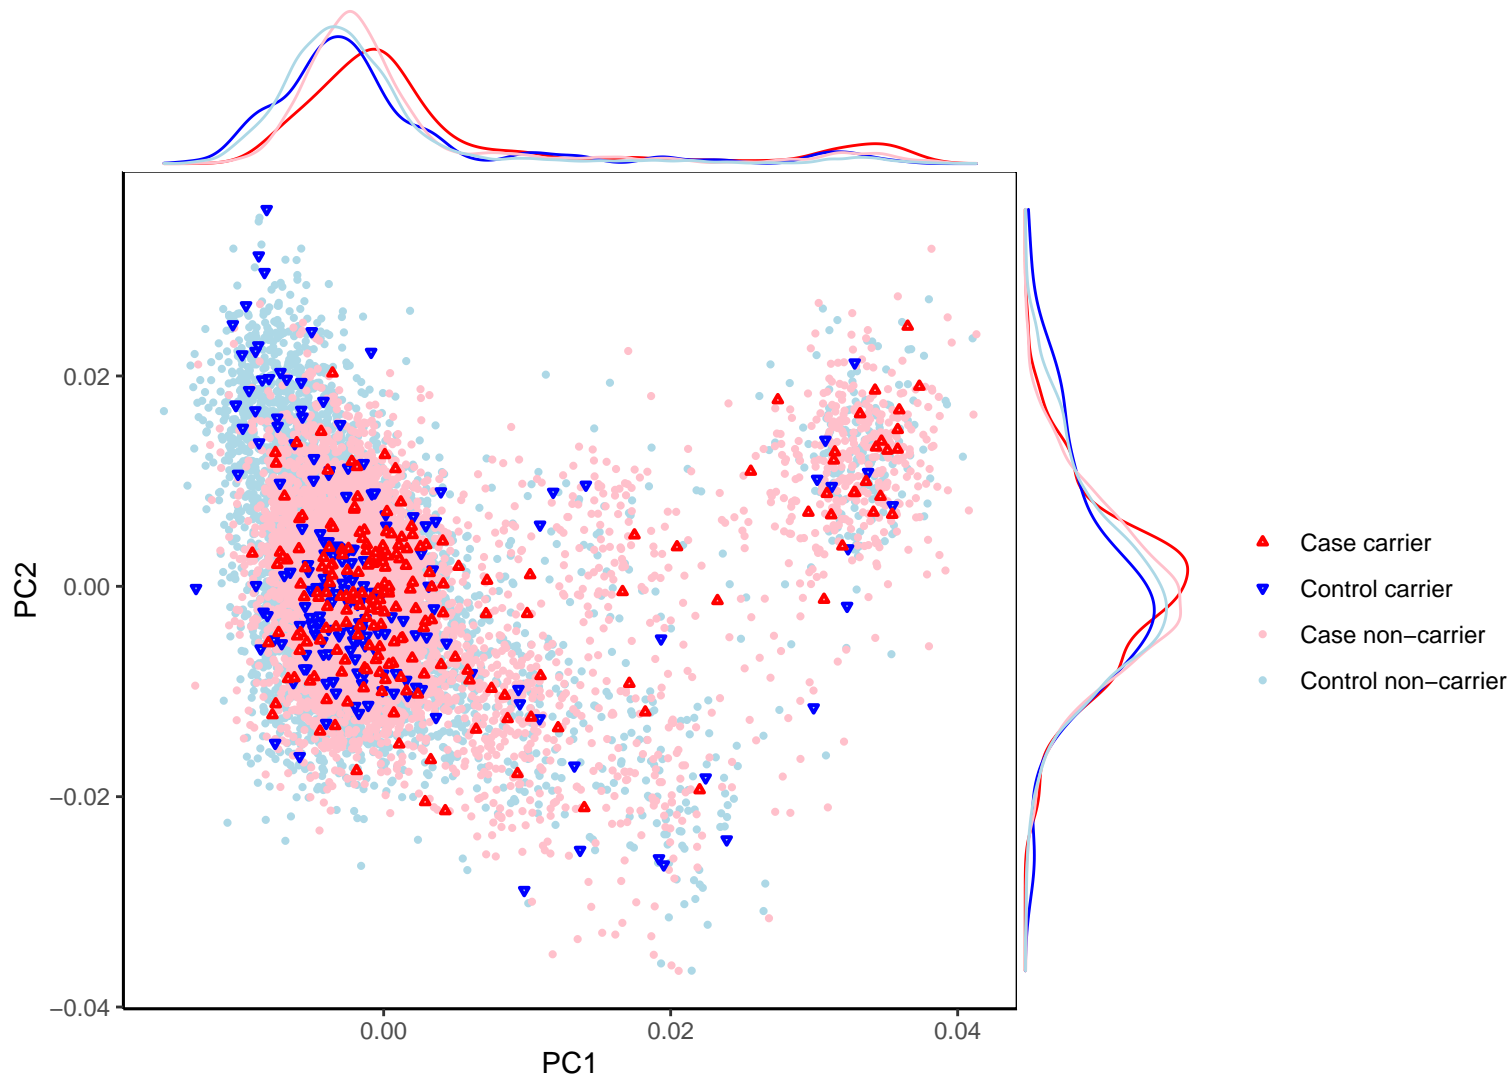

TWIST chr2.233263166\_A\_G

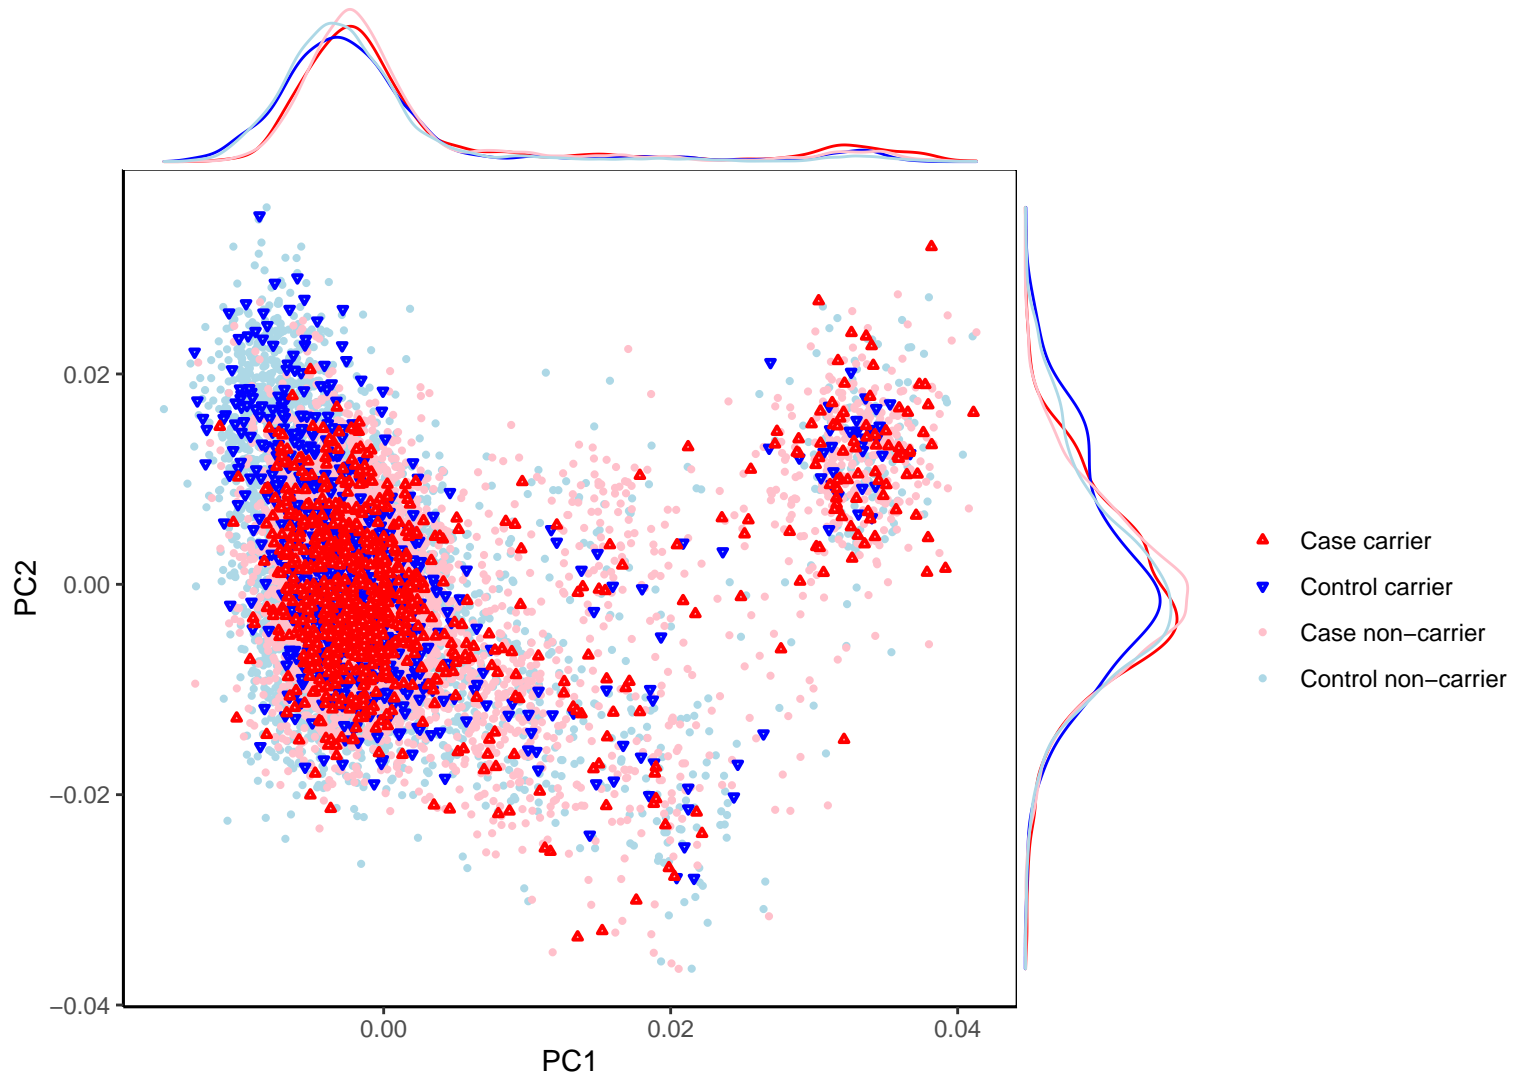

TWIST chr2.233320674\_A\_G

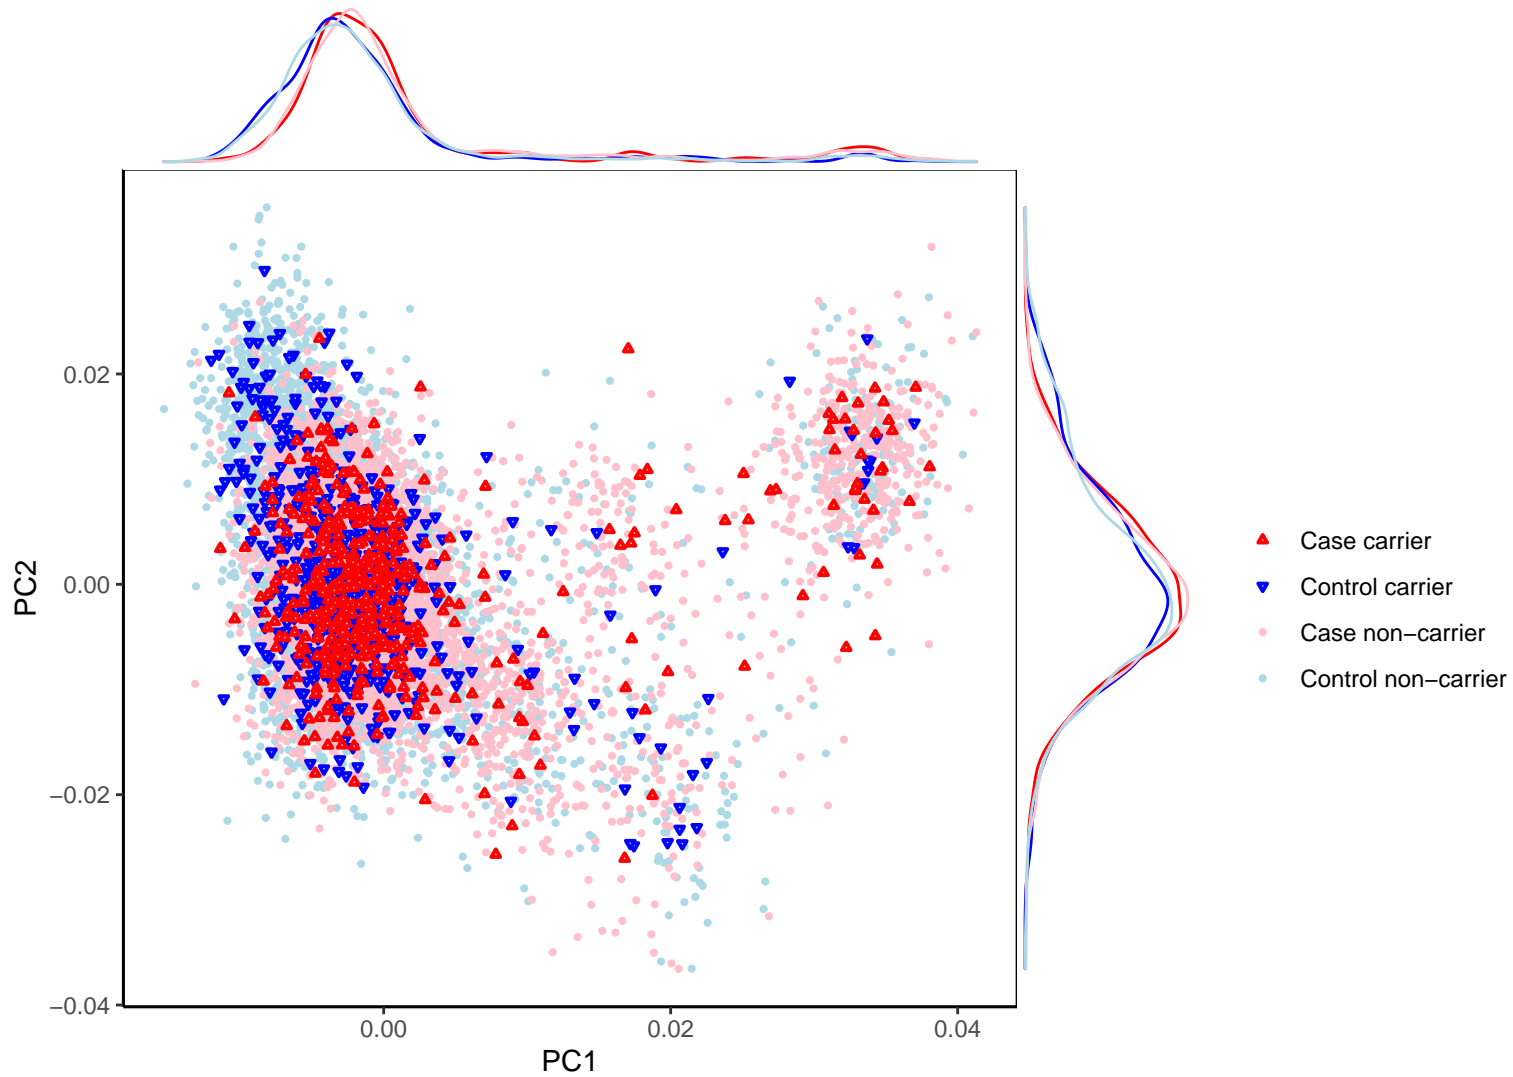

TWIST chr2.233527423\_C\_T

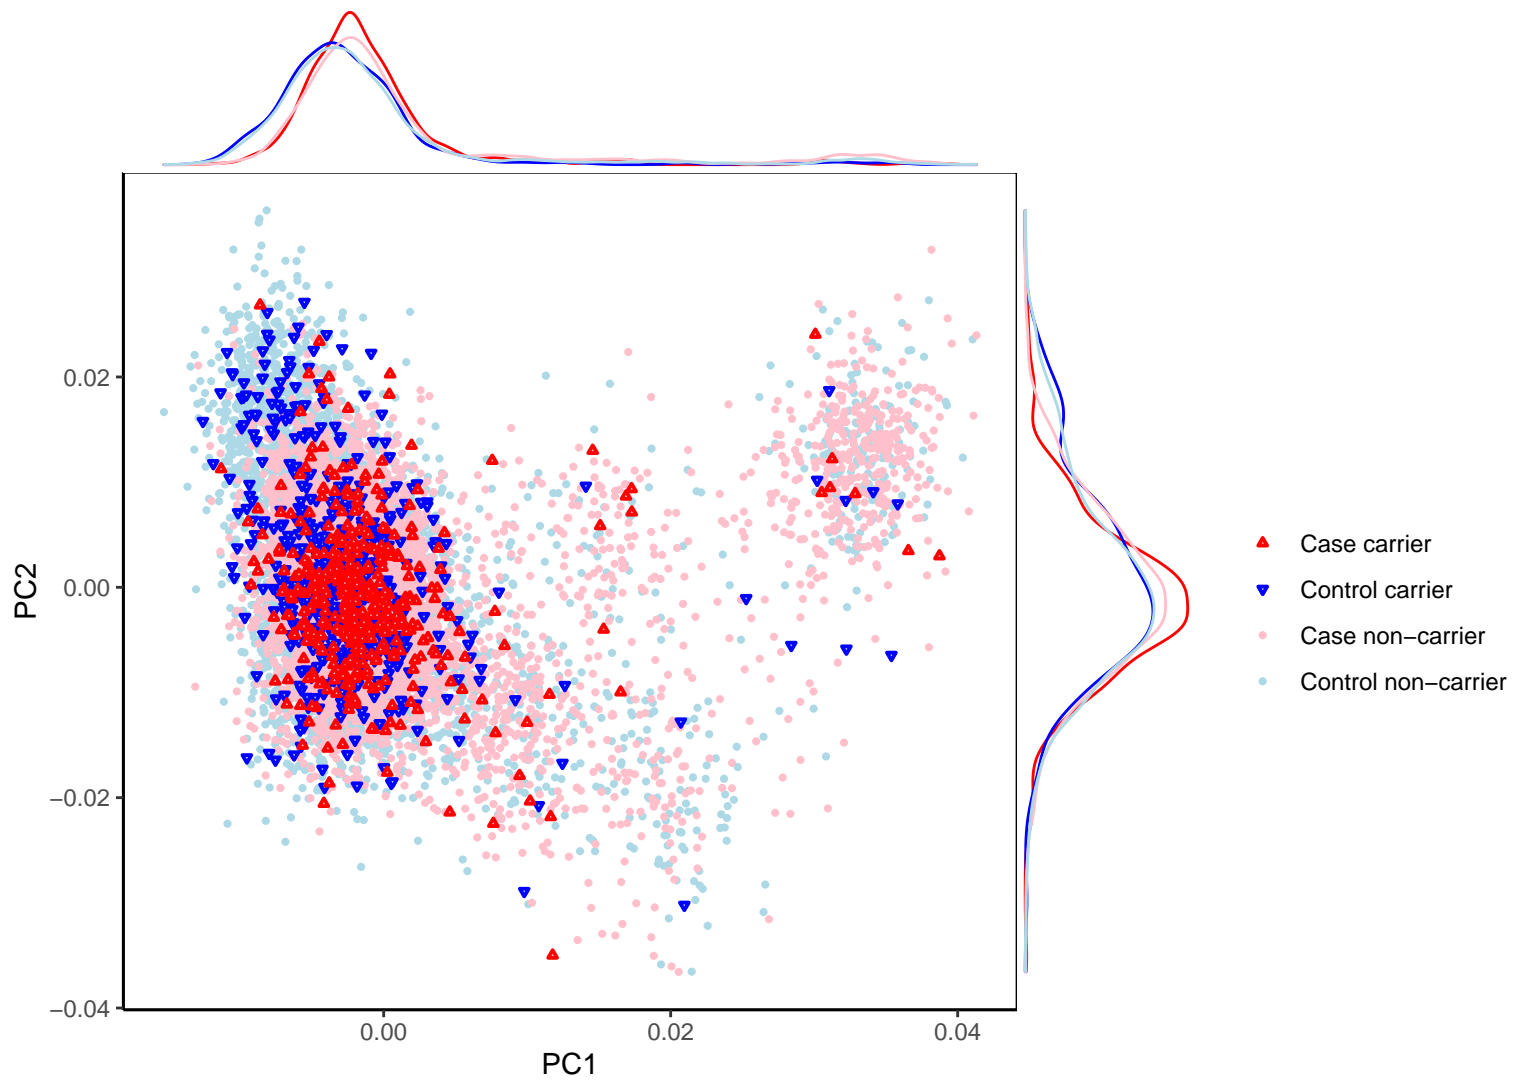

TWIST chr4.102267552\_C\_T

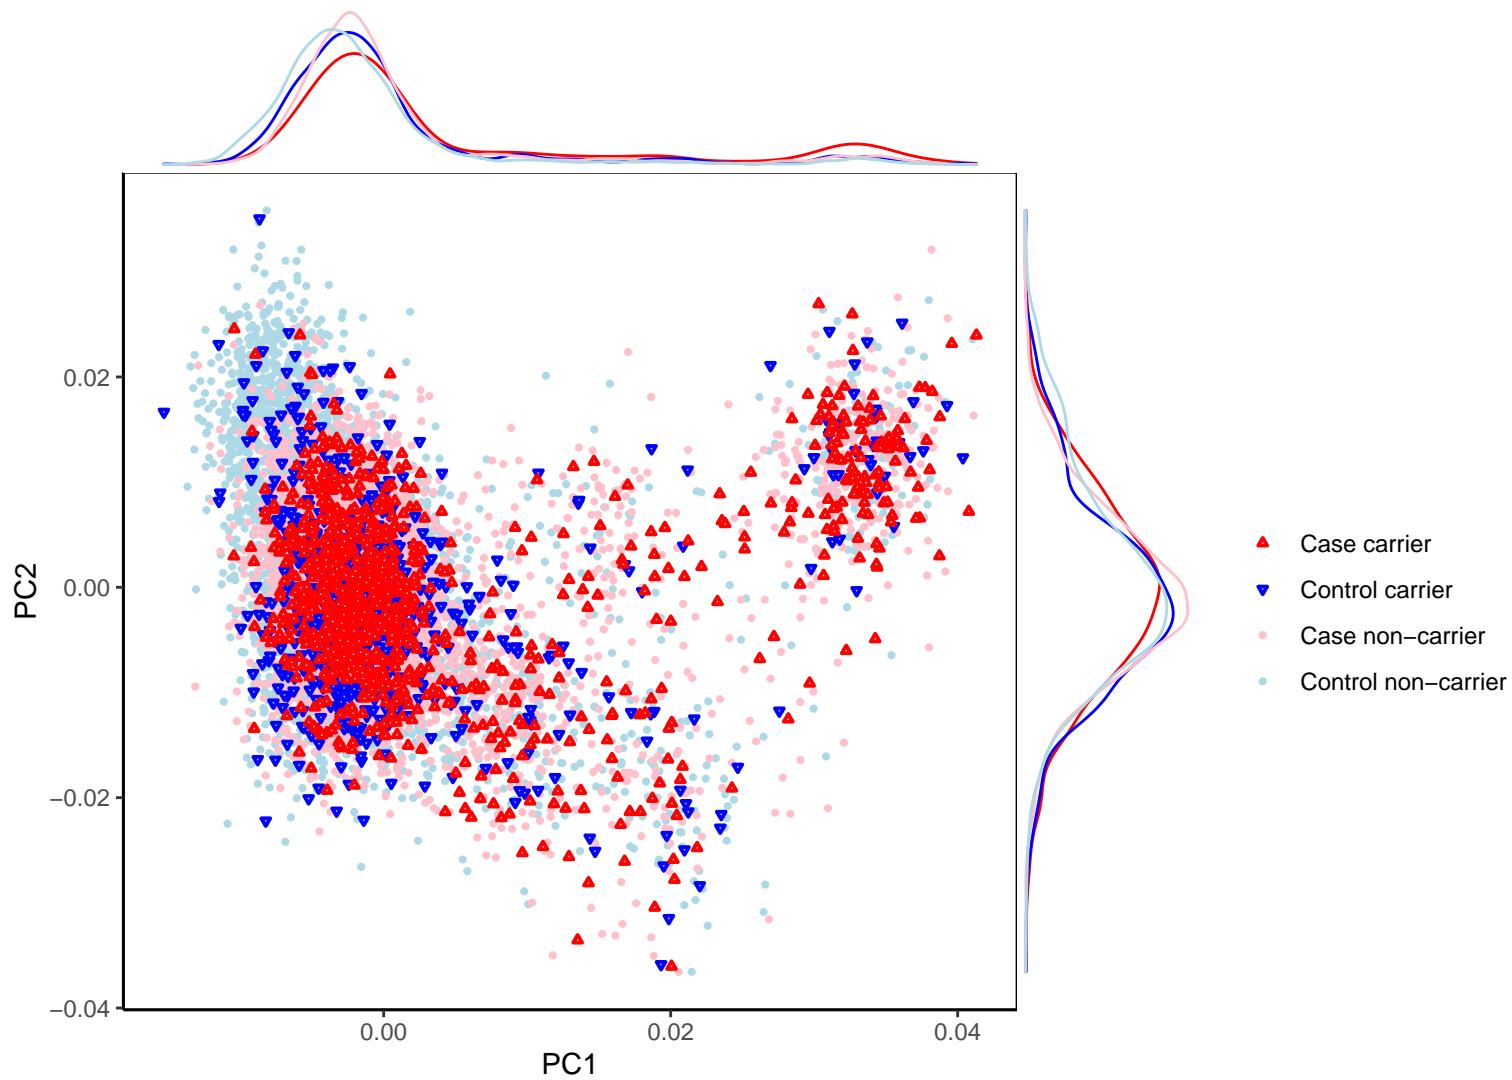

TWIST chr4.3447925\_G\_A

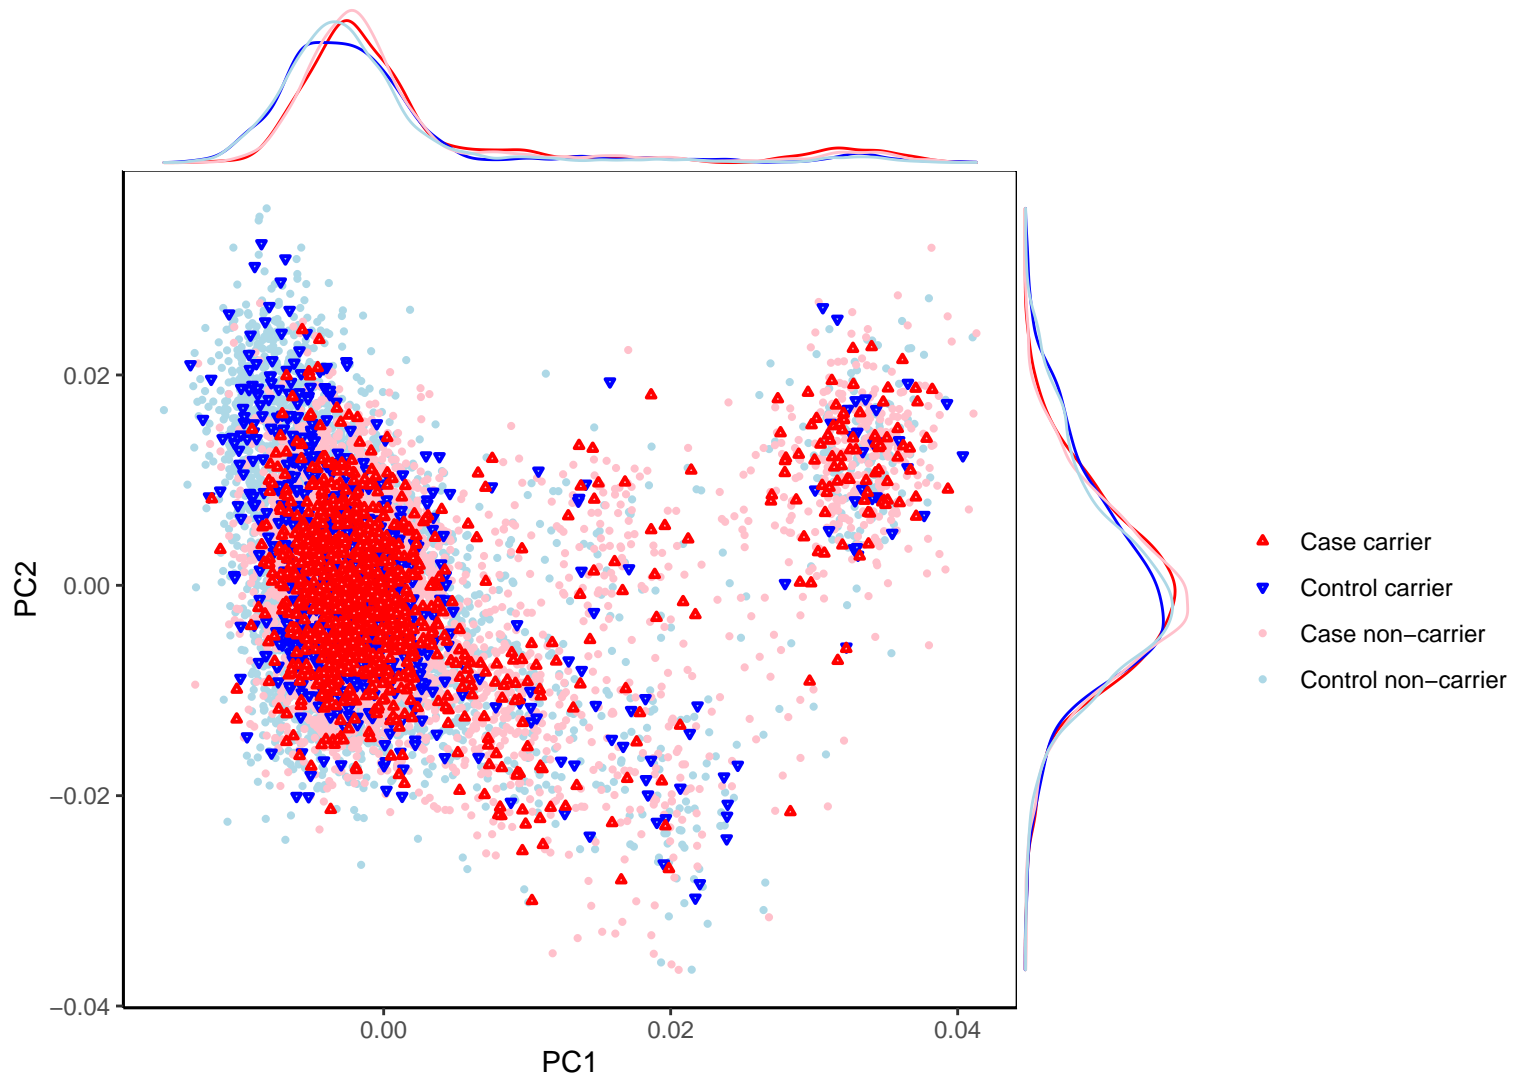

TWIST chr4.94573345\_C\_T

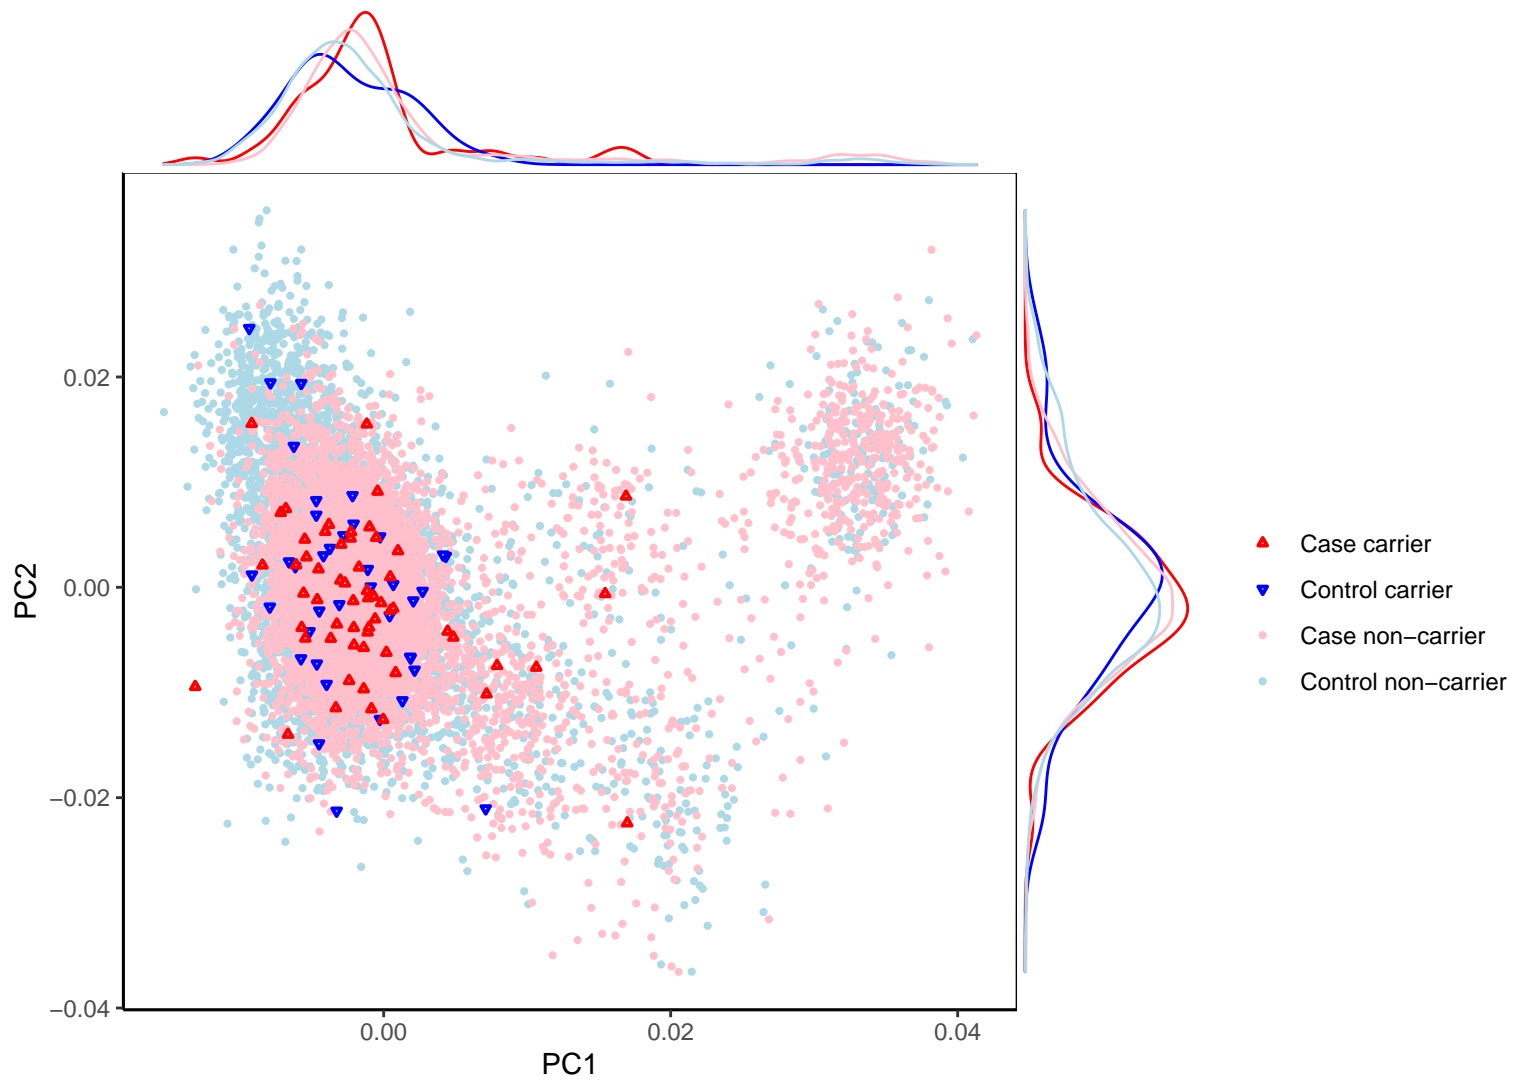

TWIST chr5.150848436\_C\_T

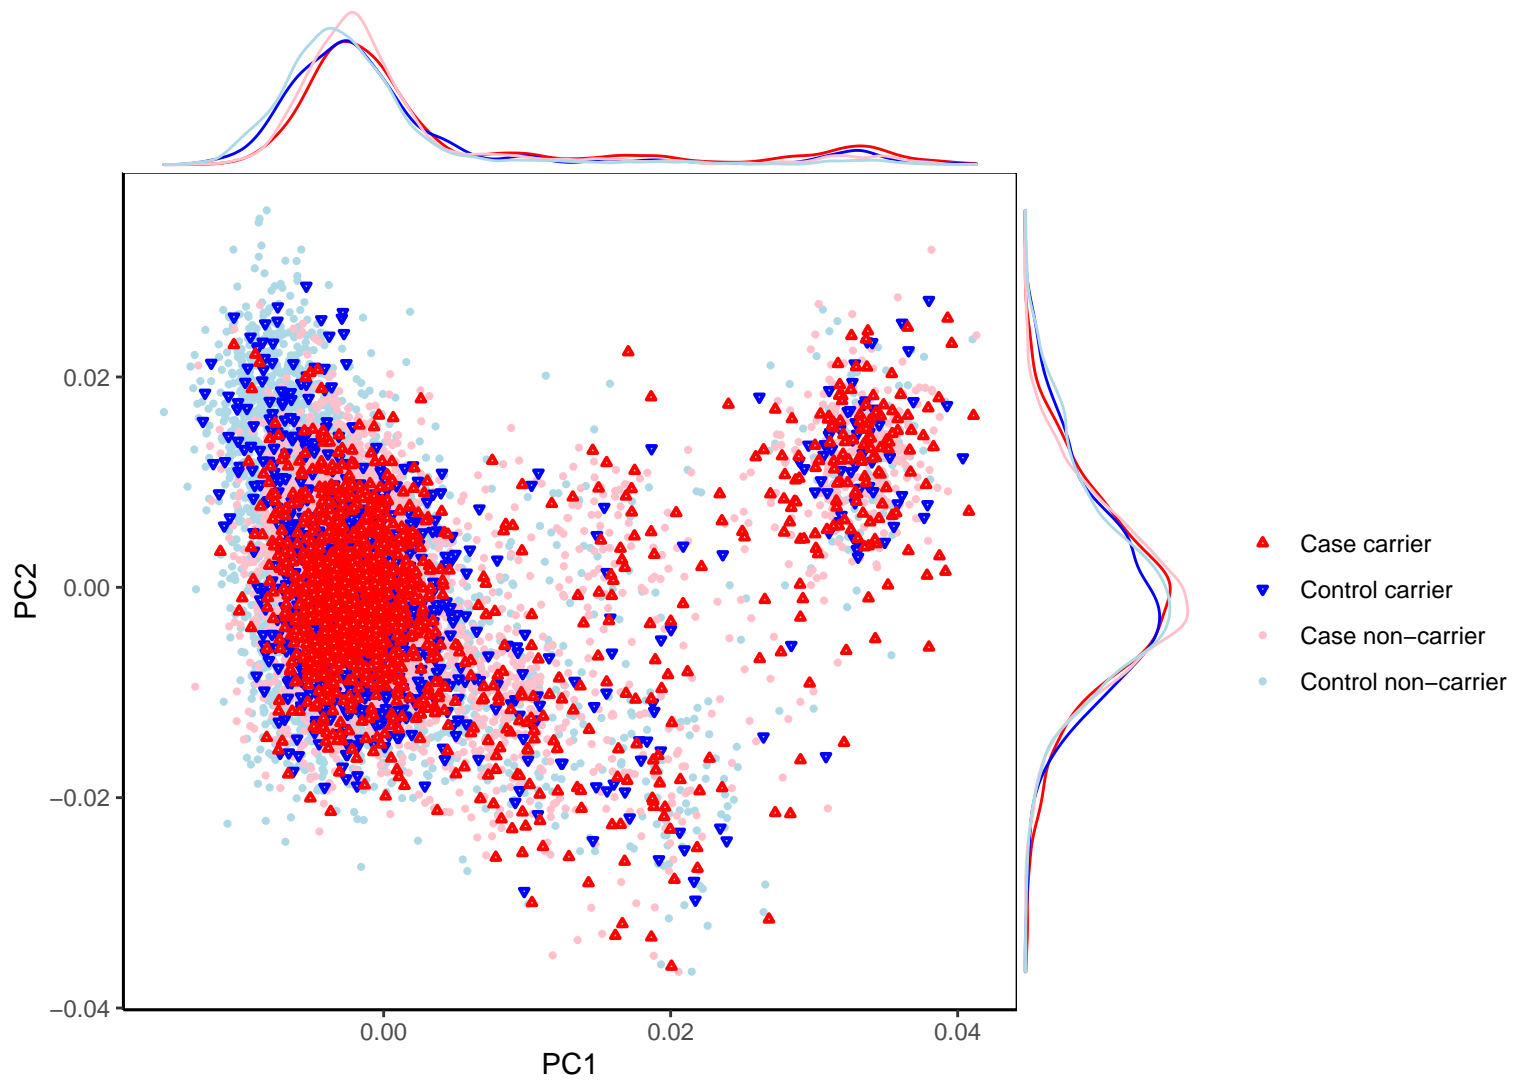



TWIST chr5.40681152\_C\_T

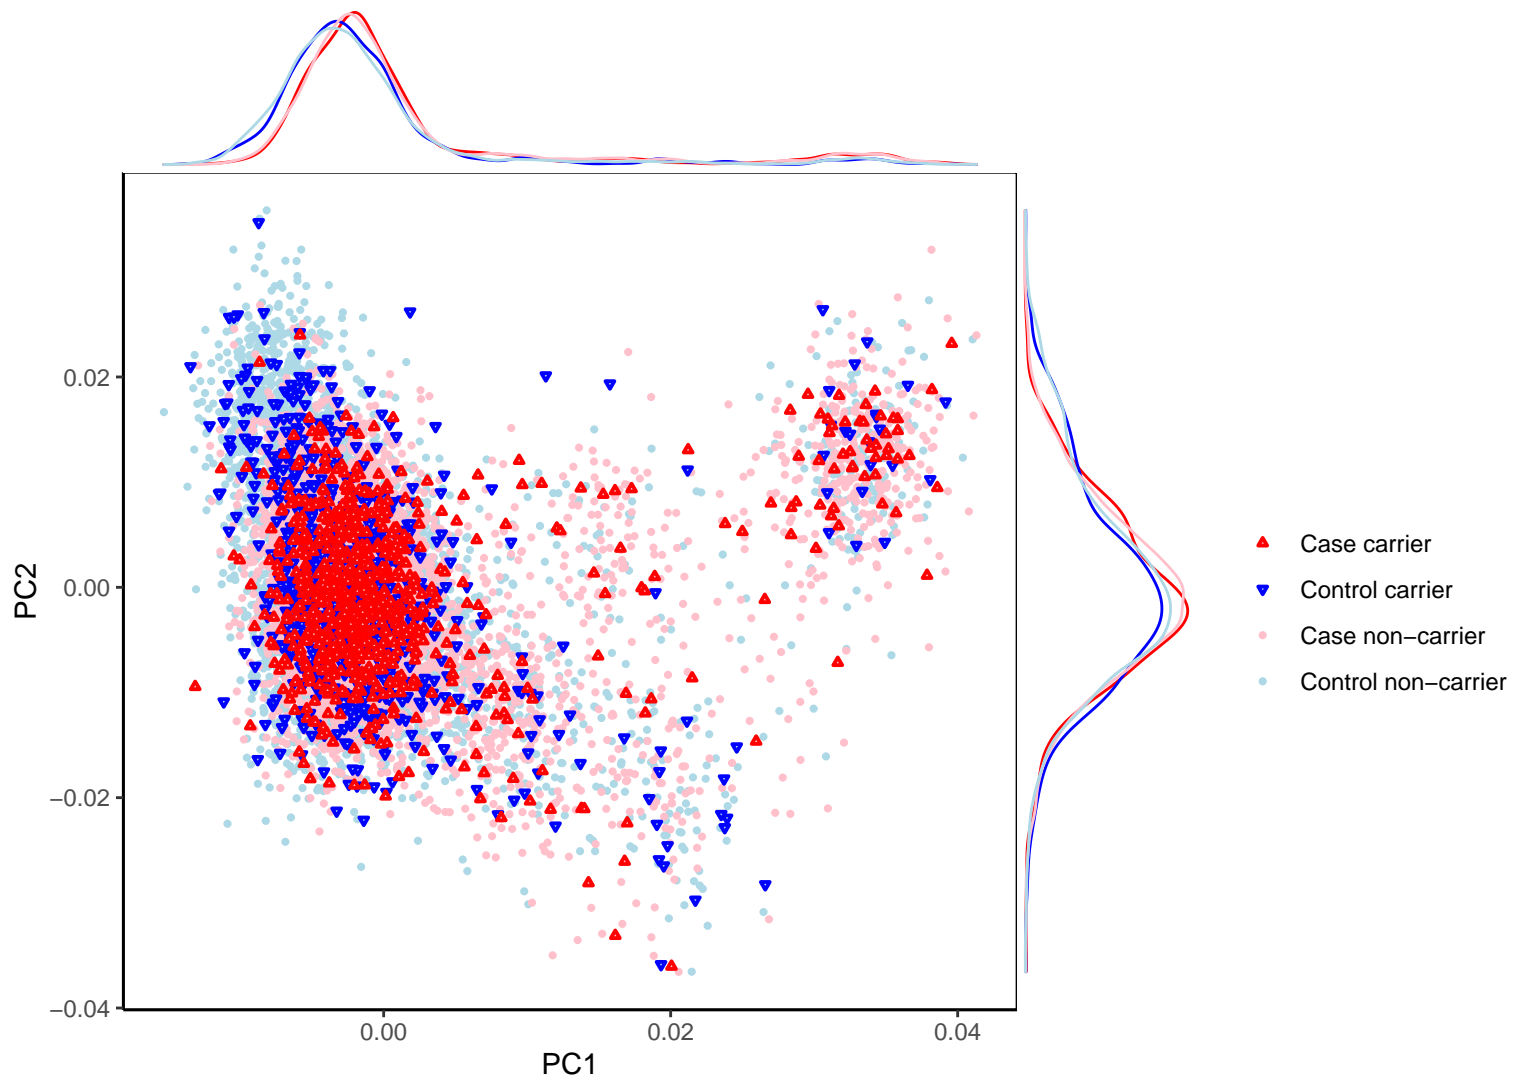

TWIST chr6.159041392\_C\_T

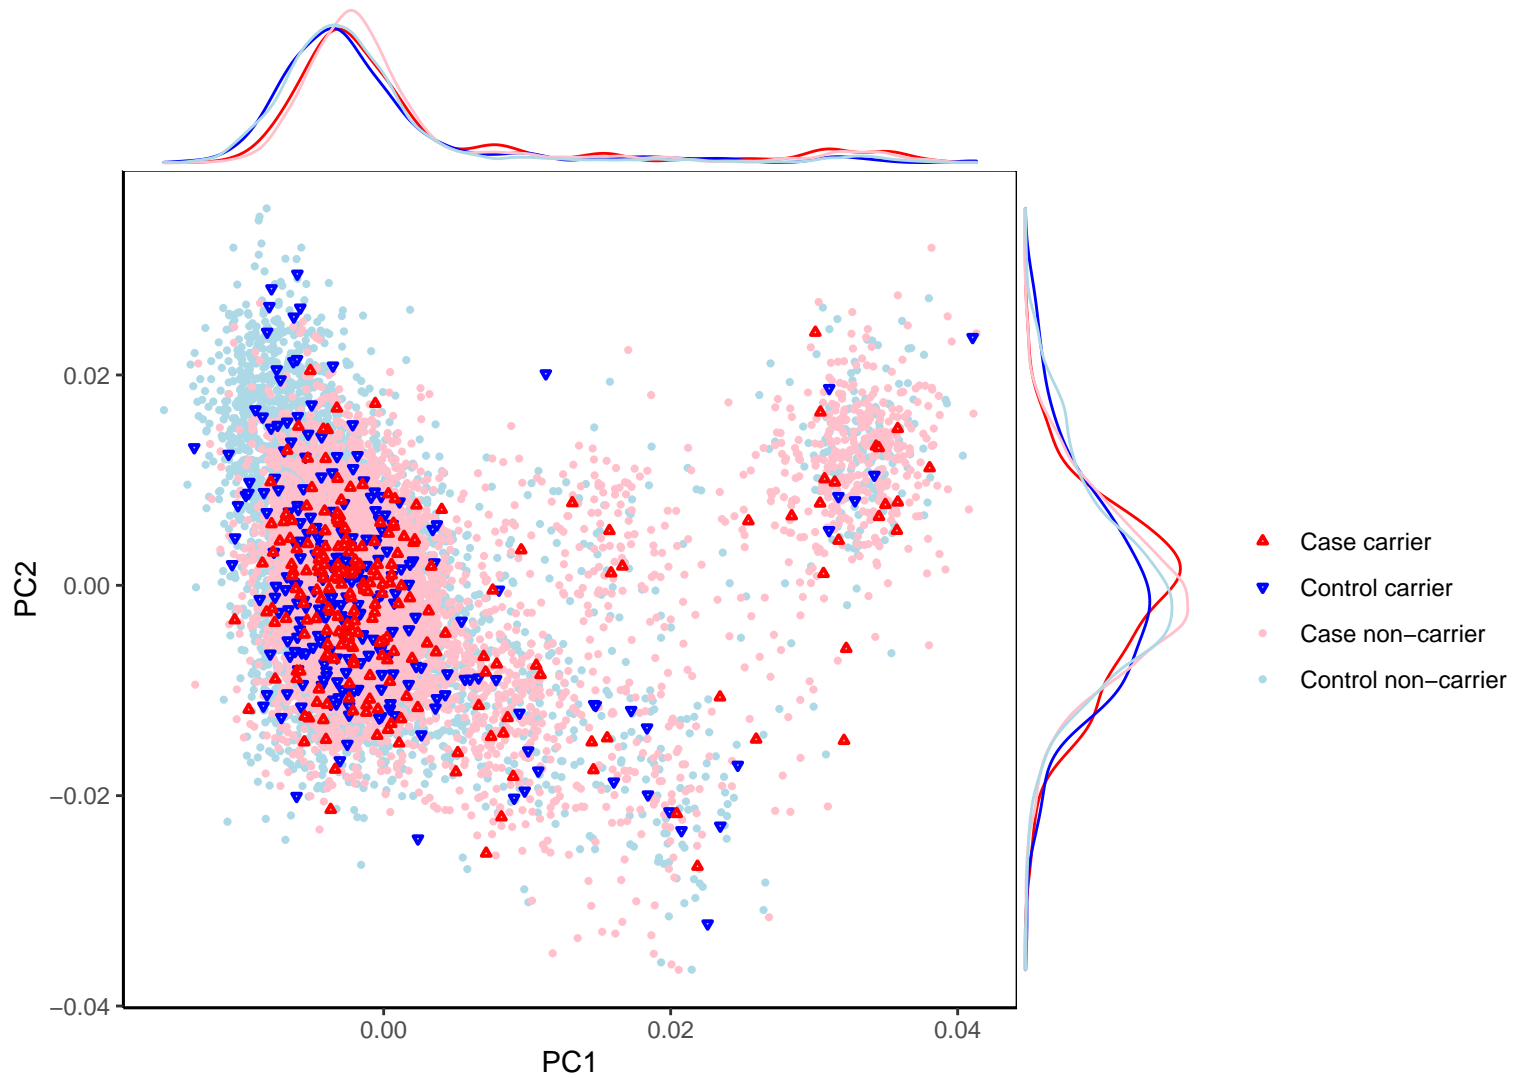

TWIST chr8.21909729\_G\_A

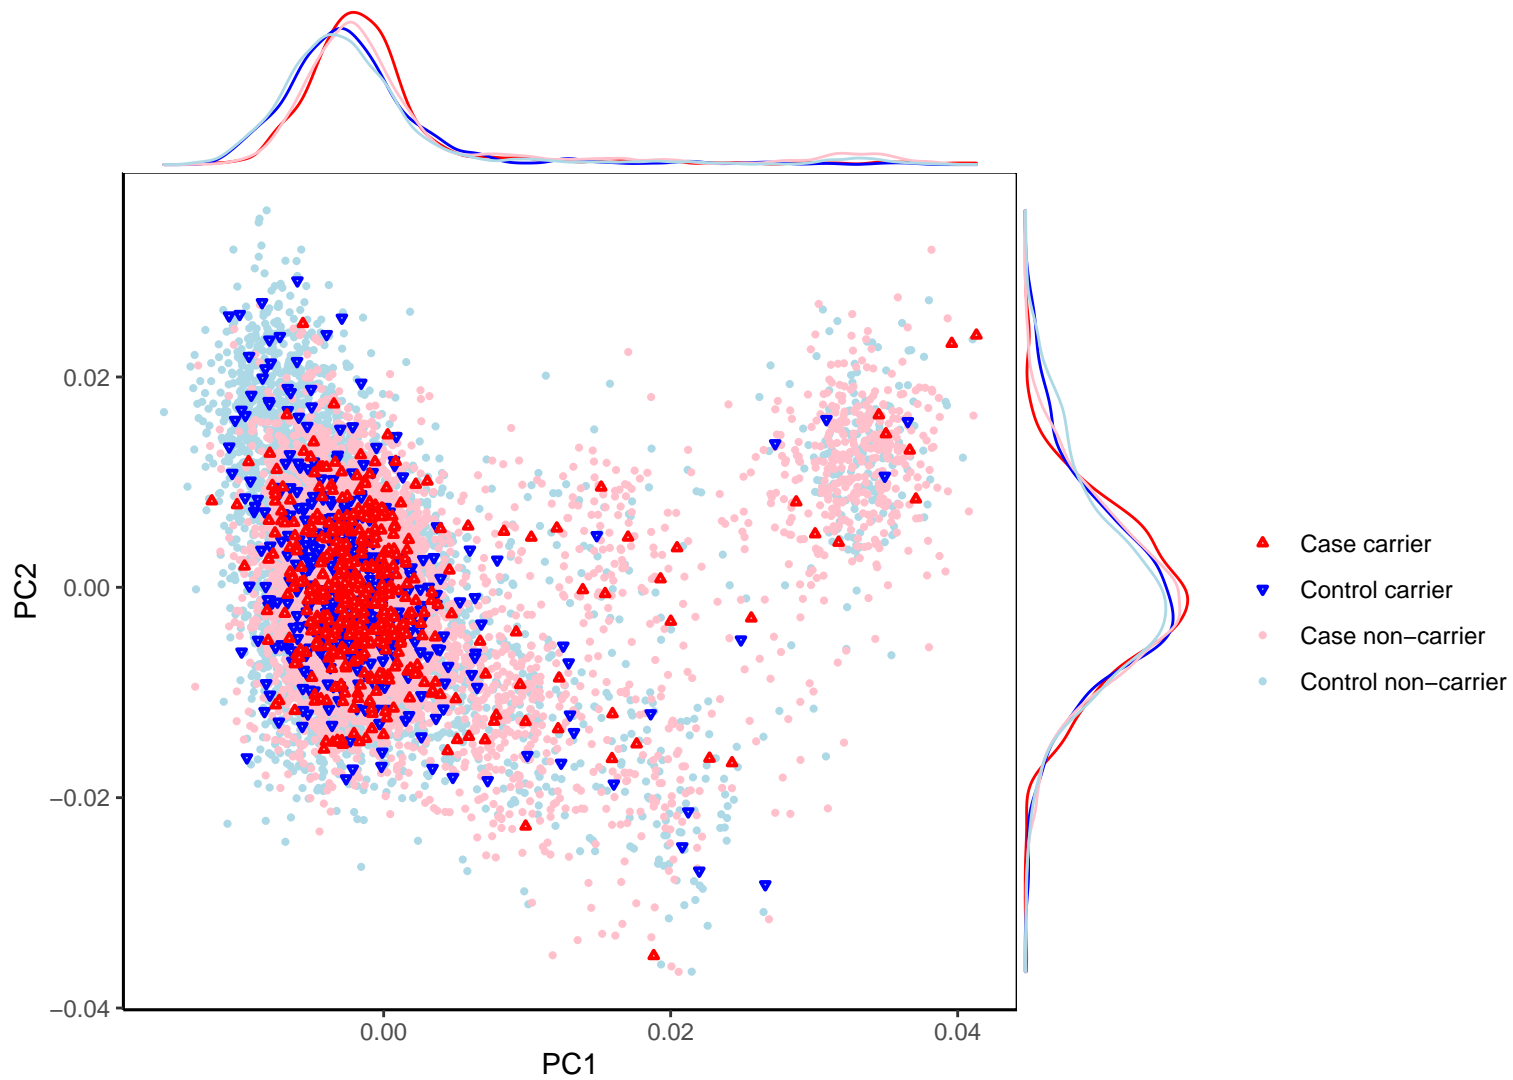

TWIST chr9.136365140\_C\_G

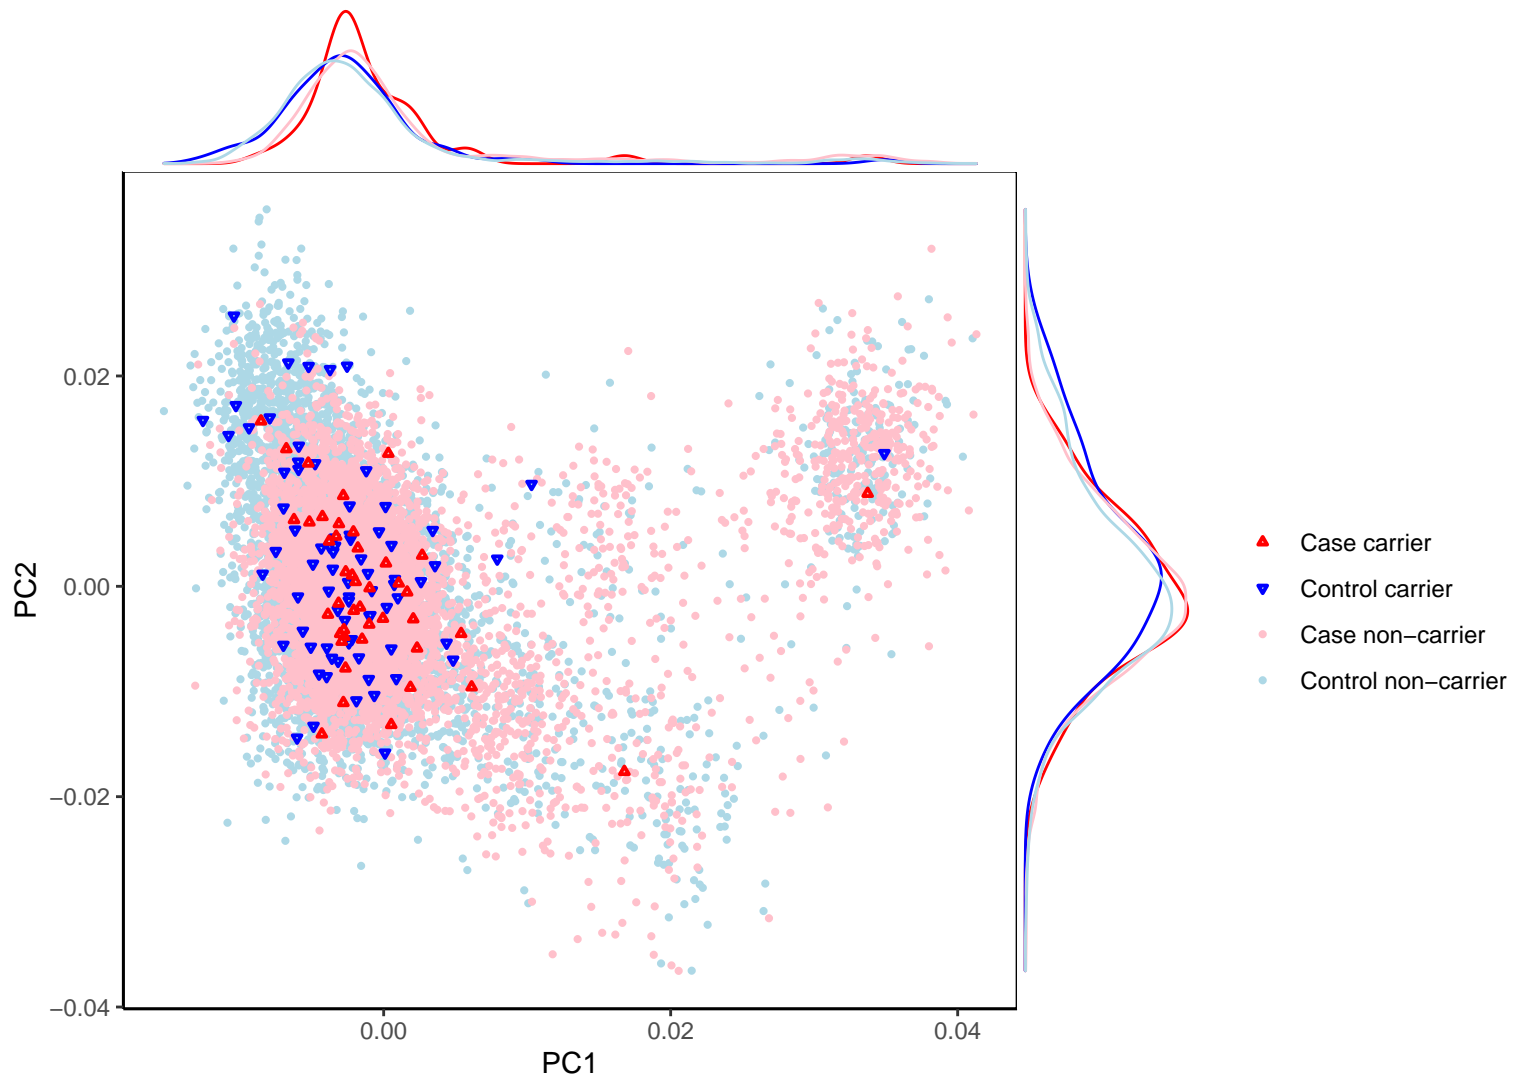

TWIST chr9.136381955\_C\_T

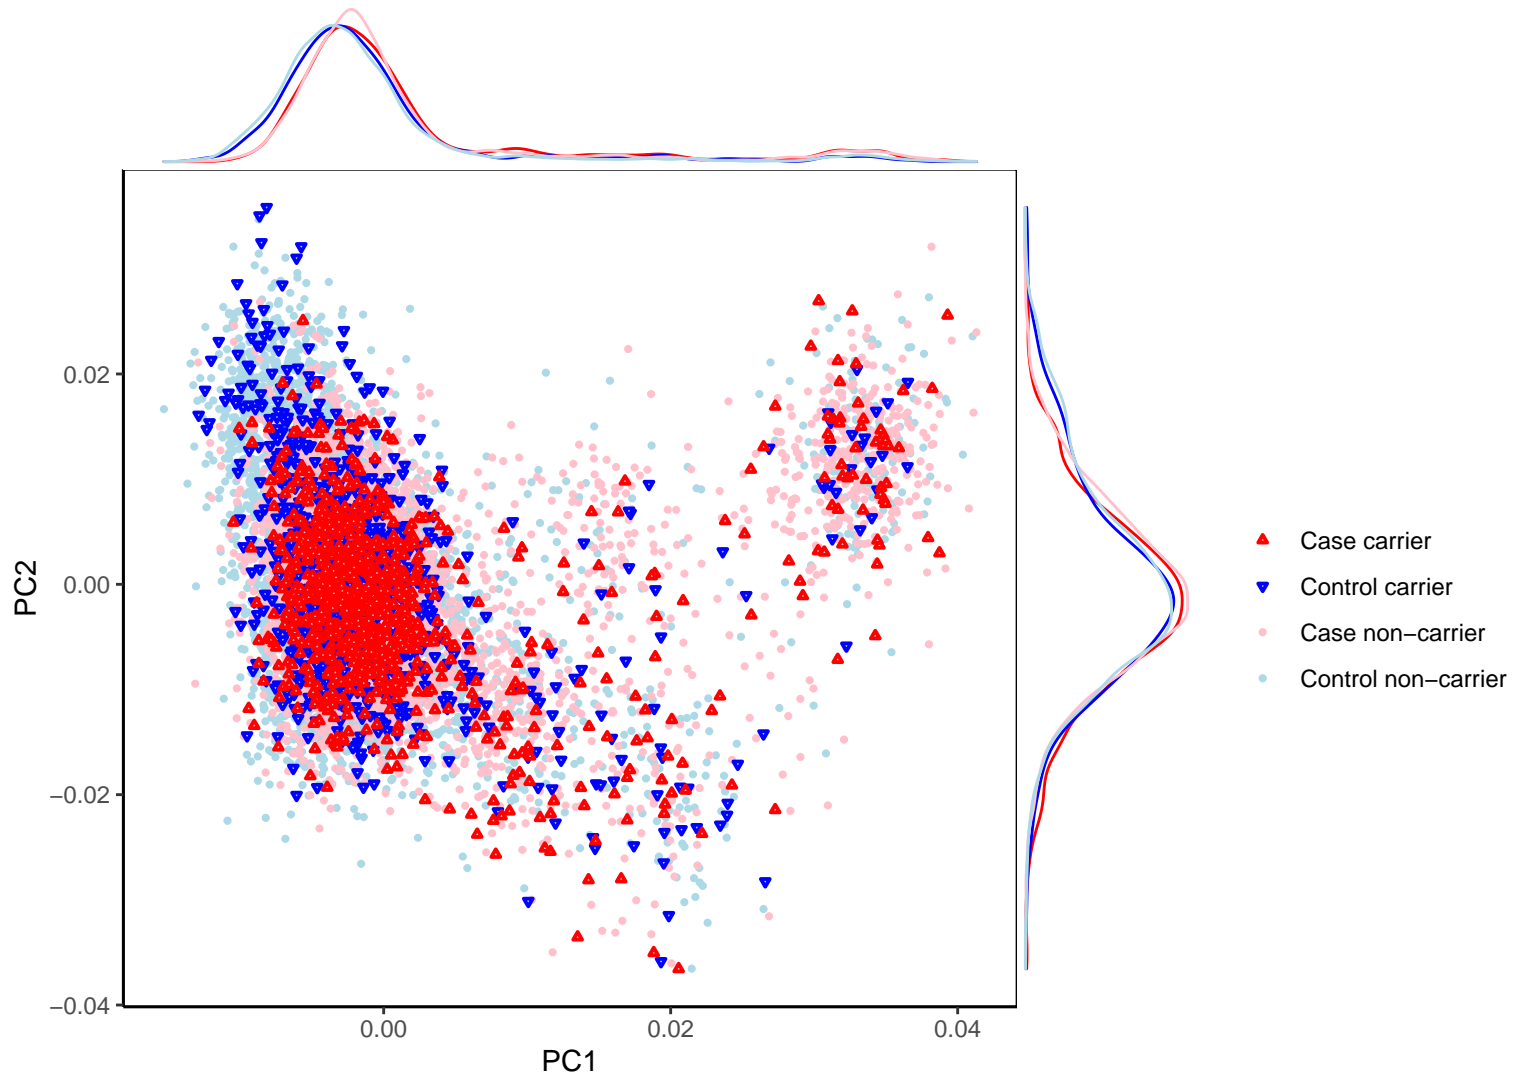

TWIST chr9.136464447\_C\_T

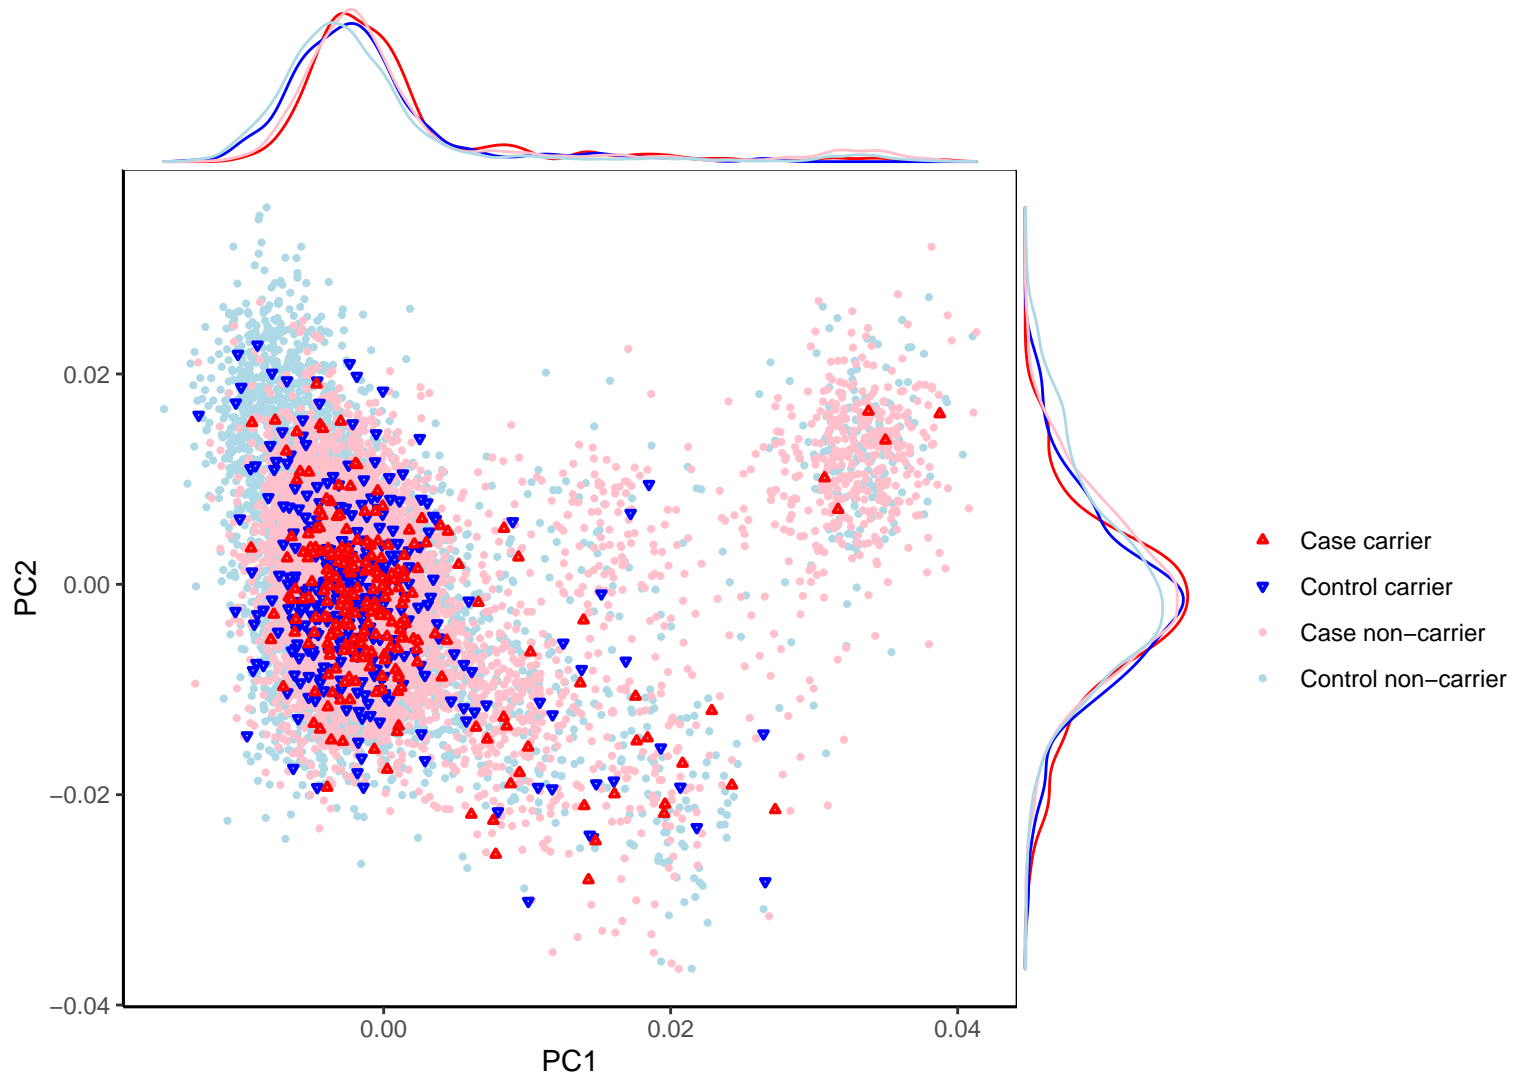

Supplement: NIHMS1828858-supplement-1828858_Sup_Data_1.pdf [file NIHMS1828858-supplement-1828858_Sup_Data_1.pdf]
